# Supplementary material for: Design, Synthesis, and Biological Evaluation of New Potential Unusual Modified Anticancer Immunomodulators for Possible Non-Teratogenic Quinazoline-Based Thalidomide Analogs
Source: MDPI journal article supplement (doi:10.3390/ijms241512416), 2023-08-04

## **Biological testing**

### **1. *In vitro* anti-proliferative activity**

MTT assay protocol was applied as described previously to assess the anti-proliferative activity of the synthesized compounds. Three human cancer cell lines (HepG2, PC3 and MCF-7) were used in this test. Briefly, cells were cultured in RPMI-1640 medium supplemented with 10% fetal bovine serum and 100 units/ml penicillin and 100 µg/ml streptomycin, at 37°C in a 5% CO<sub>2</sub> incubator. Cells were seeded in a 96-well plate at a density of  $5 \times 10^3$  cells / well and left overnight to attach. Cells were treated with different concentrations of the synthesized compounds and incubated for 72 h. 50 µl of MTT solution at 5mg/ml was then added and incubated for 4 h. 100 µl Dimethyl sulfoxide (DMSO) was added into each well to dissolve the purple formazan crystals. The developed color was measured at 570 nm using a plate reader (EXL 800, USA). The relative cell viability in percentage was calculated as (A<sub>570</sub> of treated samples/A<sub>570</sub> of untreated sample) X 100. The half maximal inhibitory concentration (IC<sub>50</sub>) values were calculated using non-linear regression analysis of the data obtained from three independent experiments. Data were presented as mean ±SD.

#### **2.1. Supernatant preparation**

Cell culture supernatants were prepared from HepG2 cell line. Cells were cultured in RPMI 1640 medium supplemented with 10% fetal bovine serum (FBS) , 100 U/ml of penicillin and 100 µg/ml of streptomycin at 37 °C in a humidified 5% CO<sub>2</sub> incubator. The candidate compounds and thalidomide were dissolved in DMSO as a stock solution at 100 mmol/L and diluted with an FBS-free medium to achieve the designated concentrations (IC<sub>50</sub>). The same concentration of DMSO without any compounds was used as a control.  $0.5 \times 10^6$  cells HepG2 cells were cultured into T25 flask, allowed to adhere overnight followed by treatment with the tested compounds. After 72 h, the media was collected and centrifuged for 15 min at 5000 rpm and equal volume of cell culture supernatants were collected and utilized for immunoassay using different kits [1].

#### **2.2. Cell lysate preparation**

The tested compounds and thalidomide were incubated for 72 h with HepG2 cells. Then, the cells were collected by trypsinization using 0.25 % trypsin/EDTA solution. Cell palettes then were washed three times with phosphate buffer saline (PBS) and lysed by three repetitive freezing/thawing cycles (thawing at 37 °C for 2 min and freezing at –80 °C for 15 min), followed by homogenization of the cells by passing through a 20G needle [2].

### **2.3 Estimation of NF- $\kappa$ B P65 and Caspase-8 levels in HepG2 cell lysate.**

50  $\mu$ L/well of cell lysate or standard were applied to the microtiter plates pre-coated with the specific monoclonal antibodies of caspase-8, and NF- $\kappa$ B P65 and incubated at 37 °C for 90 min. All wells were washed three times using the wash buffer to remove any unbound proteins. Biotinylated detection antibody was then added, followed by incubation at 37 °C for 60 min. The solution was aspirated and washed three times with the wash buffer. Horseradish peroxidase (HRP) conjugated streptavidin was added to all wells and incubated for 30 min at 37 °C. At the end of the incubation period, the solution was removed and 90  $\mu$ L of substrate reagent was added to each well and incubated at 37 °C for 15 min. To stop the reaction, 50  $\mu$ L of stop solution was added and then the absorbance was measured immediately at 450 nm using the ELISA plate reader (FLUO star OPTIMA). Concentrations of caspase-8 and NF- $\kappa$ B P65 were determined by interpolating the absorbance values with that of the standard curve obtained from the known concentrations of standard proteins. [2].

### **2.3 Estimation of VEGF and TNF- $\alpha$ in HepG2 levels cell culture supernatant.**

In order to quantify the VEGF and TNF- $\alpha$  protein that was secreted extracellularly by HepG2 cells, following drug treatment, the media content was analyzed by ELISA using VEGF and TNF- $\alpha$  ELISA kits (E-EL-H1600, Elabscience and ab181421, abcam) respectively, as per manufacturer's instructions.

### **3. Cell cycle analysis**

To determine the effect of the synthesized compounds on cell cycle distribution, cell cycle analysis was performed using propidium iodide (PI) staining and flow cytometry analysis for compound **XIVc** Flow Cytometry Kit for Cell Cycle Analysis (ab139418\_Propidium Iodide Flow Cytometry Kit/BD) was used in this test. HepG2 cells were treated with the IC<sub>50</sub> of compound **XIVc** for 72 h. Then, the cell pellets were fixed in 70% ethanol at 4 °C for 12 h. After that, cells were washed with cold PBS, incubated with 100  $\mu$ L RNase A at 37 °C for 30 min, and stained with 400  $\mu$ L PI in the dark at room temperature for further 30 min. The

stained cells were measured using Epics XL-MCL™ Flow Cytometer (Beckman Coulter), and the data were analyzed using Flowing software (version 2.5.1, Turku Centre for Biotechnology, Turku, Finland).

#### 4. Apoptosis assay

Flow cytometry was used to investigate the effect of synthesized compounds on cellular apoptosis. HepG2 cells were treated with compound **XIVc** at IC<sub>50</sub> for 72 h, cells then were collected by trypsinization, centrifuged, washed three successive times with PBS, suspended in 500 µl binding buffer, and double stained with 5 µl Annexin V-FITC and 5 µl PI in the dark at room temperature for 15 min. The stained cells were measured using Epics XL-MCL™ Flow Cytometer and analyzed using the machine provided software.

#### References

1. Dawoud, N.T.A.; El-Fakharany, E.M.; Abdallah, A.E.; El-Gendi, H.; Lotfy, D.R. Synthesis, and docking studies of novel heterocycles incorporating the indazolylthiazole moiety as antimicrobial and anticancer agents. *Sci. Rep.* 2022, 12, 3424.
2. Abdallah, A.E.; Mabrouk, R.R.; Elnagar, M.R.; Farrag, A.M.; Kalaba, M.H.; Sharaf, M.H.; El-Fakharany, E.M.; Bakhotmah, D.A.; Elkaeed, E.B.; Al Ward, M.M.S. New Series of VEGFR-2 Inhibitors and Apoptosis Enhancers: Design, Synthesis and Bi-ological Evaluation. *Drug Des. Devel. Ther.* 2022, 16, 587–606.

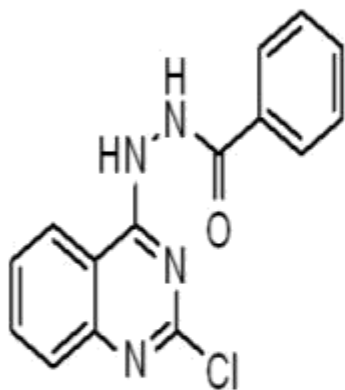

1HNMR for comp. VIIa

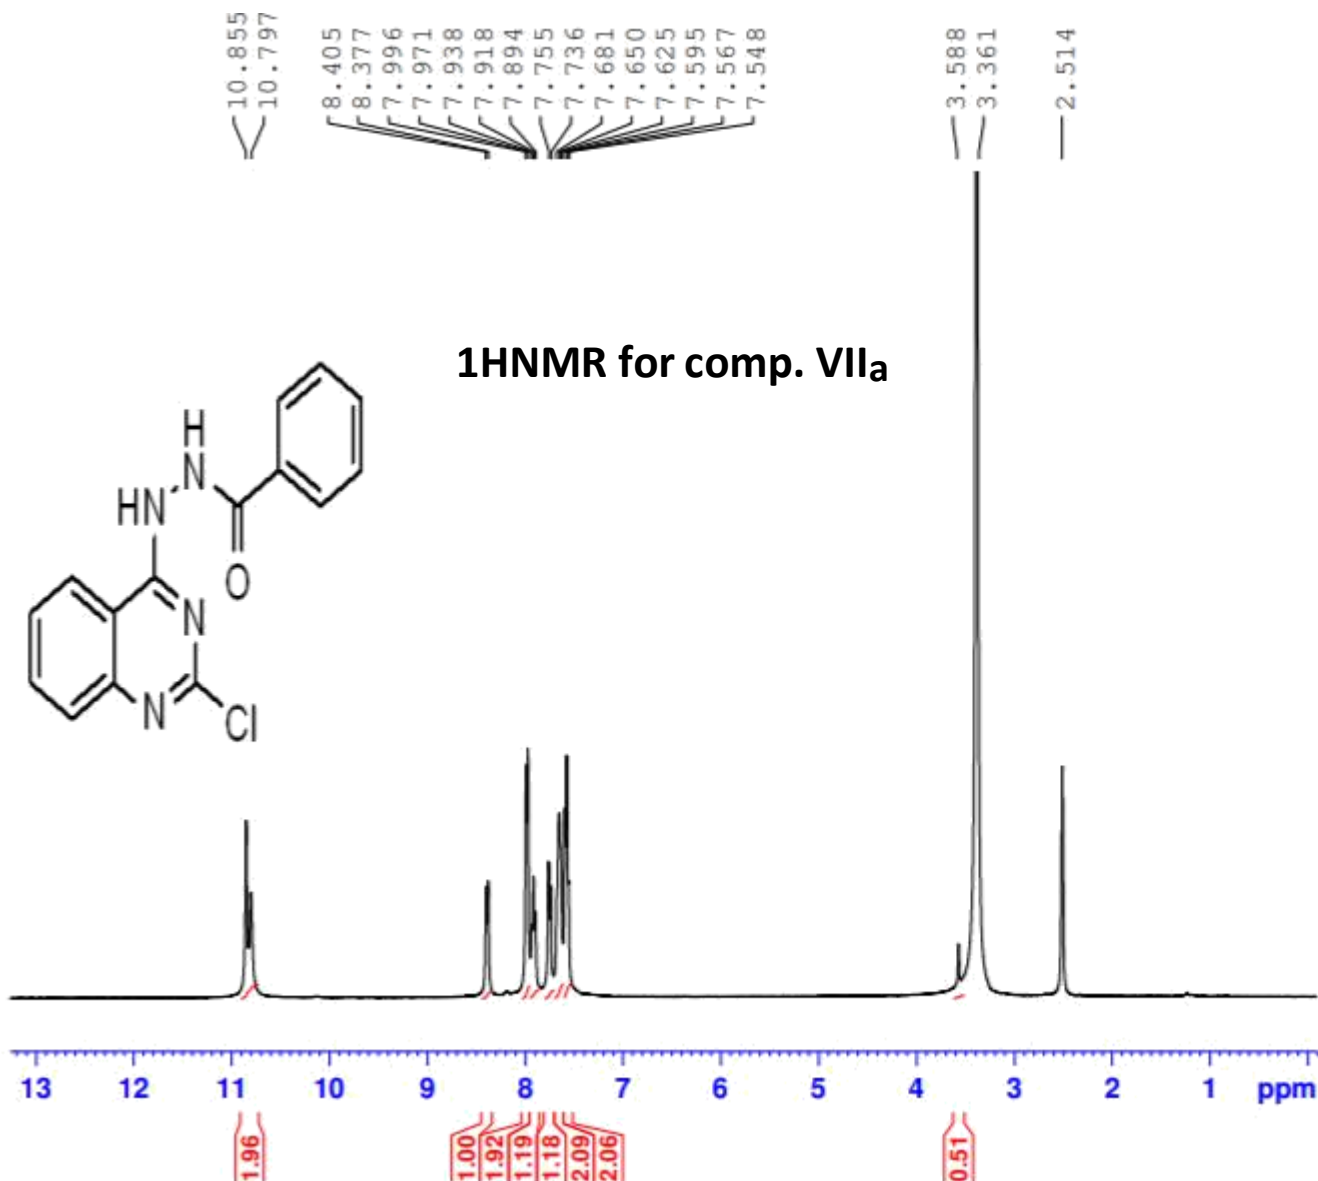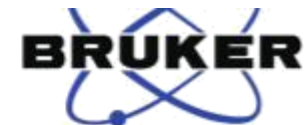

Current Data Parameters  
 NAME RRM-B13  
 EXPNO 1  
 PROCNO 1

F2 - Acquisition Parameters  
 Date\_ 20200116  
 Time 11.03  
 INSTRUM spect  
 PROBHD 5 mm PABBO BB/  
 PULPROG zg30  
 TD 65536  
 SOLVENT DMSO  
 NS 69  
 DS 2  
 SWH 8012.820 Hz  
 FIDRES 0.122266 Hz  
 AQ 4.0894465 sec  
 RG 205.37  
 DW 62.400 usec  
 DE 6.50 usec  
 TE 298.0 K  
 D1 1.00000000 sec  
 TD0 1

----- CHANNEL f1 -----  
 SFO1 400.1524711 MHz  
 NUC1 1H  
 P1 12.00 usec  
 PLW1 18.00000000 W

F2 - Processing parameters  
 SI 65536  
 SF 400.1500000 MHz  
 WDW EM  
 SSB 0  
 LB 0.30 Hz  
 GB 0  
 PC 1.00

  
**BRUKER**

Transmittance [%]

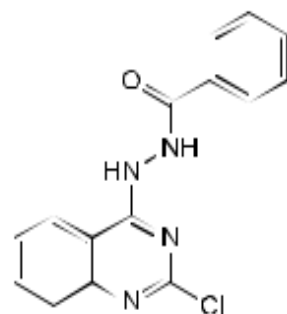

IR for comp. VIIa

3272.28

1669.10

1573.79

1523.11

1486.68

1421.30

1376.84

1281.43

1224.26

1194.89

1090.01

956.97

860.44

799.02

758.00

704.25

685.22

601.37

3500

3000

2500

2000

1500

1000

500

Wavenumber cm<sup>-1</sup>

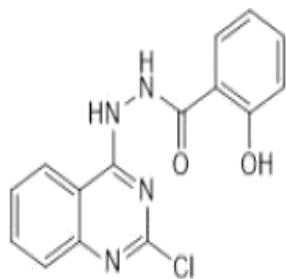

**<sup>1</sup>HNMR for comp.VIIb**

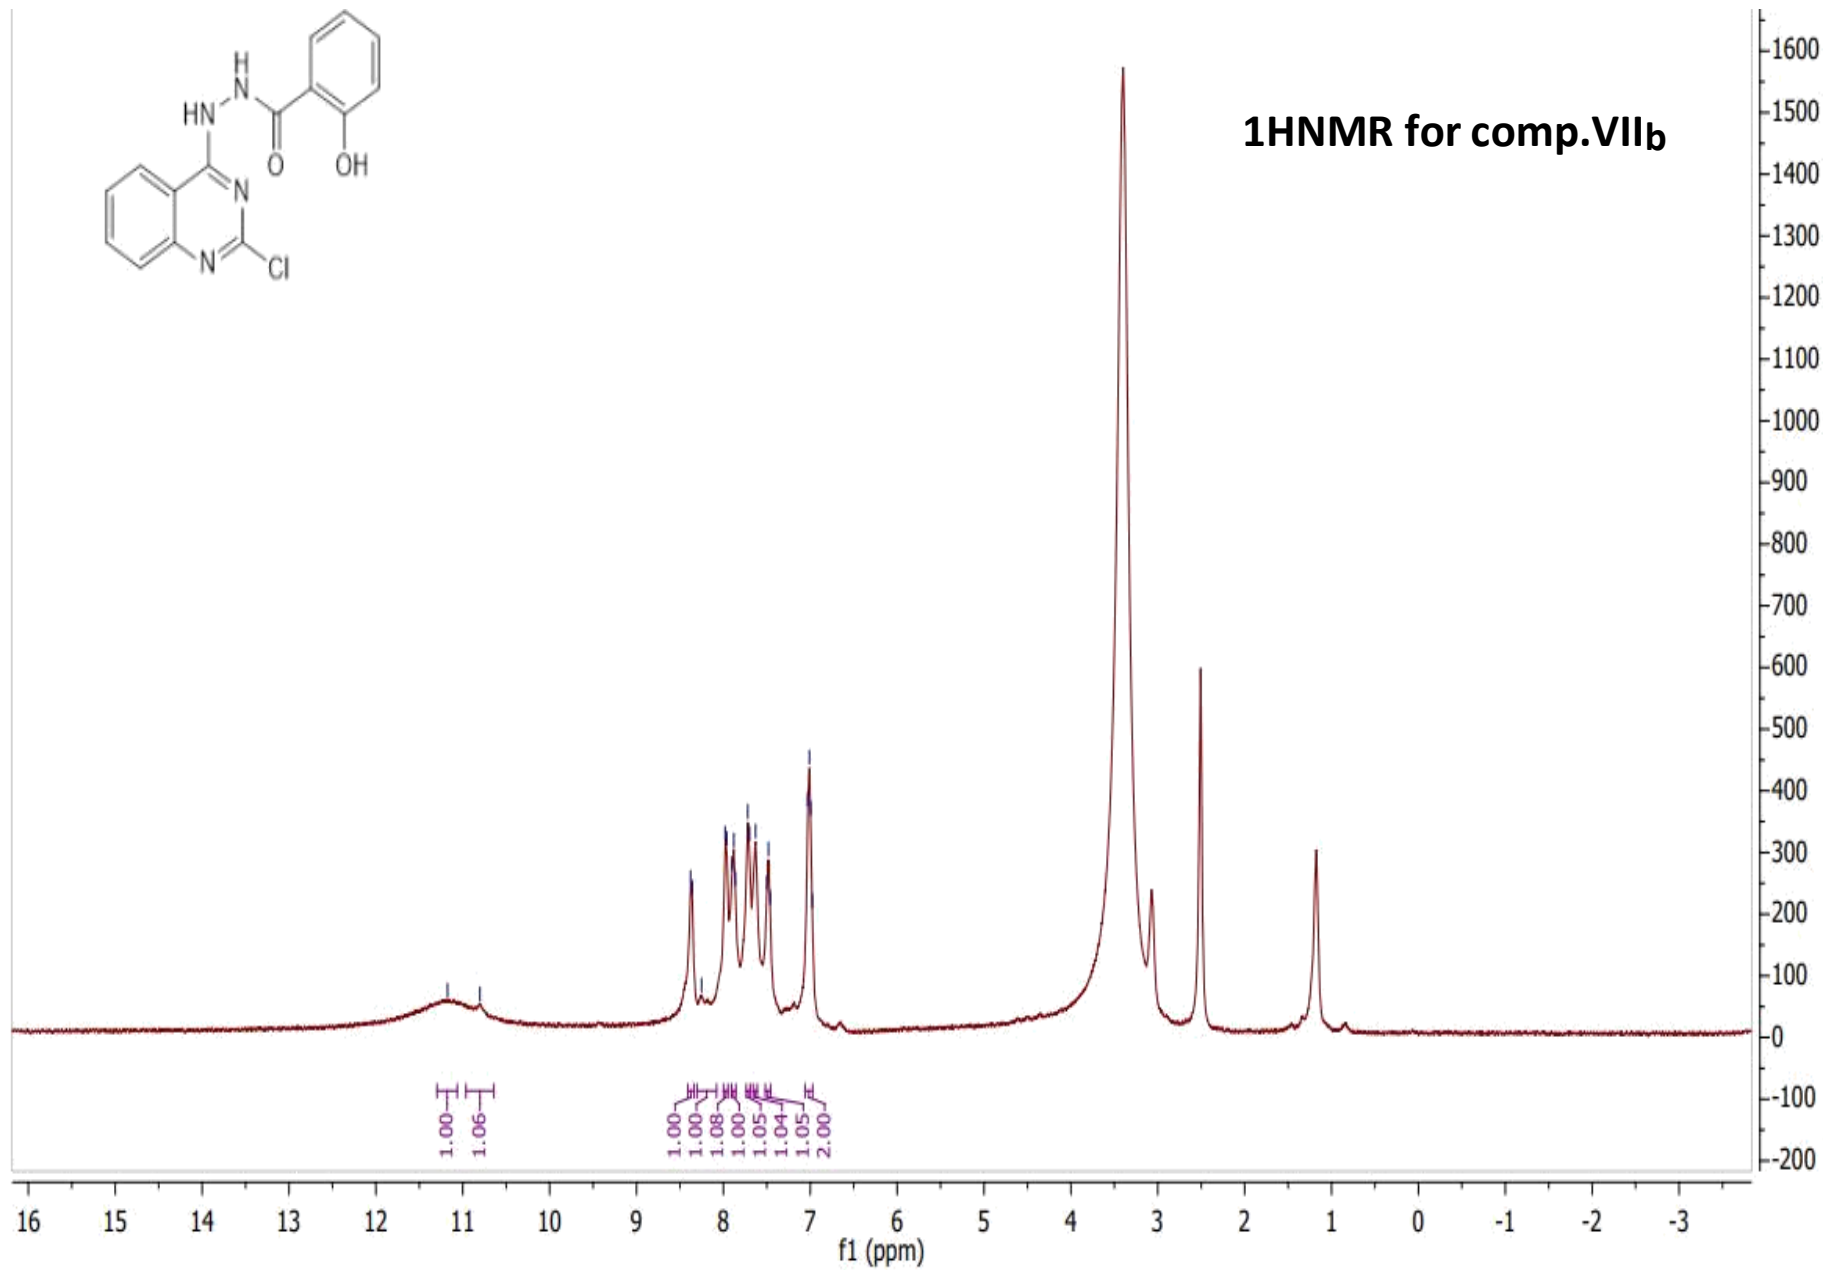

RRM-B7.1.fid

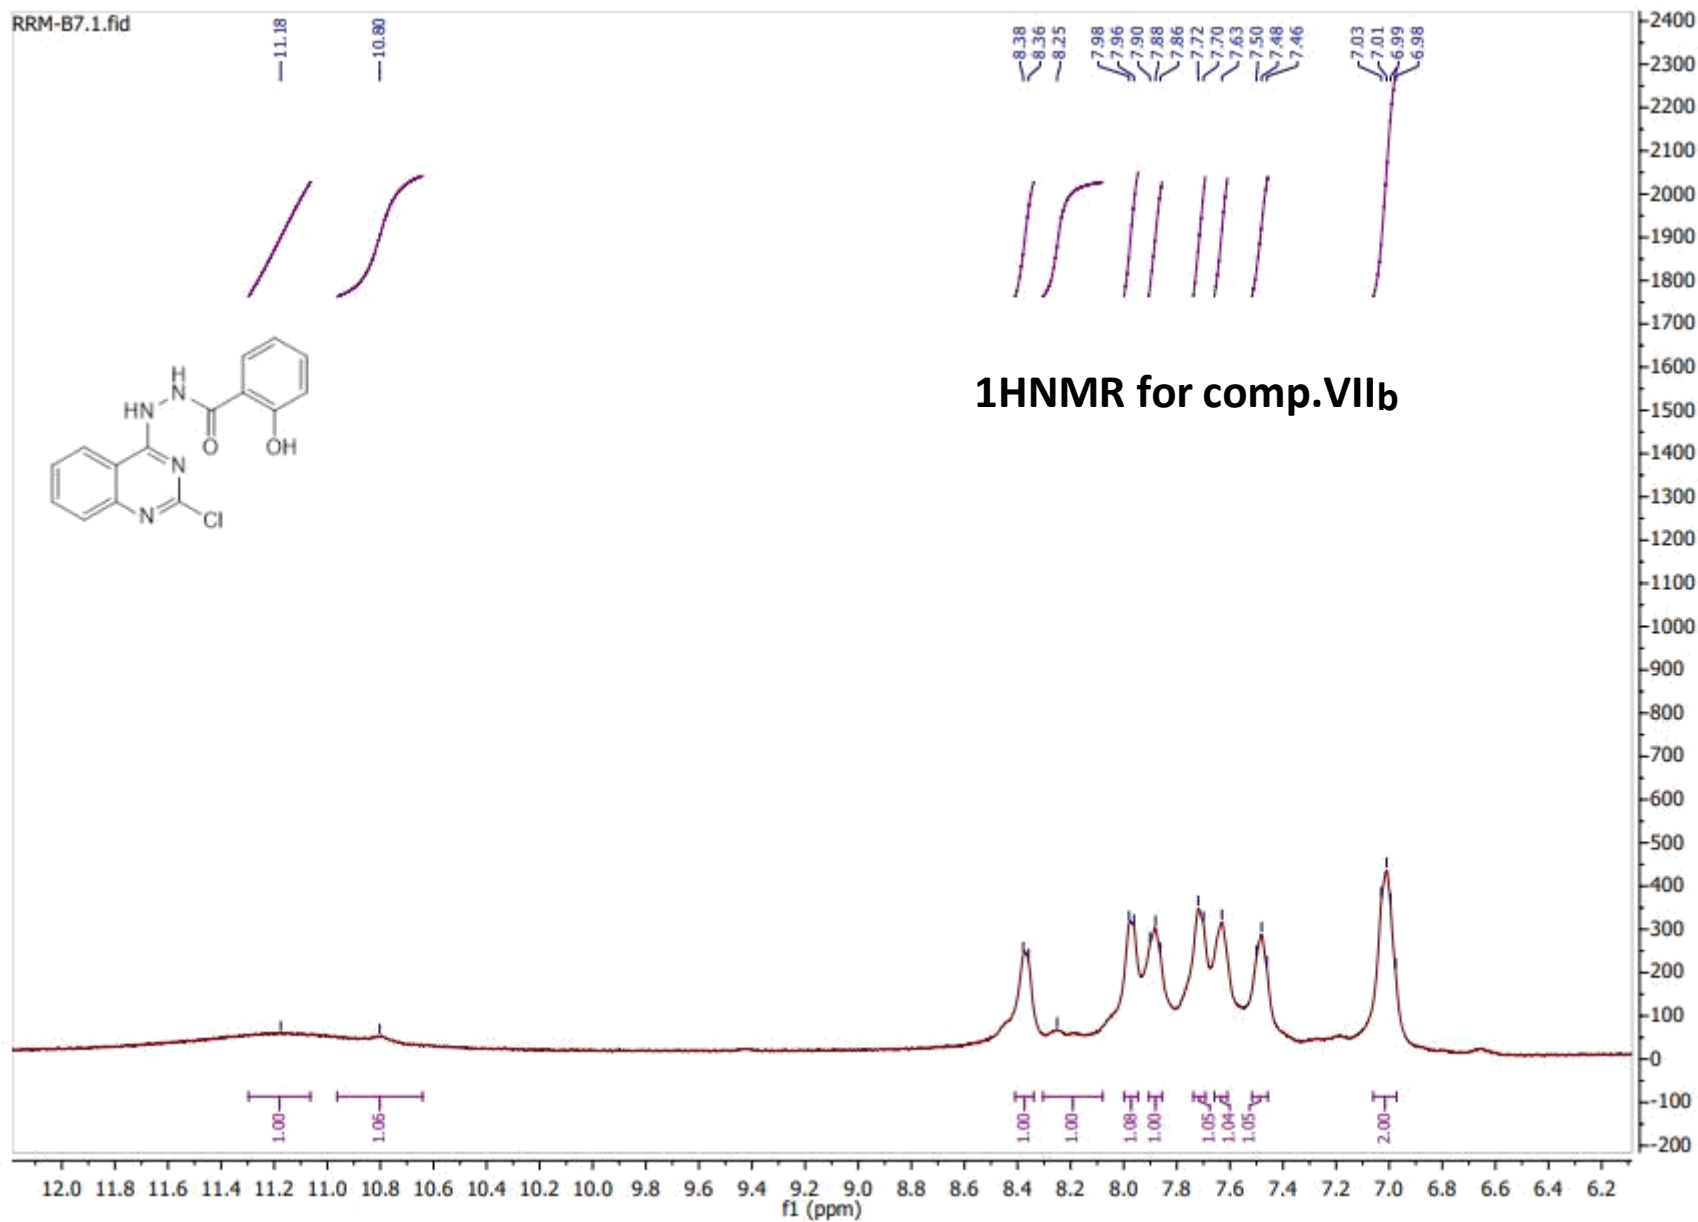

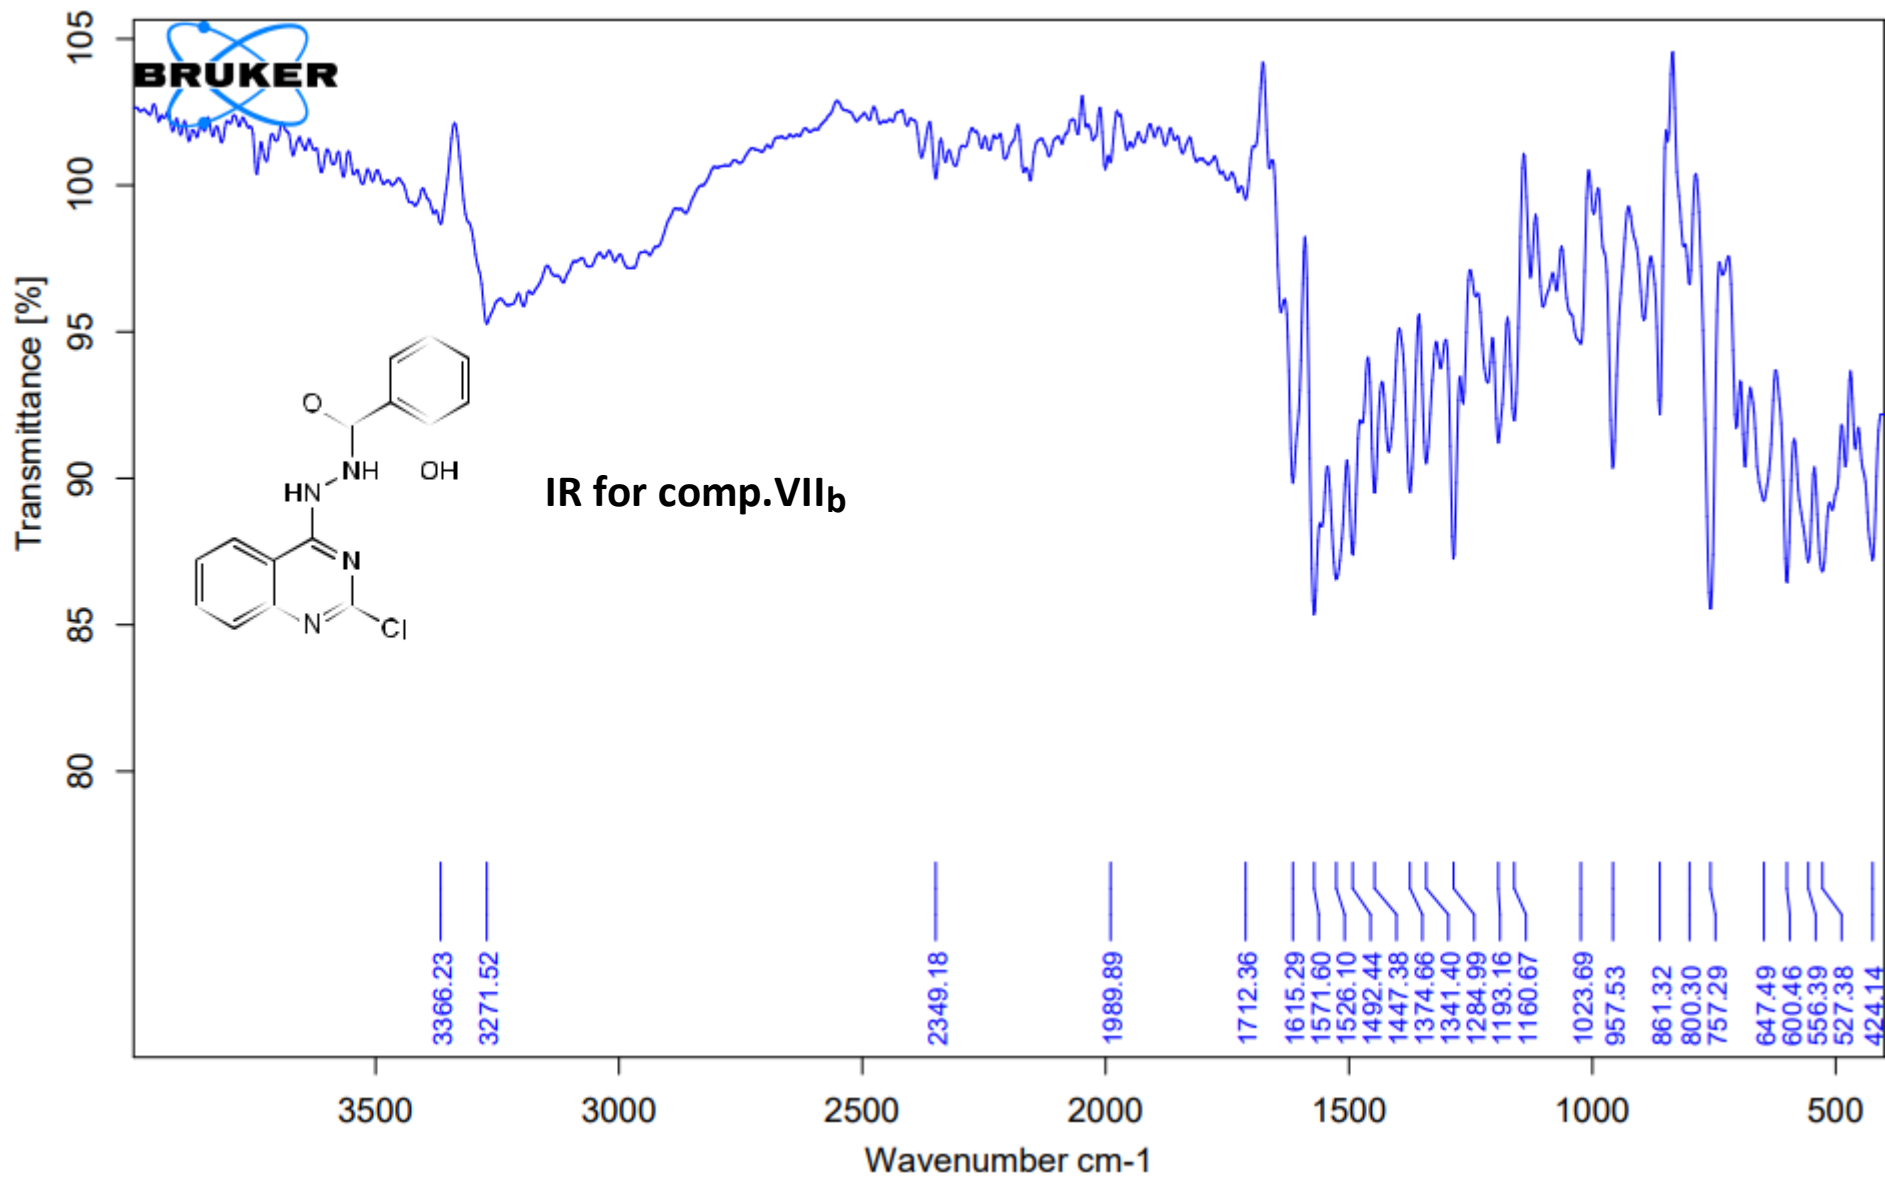



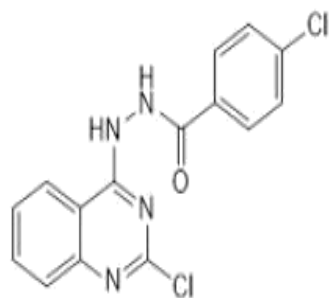

**<sup>1</sup>HNMR for comp.VII<sub>c</sub>**

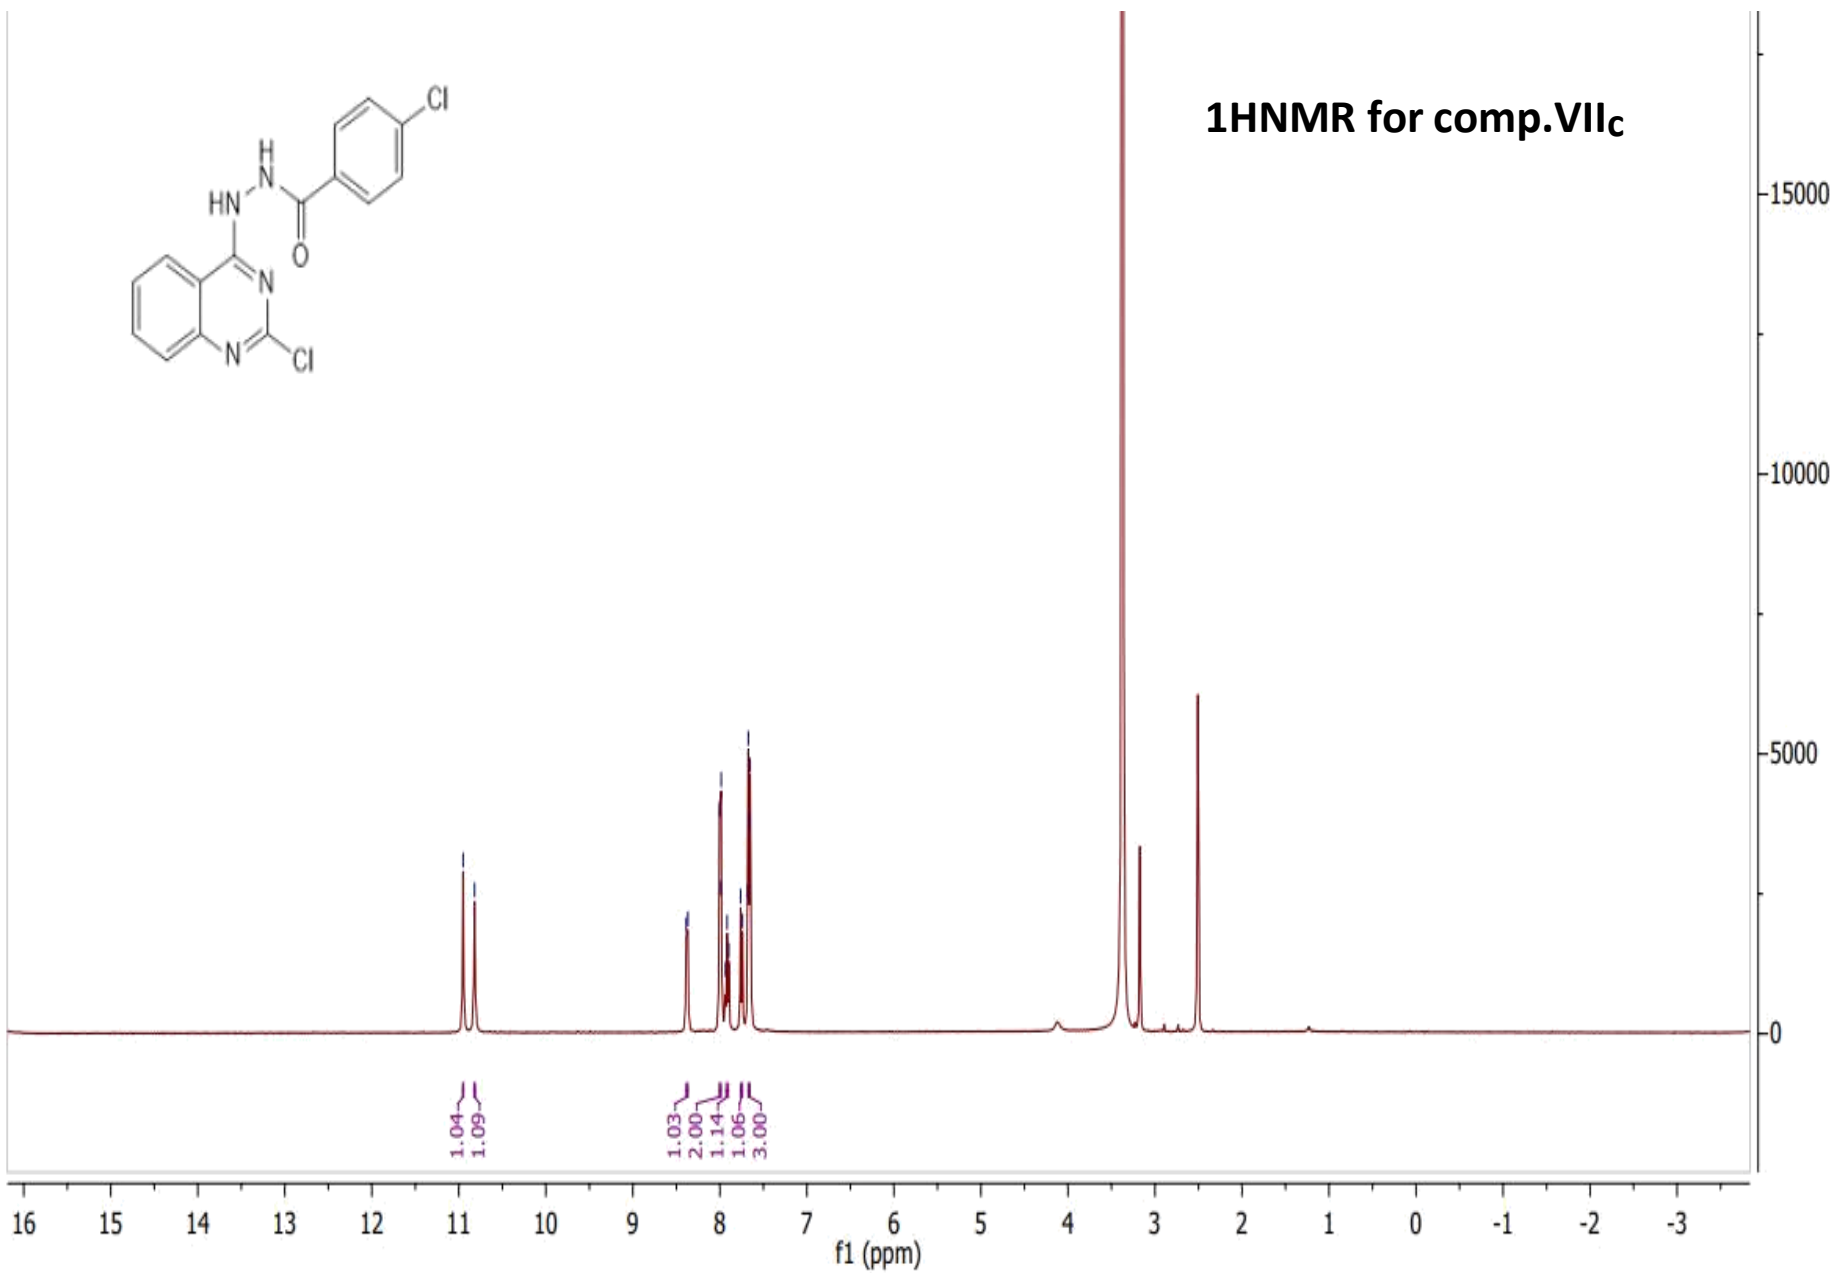

RRM-B8.2.fid

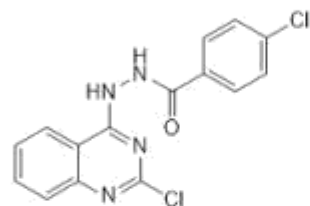

### **<sup>13</sup>C NMR for comp.VIIc**

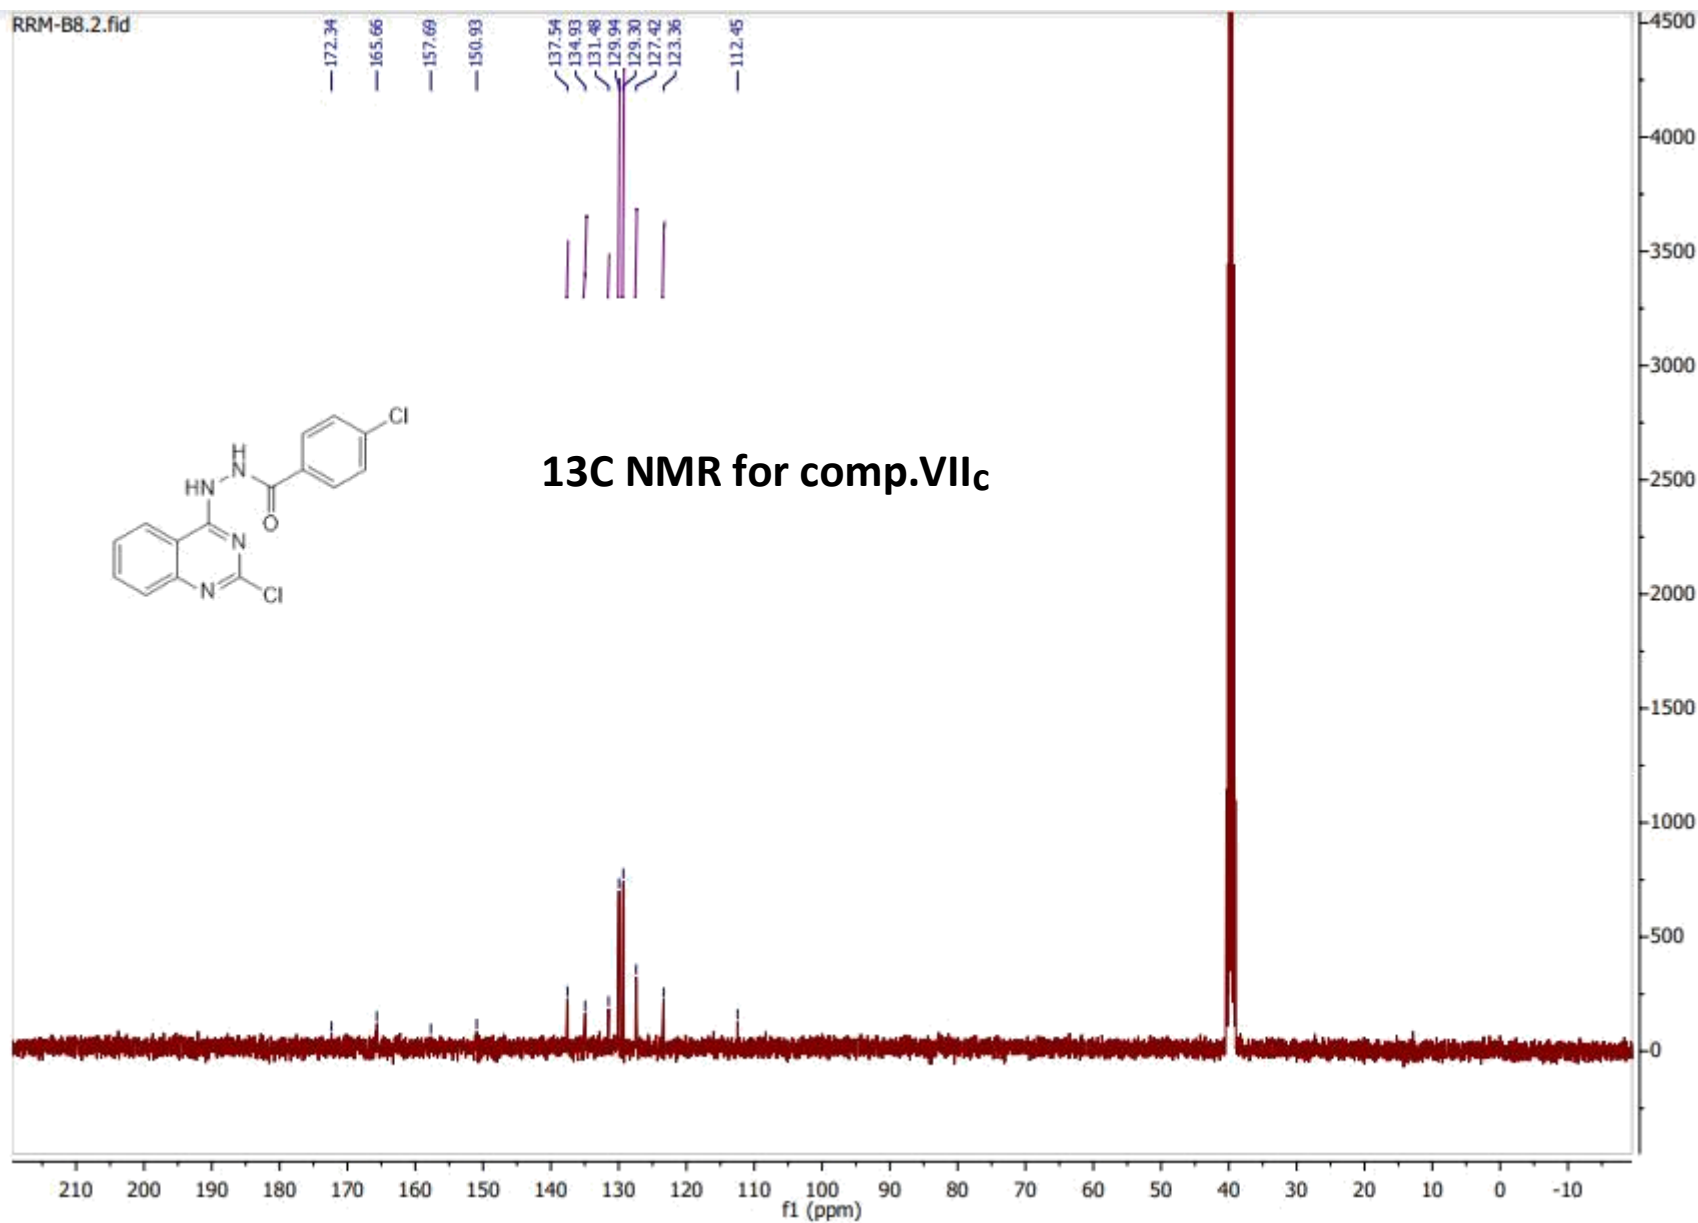

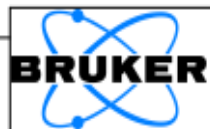

IR for comp.VIIc

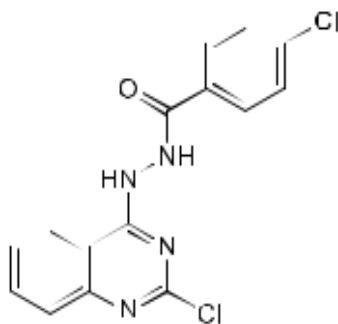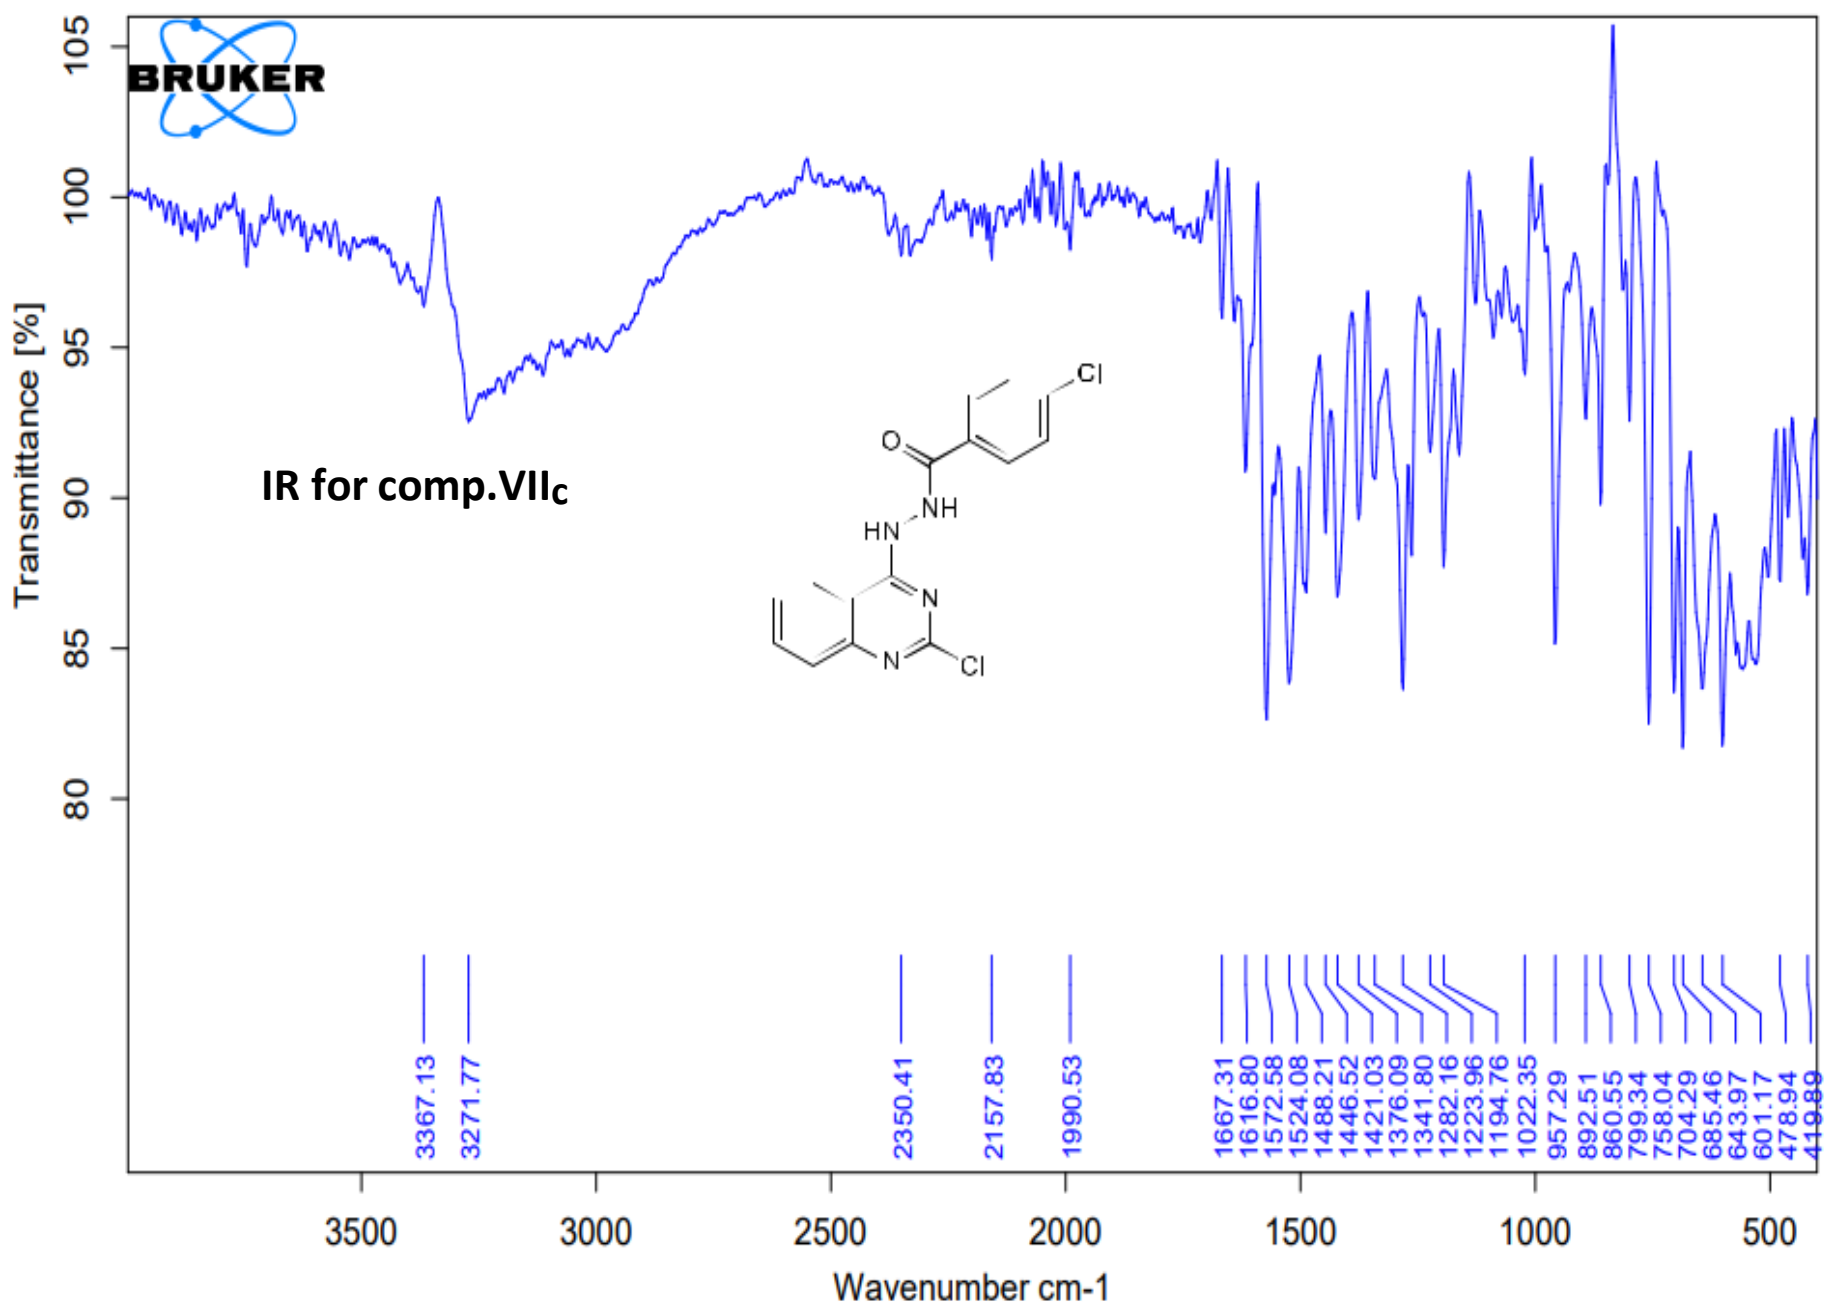

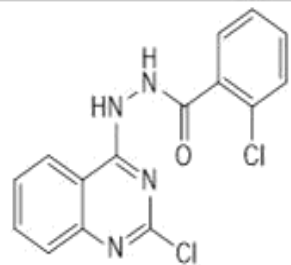

**<sup>1</sup>H NMR for comp.VII d**

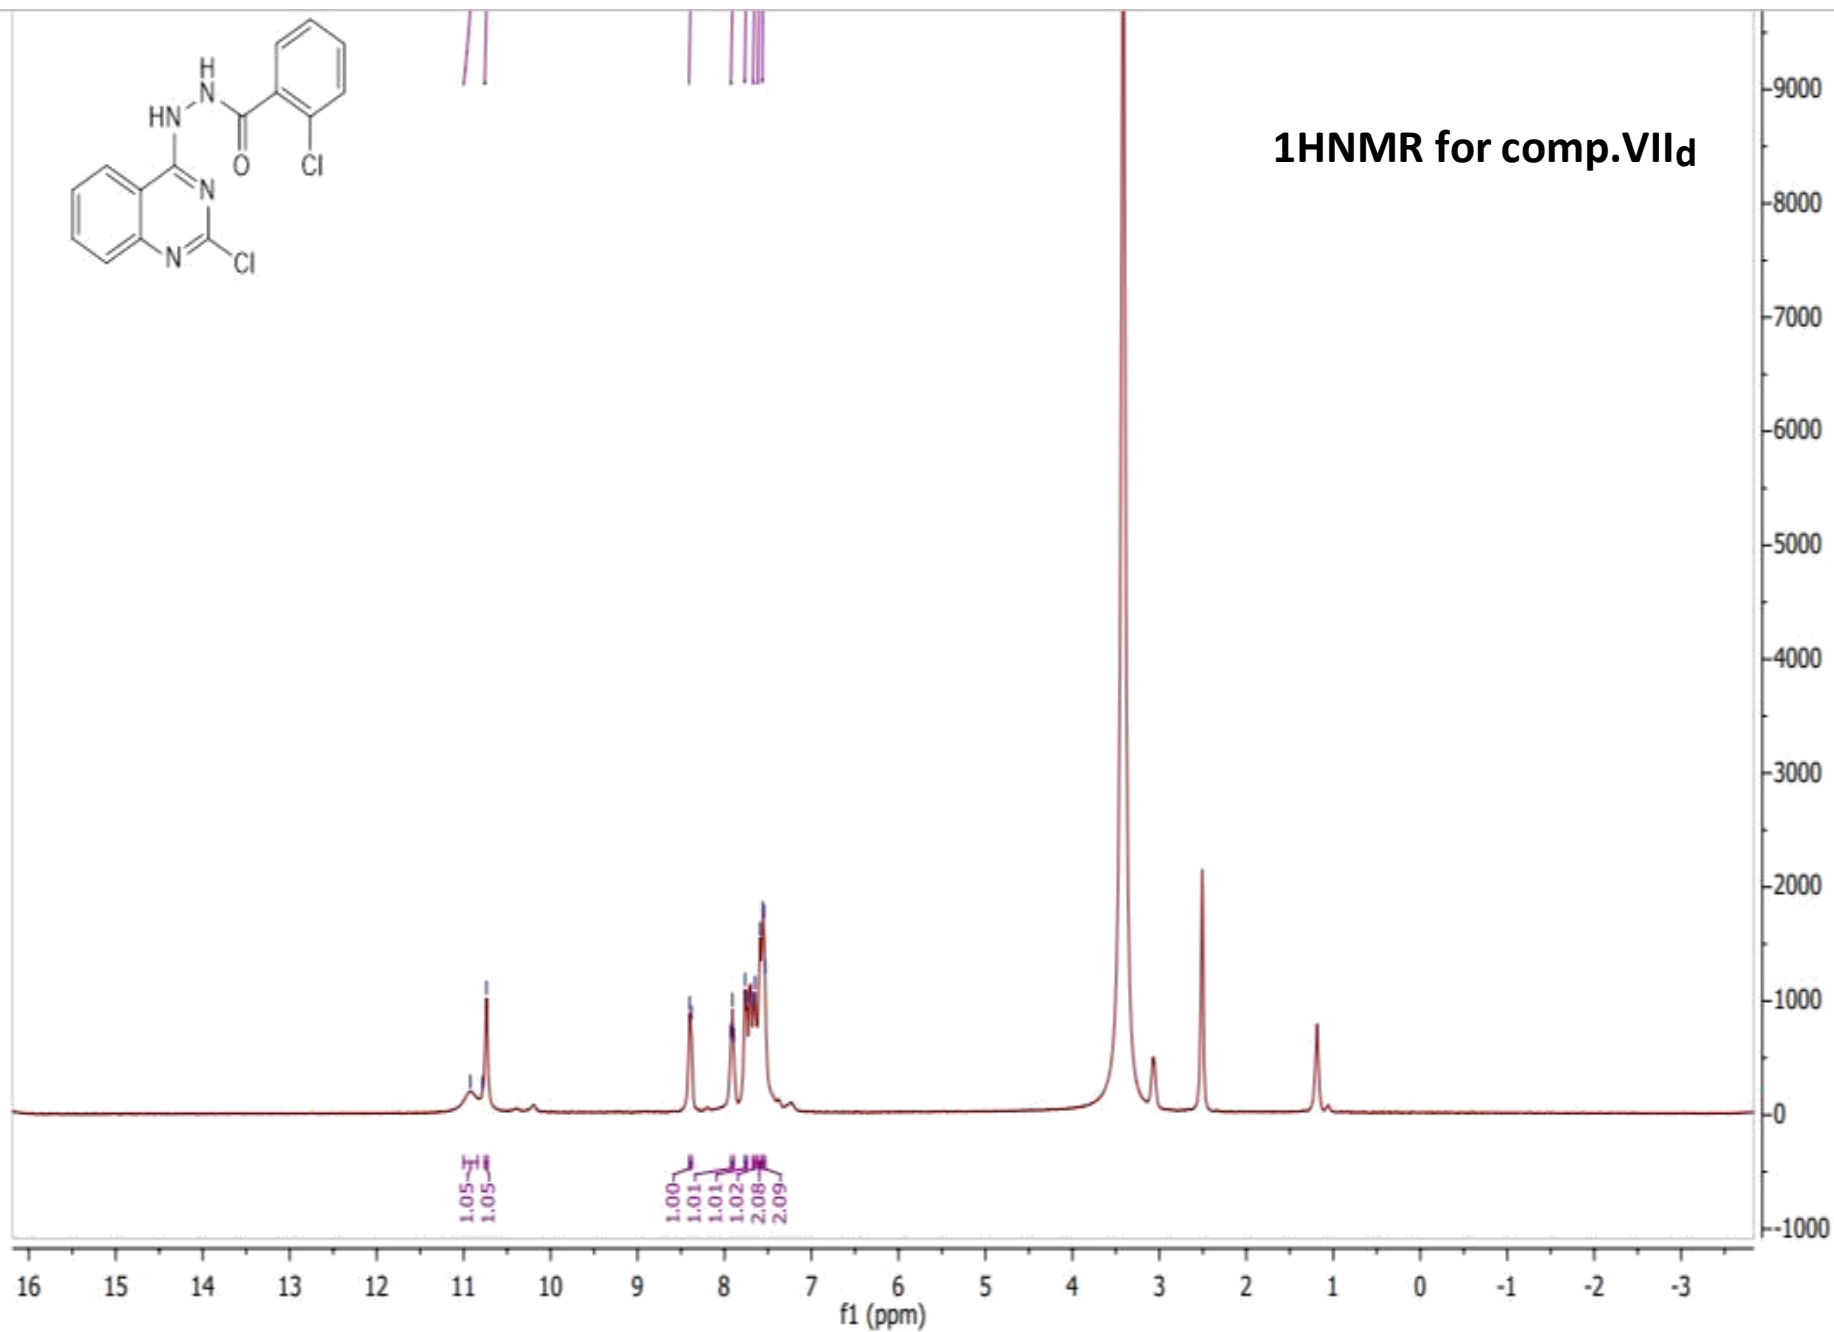

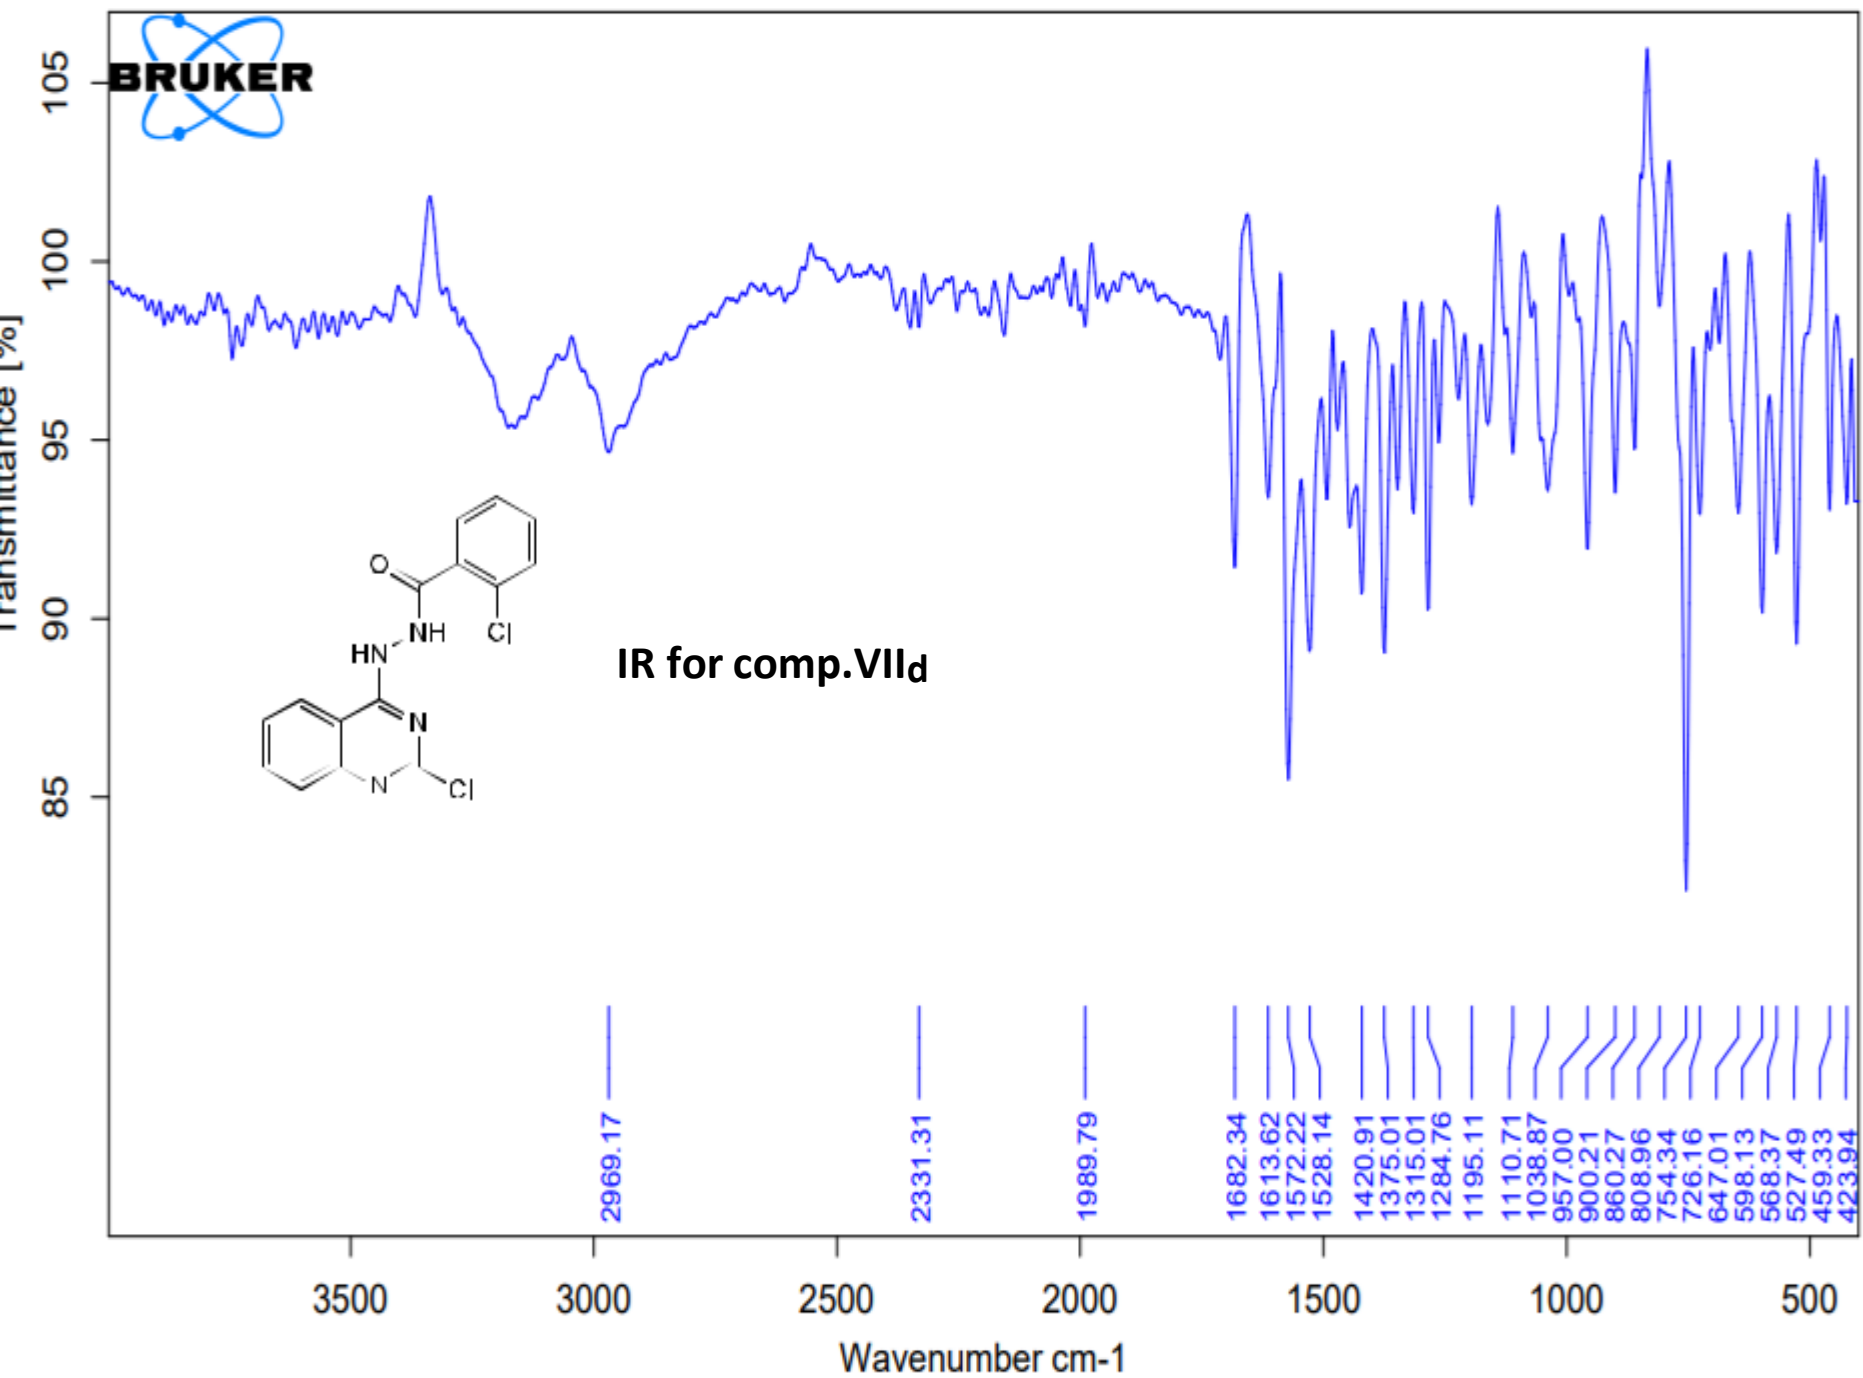

# **<sup>1</sup>H NMR for comp .XI**

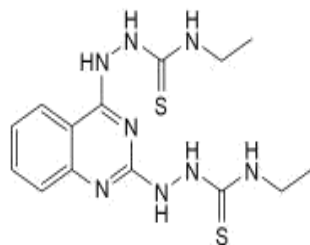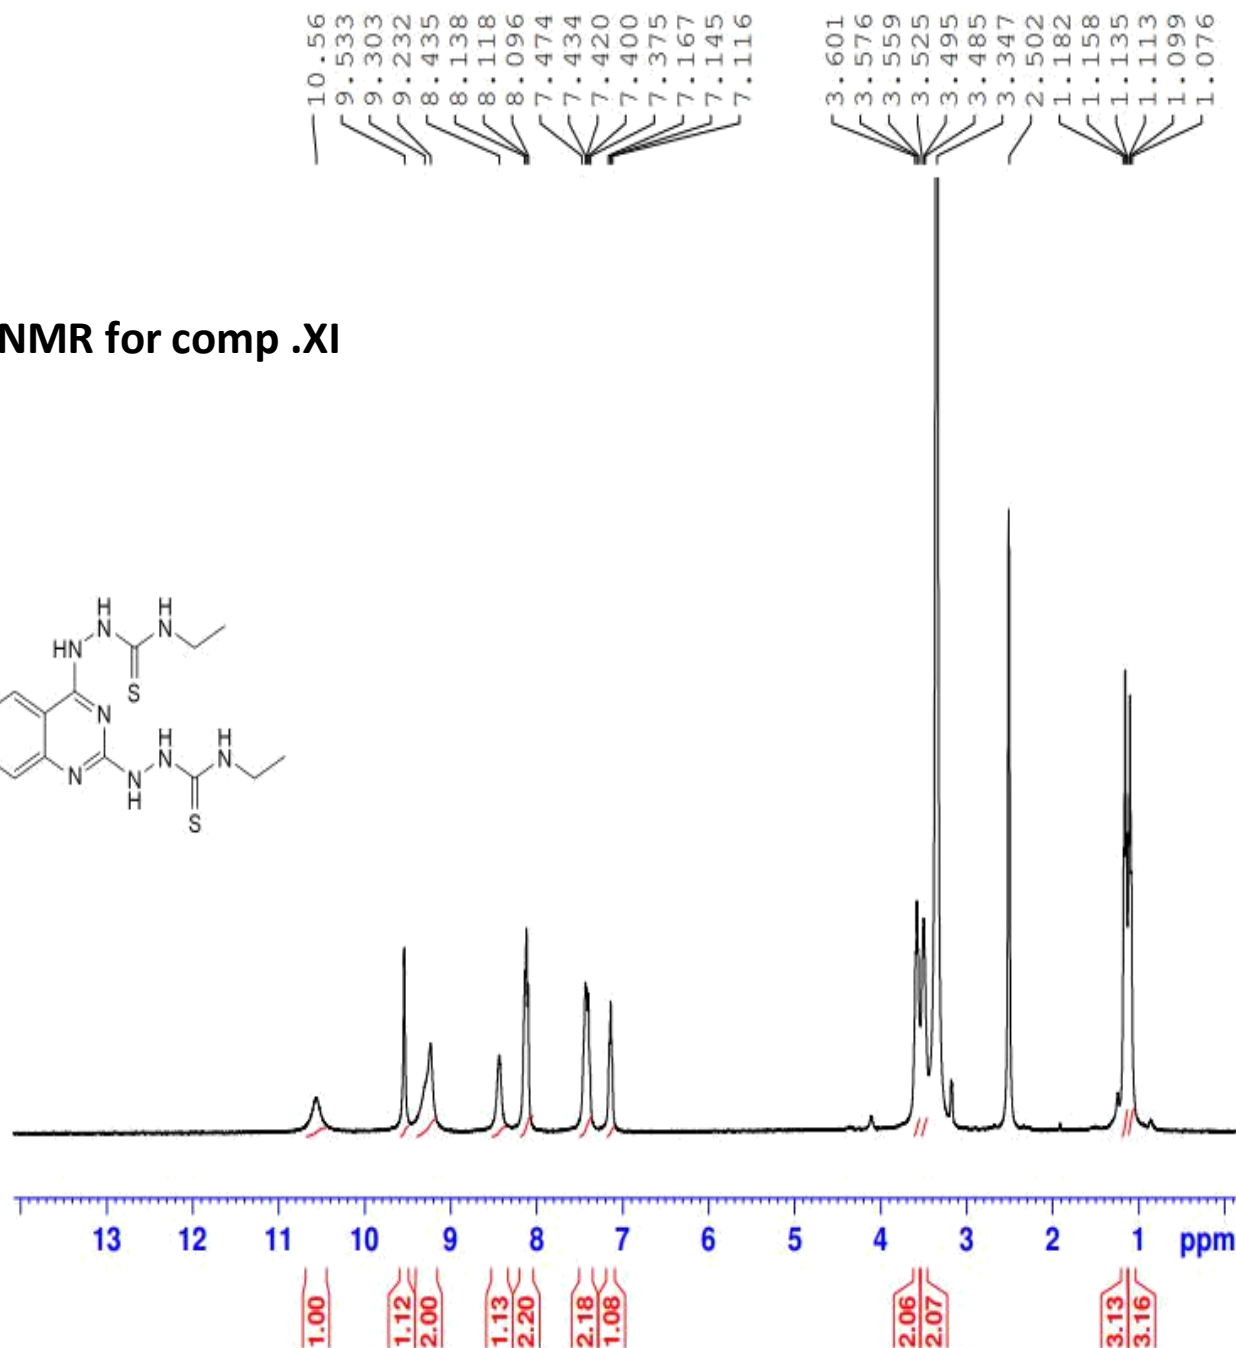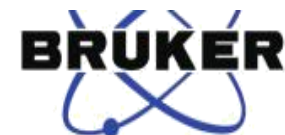

Current Data Parameters  
 NAME RRM-D4  
 EXPNO 2  
 PROCNO 1

F2 - Acquisition Parameters  
 Date\_ 20200224  
 Time 9.51  
 INSTRUM spect  
 PROBHD 5 mm PABBO BB/  
 PULPROG zg30  
 TD 65536  
 SOLVENT DMSO  
 NS 86  
 DS 2  
 SWH 8012.820 Hz  
 FIDRES 0.122266 Hz  
 AQ 4.0894465 sec  
 RG 205.37  
 DW 62.400 usec  
 DE 6.50 usec  
 TE 298.0 K  
 D1 1.00000000 sec  
 TDO 1

===== CHANNEL f1 =====  
 SF01 400.1524711 MHz  
 NUC1 1H  
 P1 12.00 usec  
 PLW1 18.00000000 W

F2 - Processing parameters  
 SI 65536  
 SF 400.1500000 MHz  
 WDW EM  
 SSB 0  
 LB 0.30 Hz  
 GB 0  
 PC 1.00

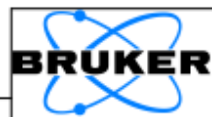

Transmittance [%]

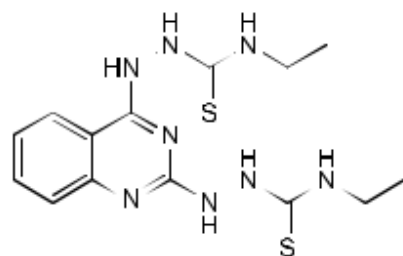

IR for comp .XI

3345.64

3199.34

2971.97

1619.52

1536.70

1460.25

1314.98

1234.48

1169.66

1054.84

836.77

753.08

653.89

525.66

465.96

3500

3000

2500

2000

1500

1000

500

Wavenumber cm-1

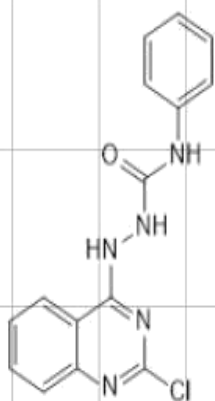

**<sup>1</sup>H NMR for comp. XII**

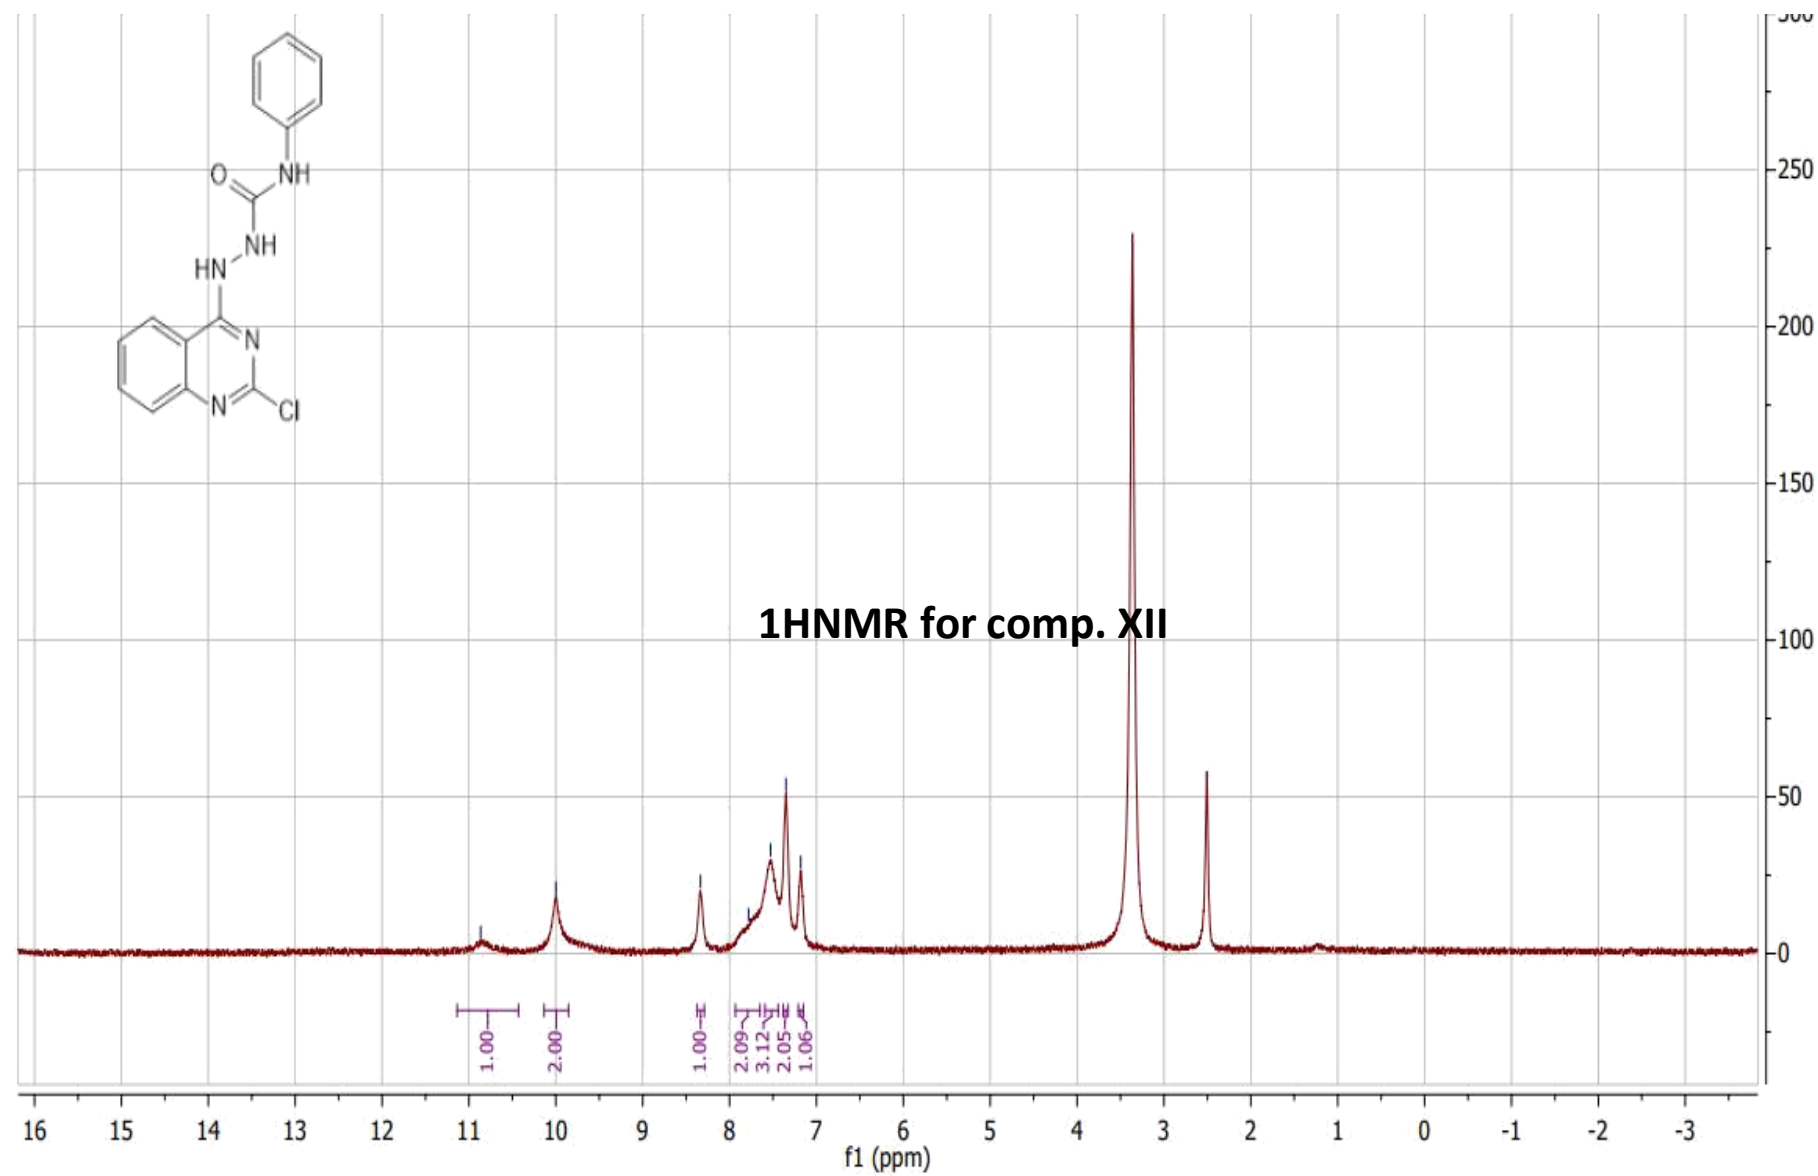



MM1-A3.1.fid

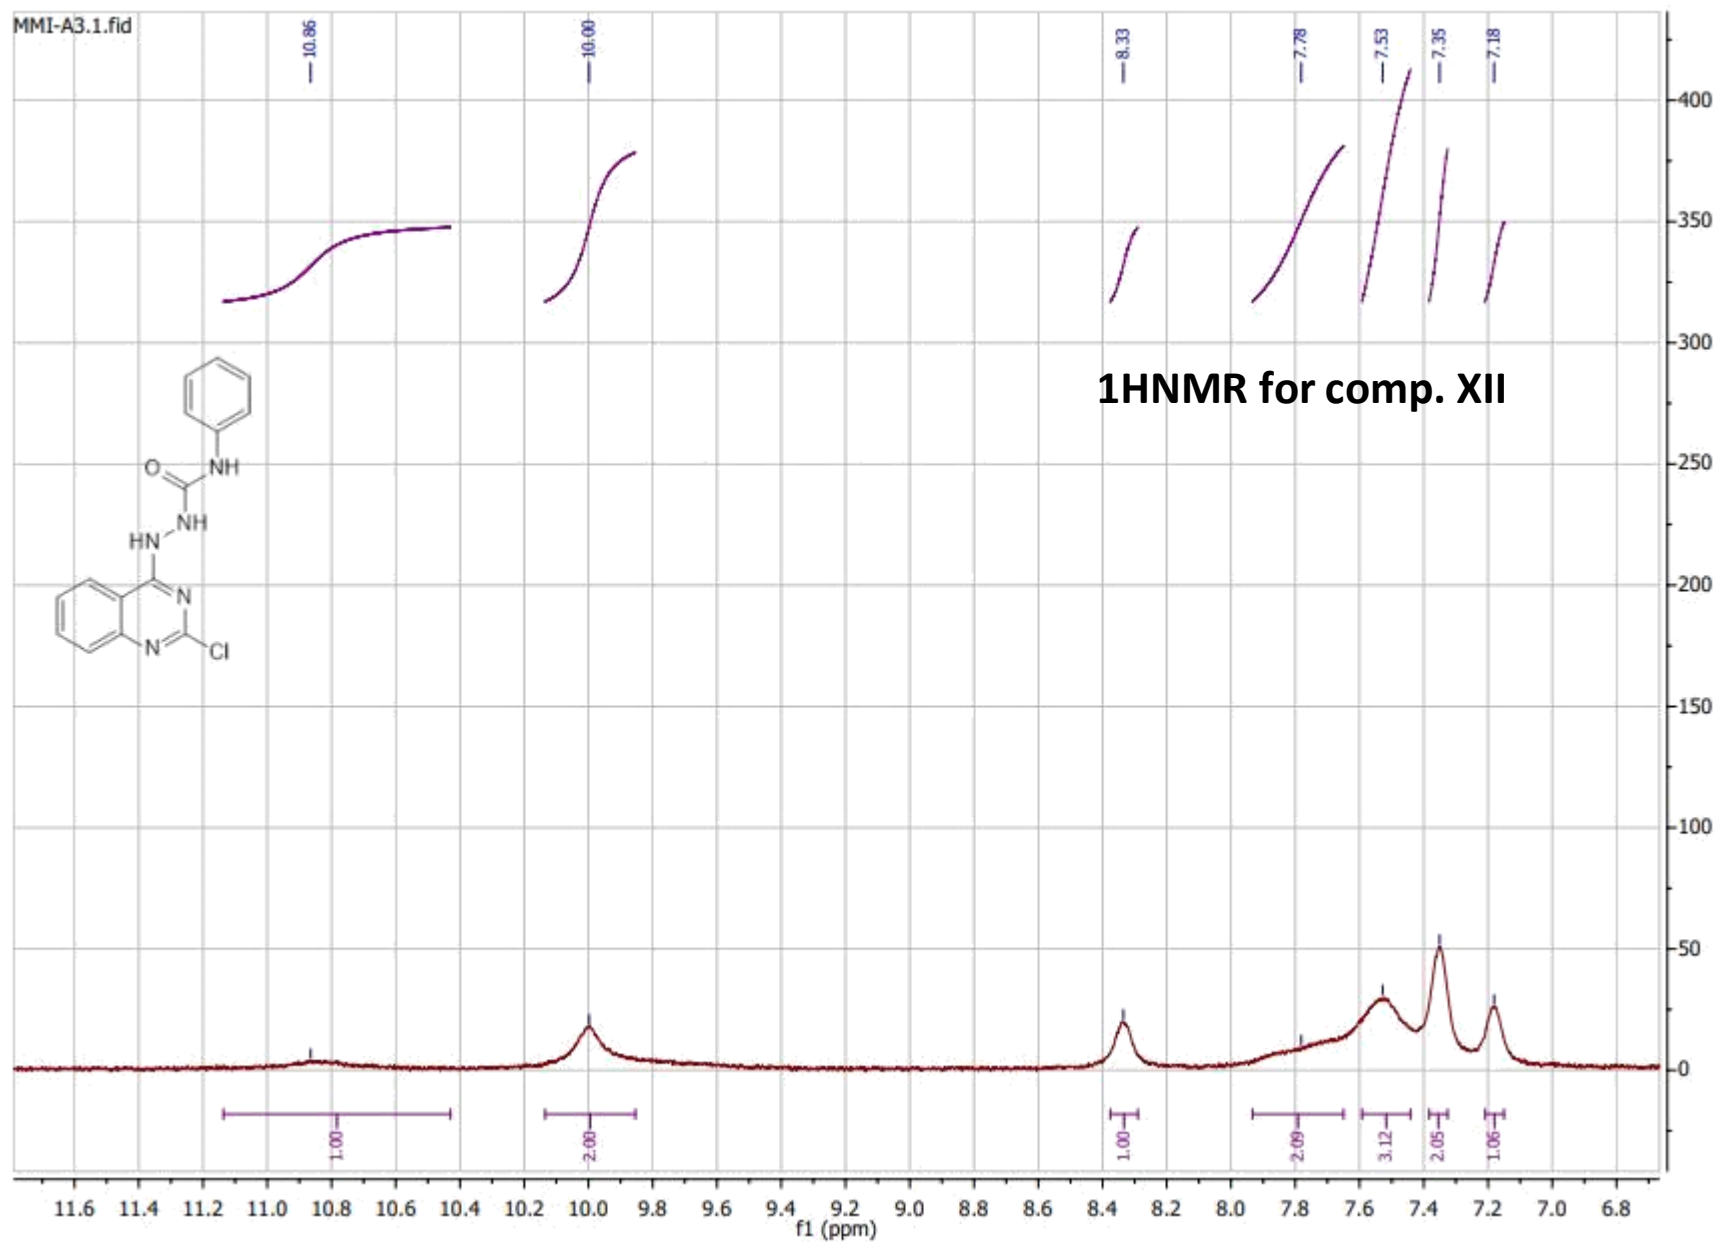

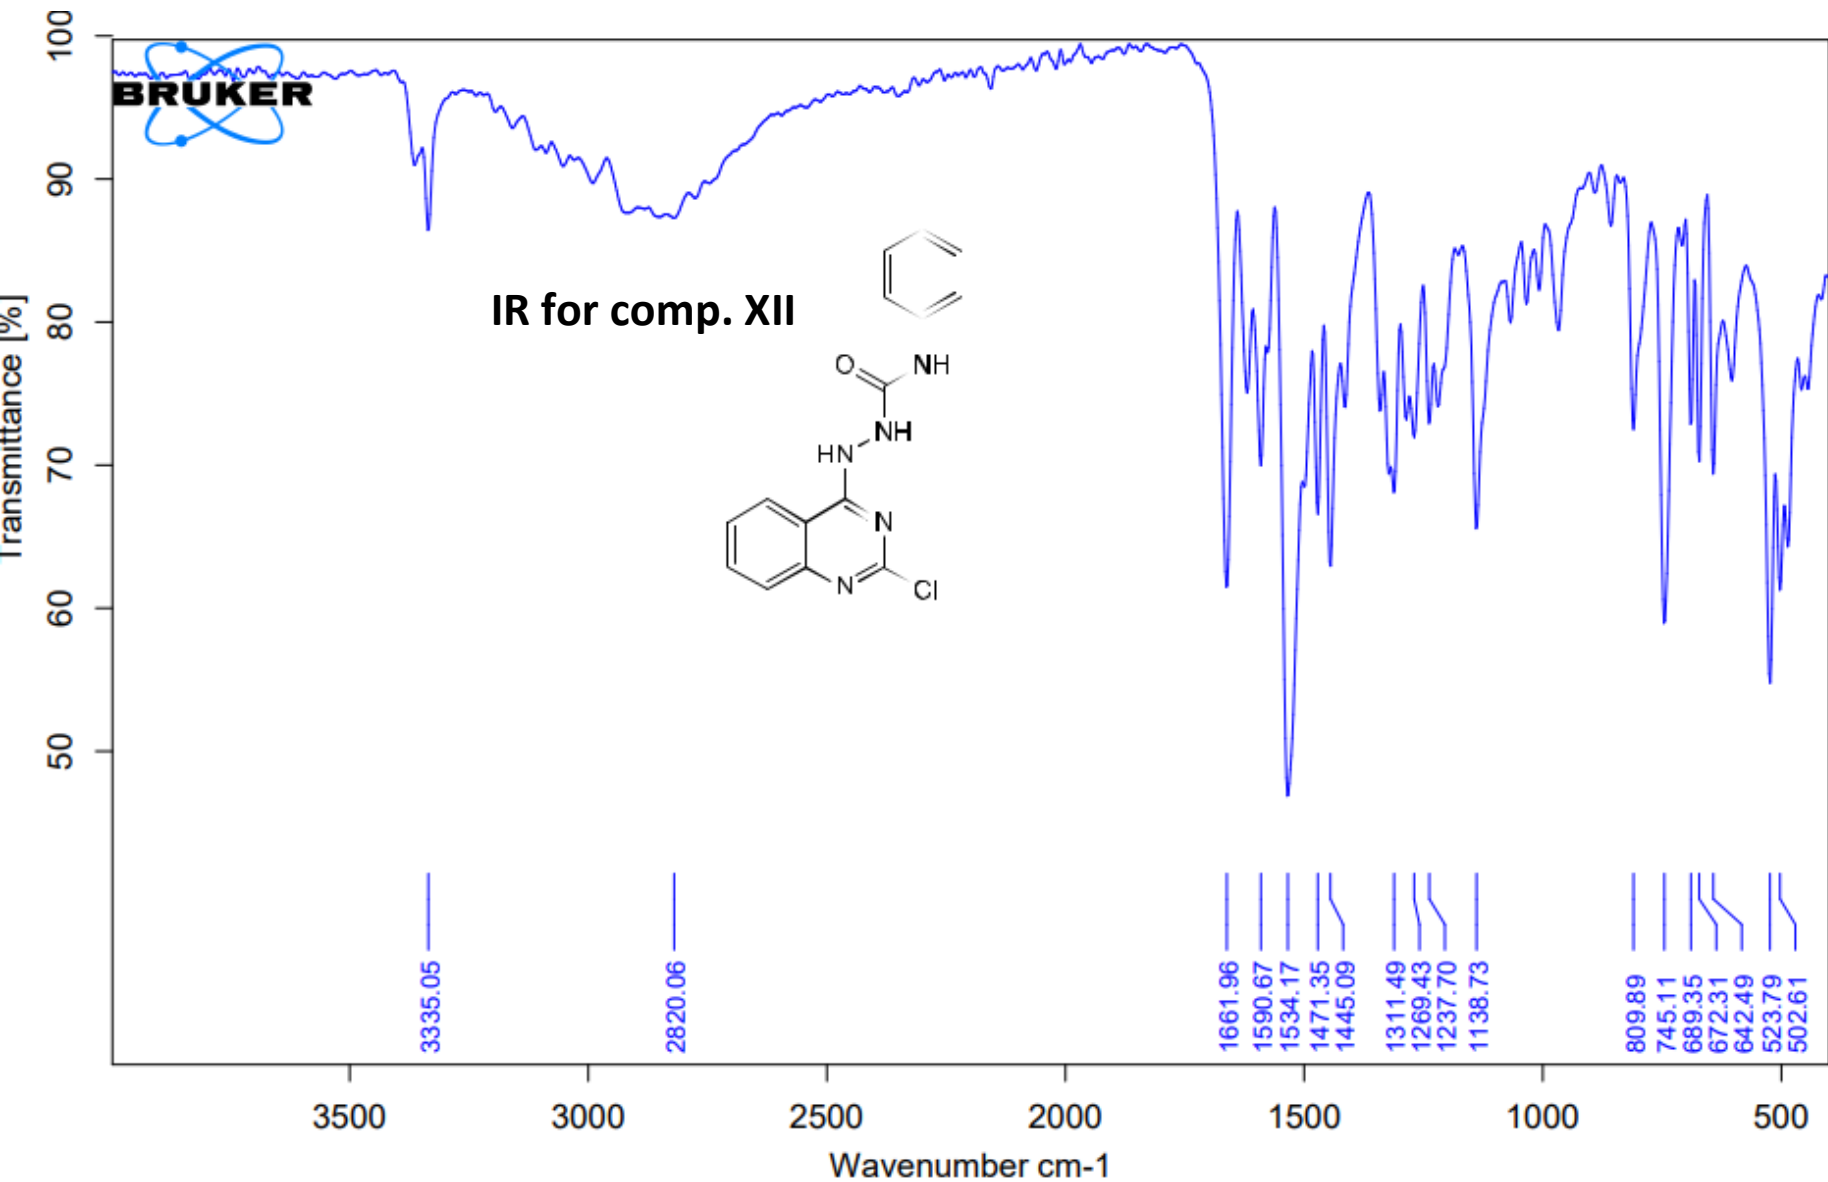

RRM-B11.1.fid

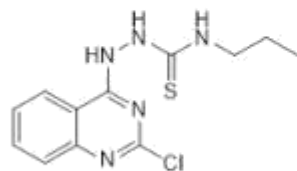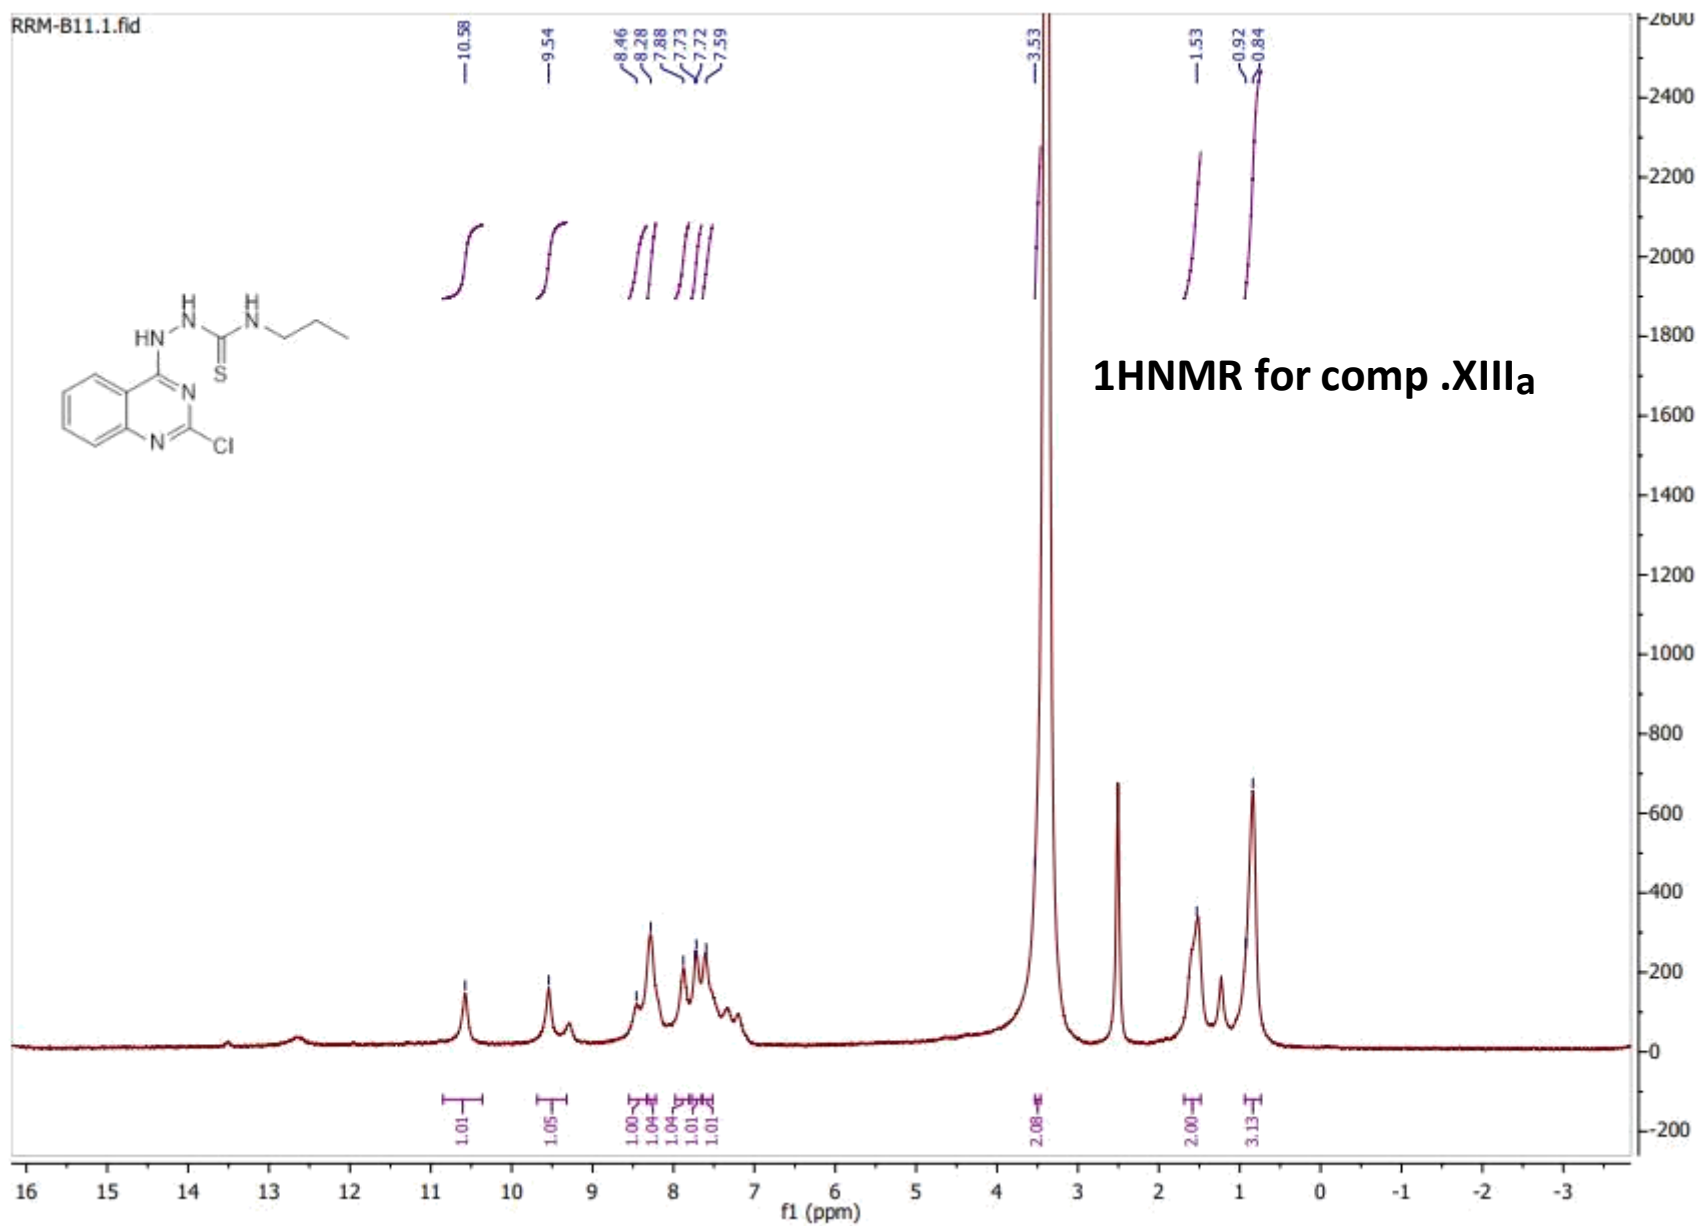

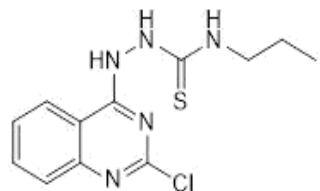

**<sup>1</sup>H NMR for comp.XIIIa**

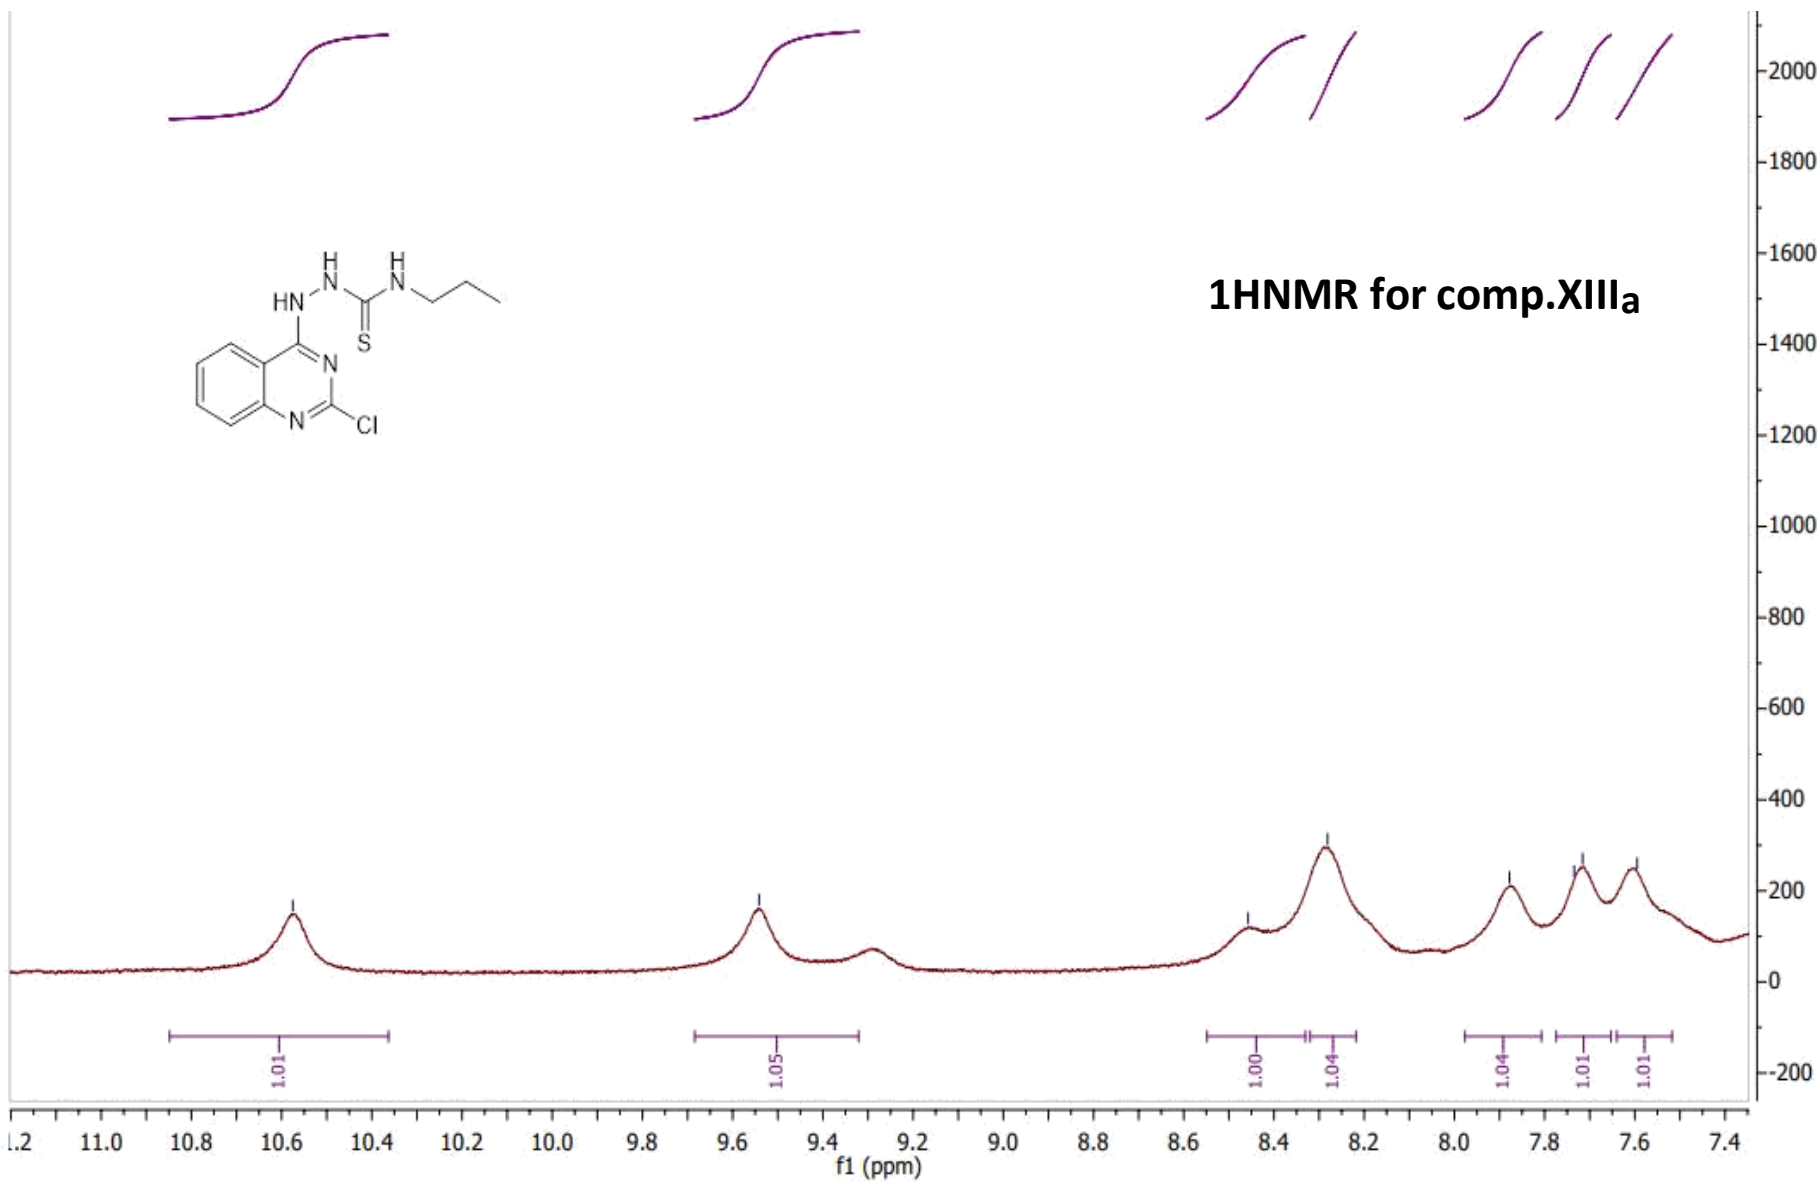

RRM-B111.1.fid

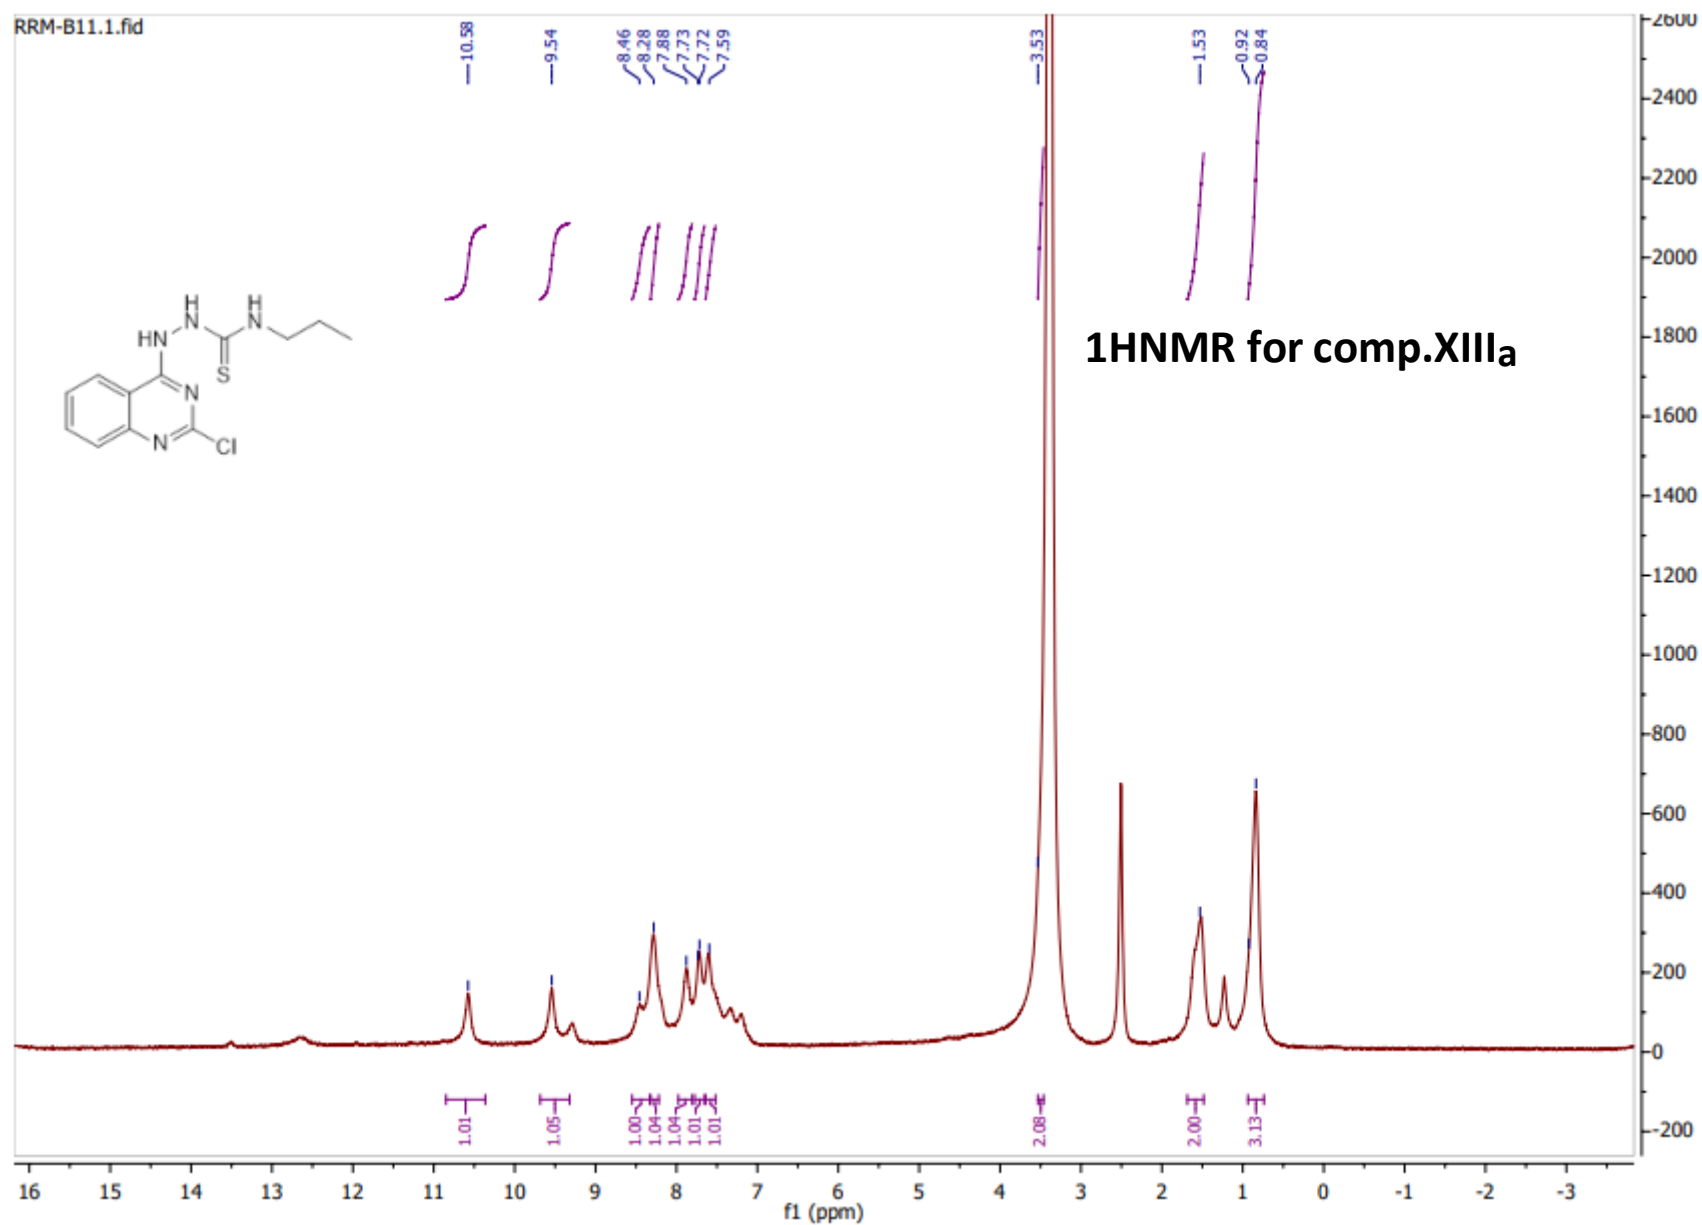

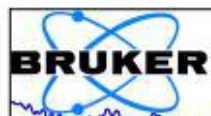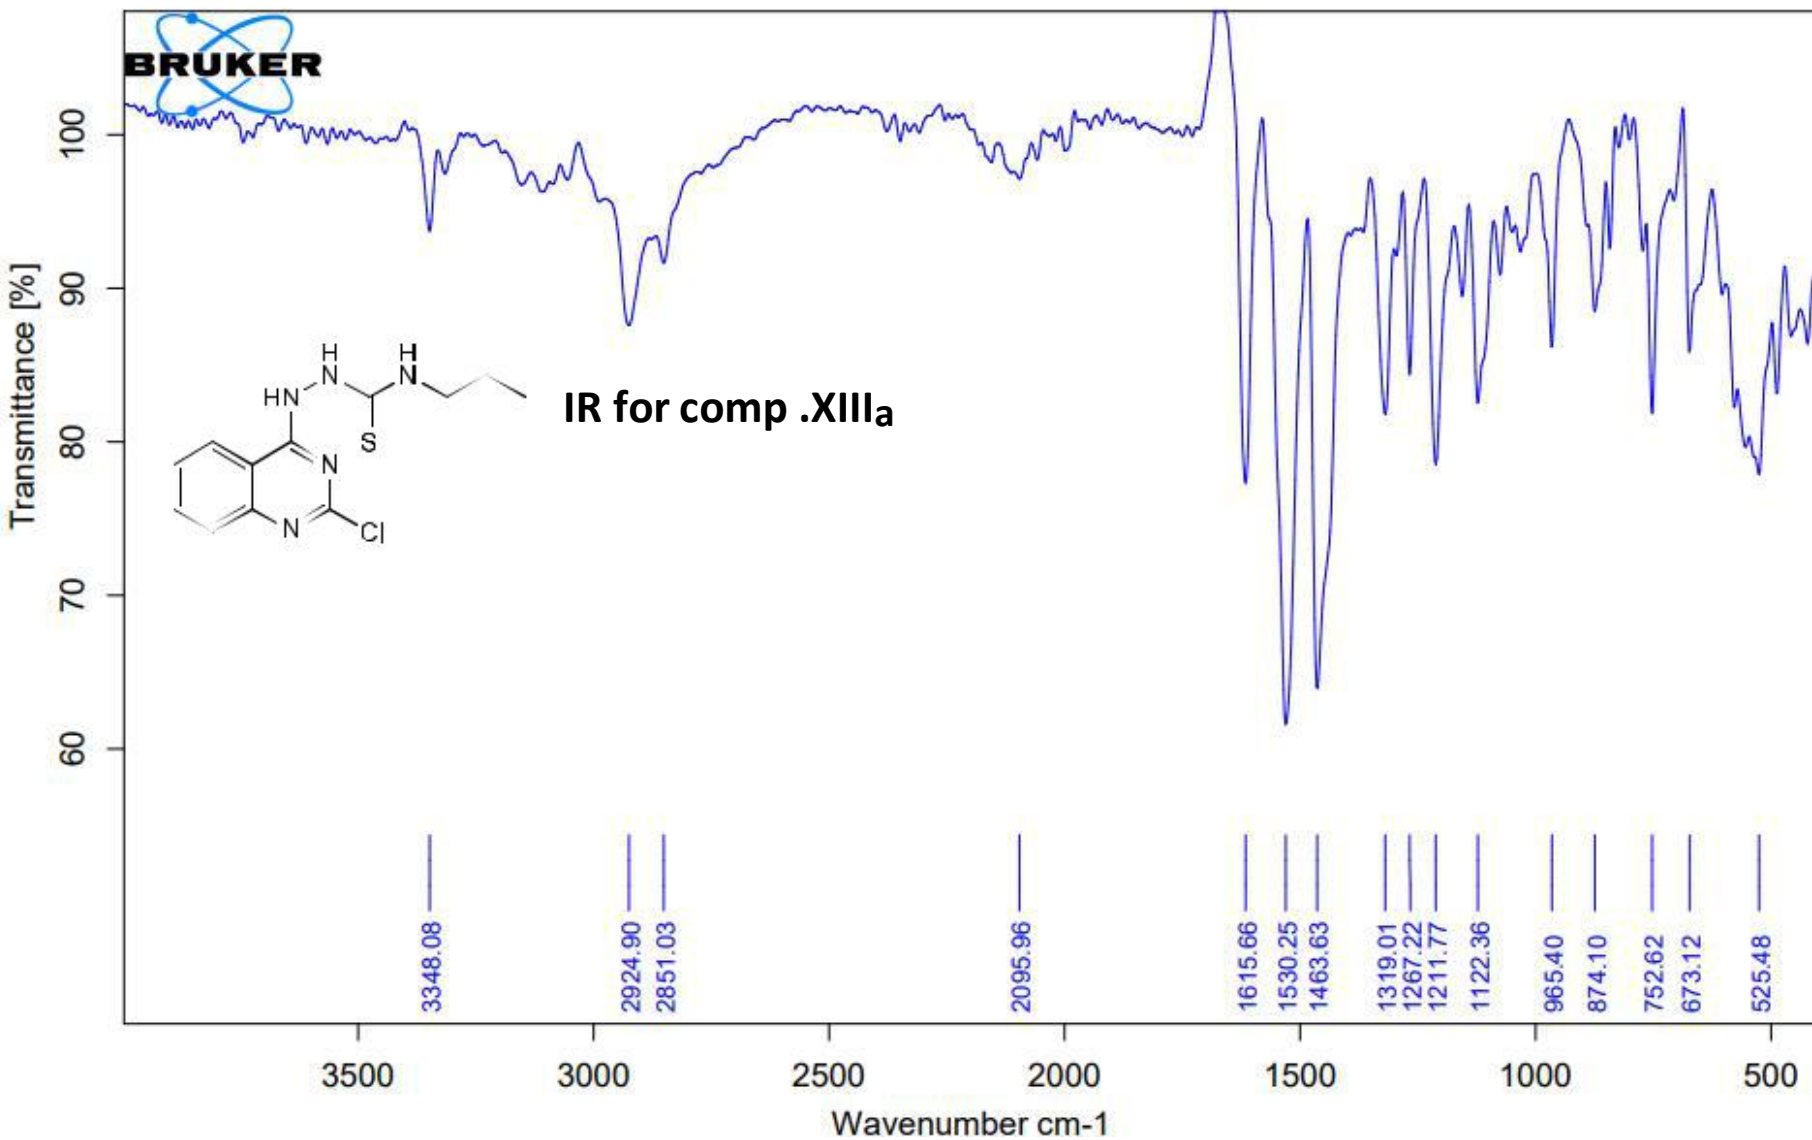

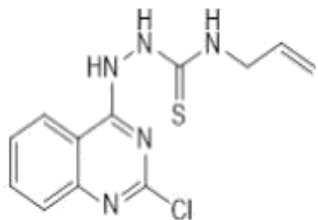

1HNMR for comp.XIIIb

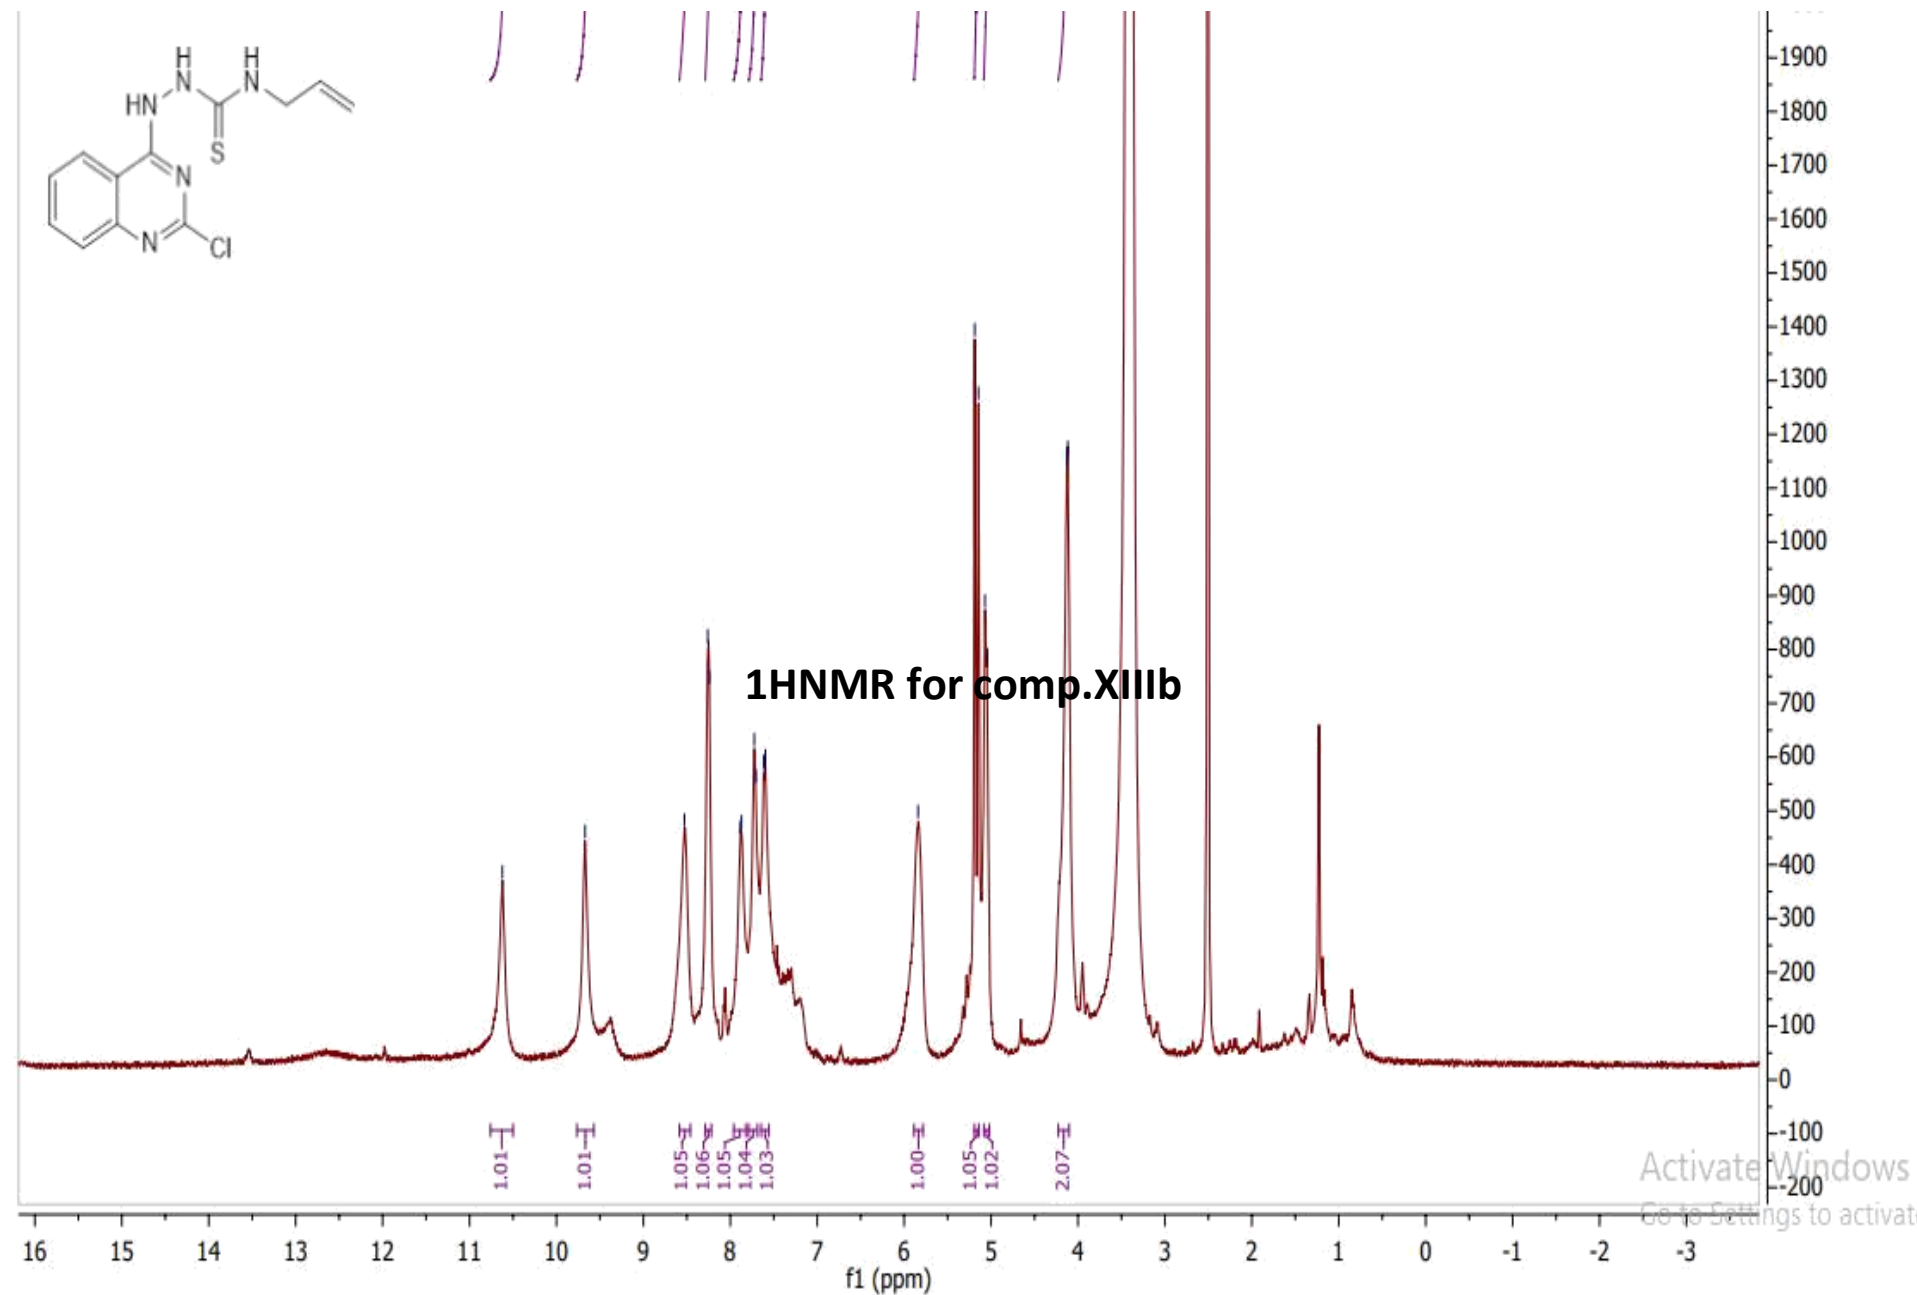

RRM-B12.1.fid

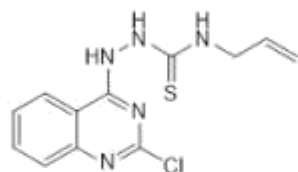

# HNMR for comp.XIIIb

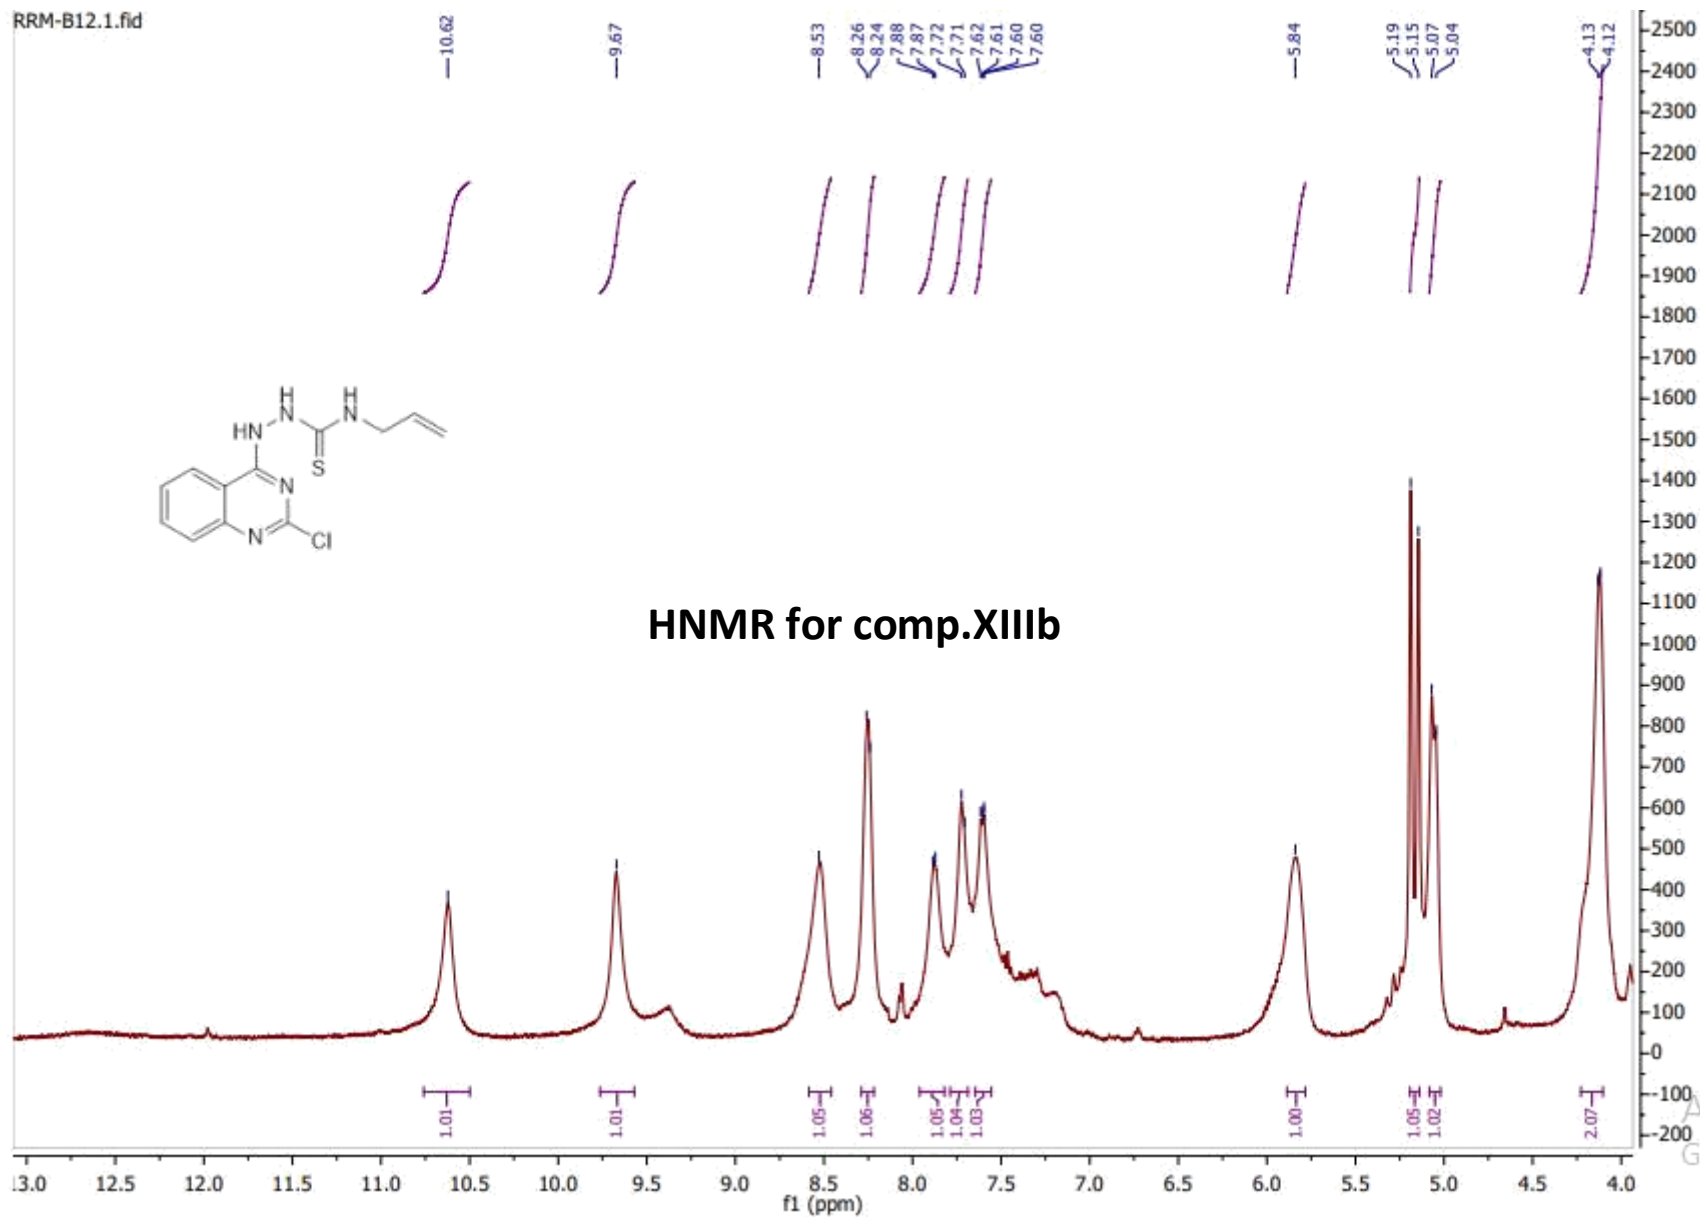



RRM-B12.2.fid

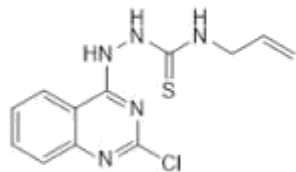

C13NMR for comp. XIIIb

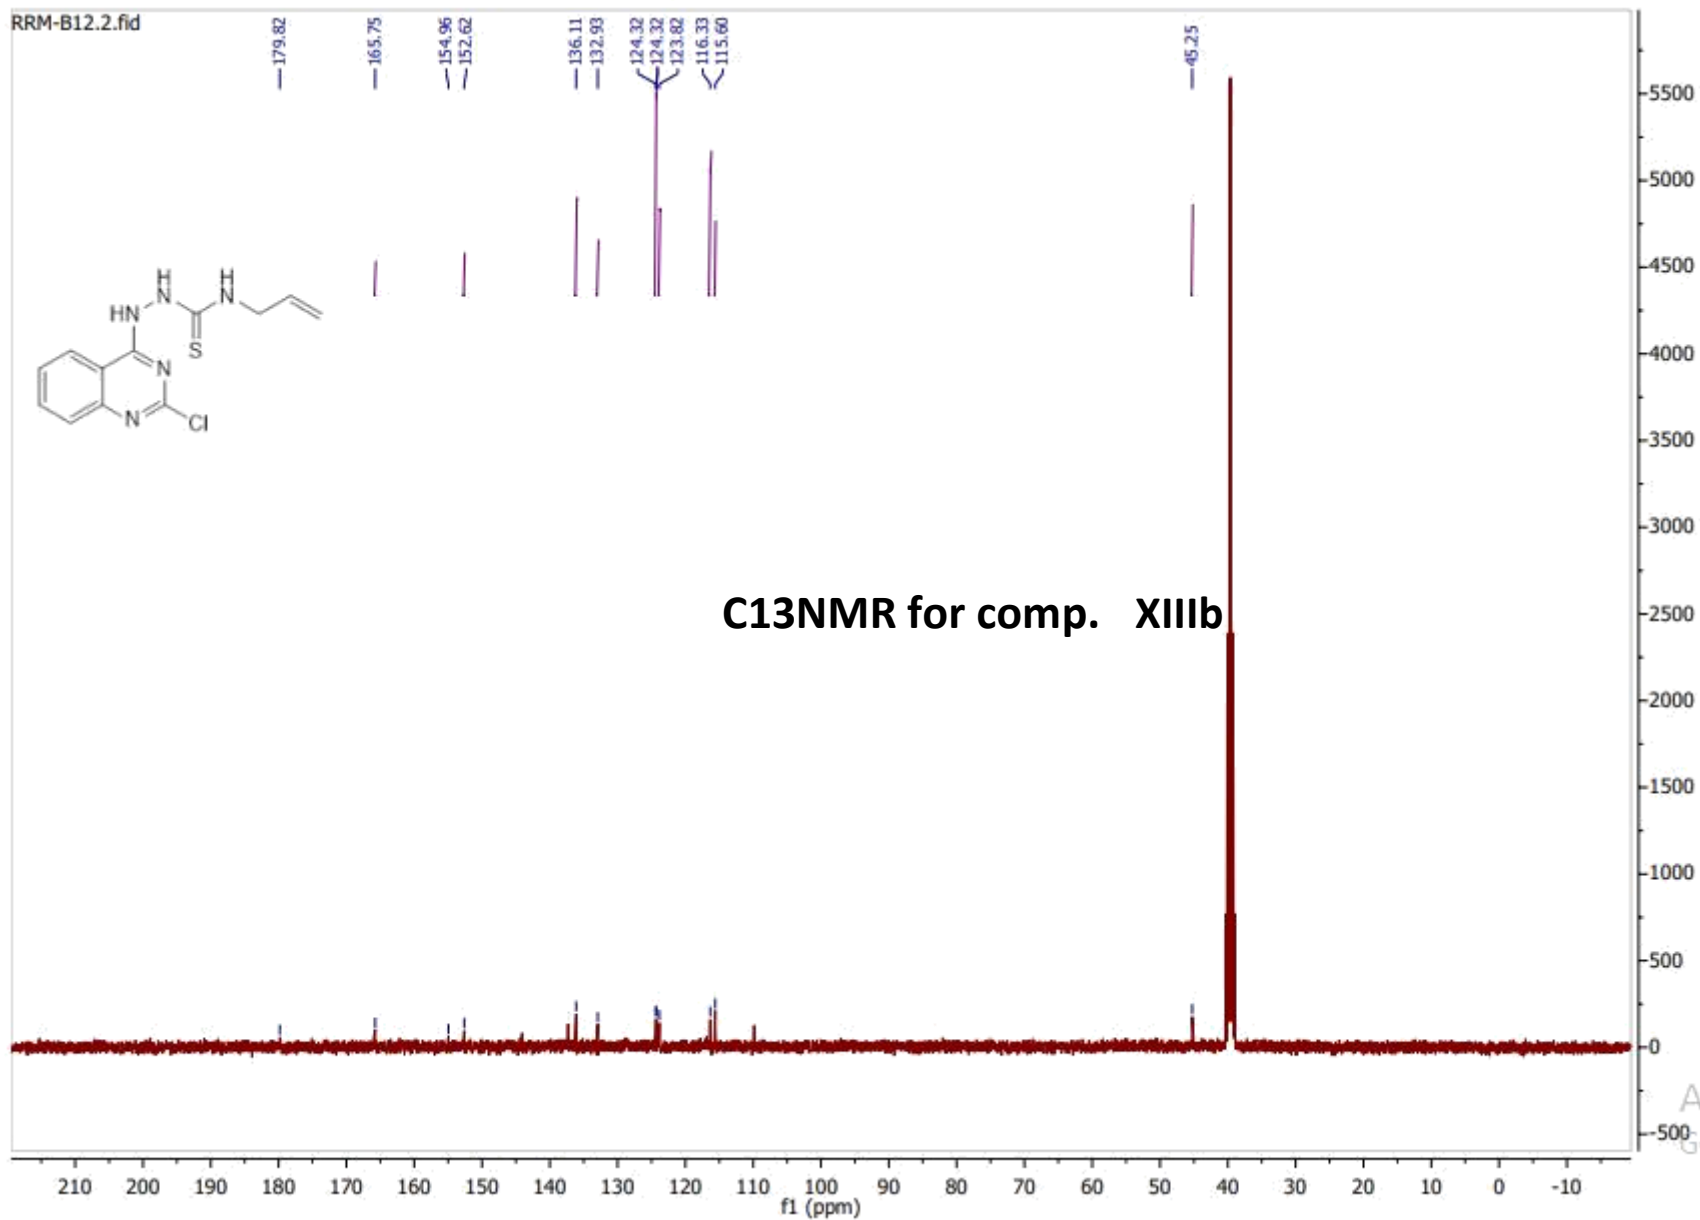

Active  
Go to S

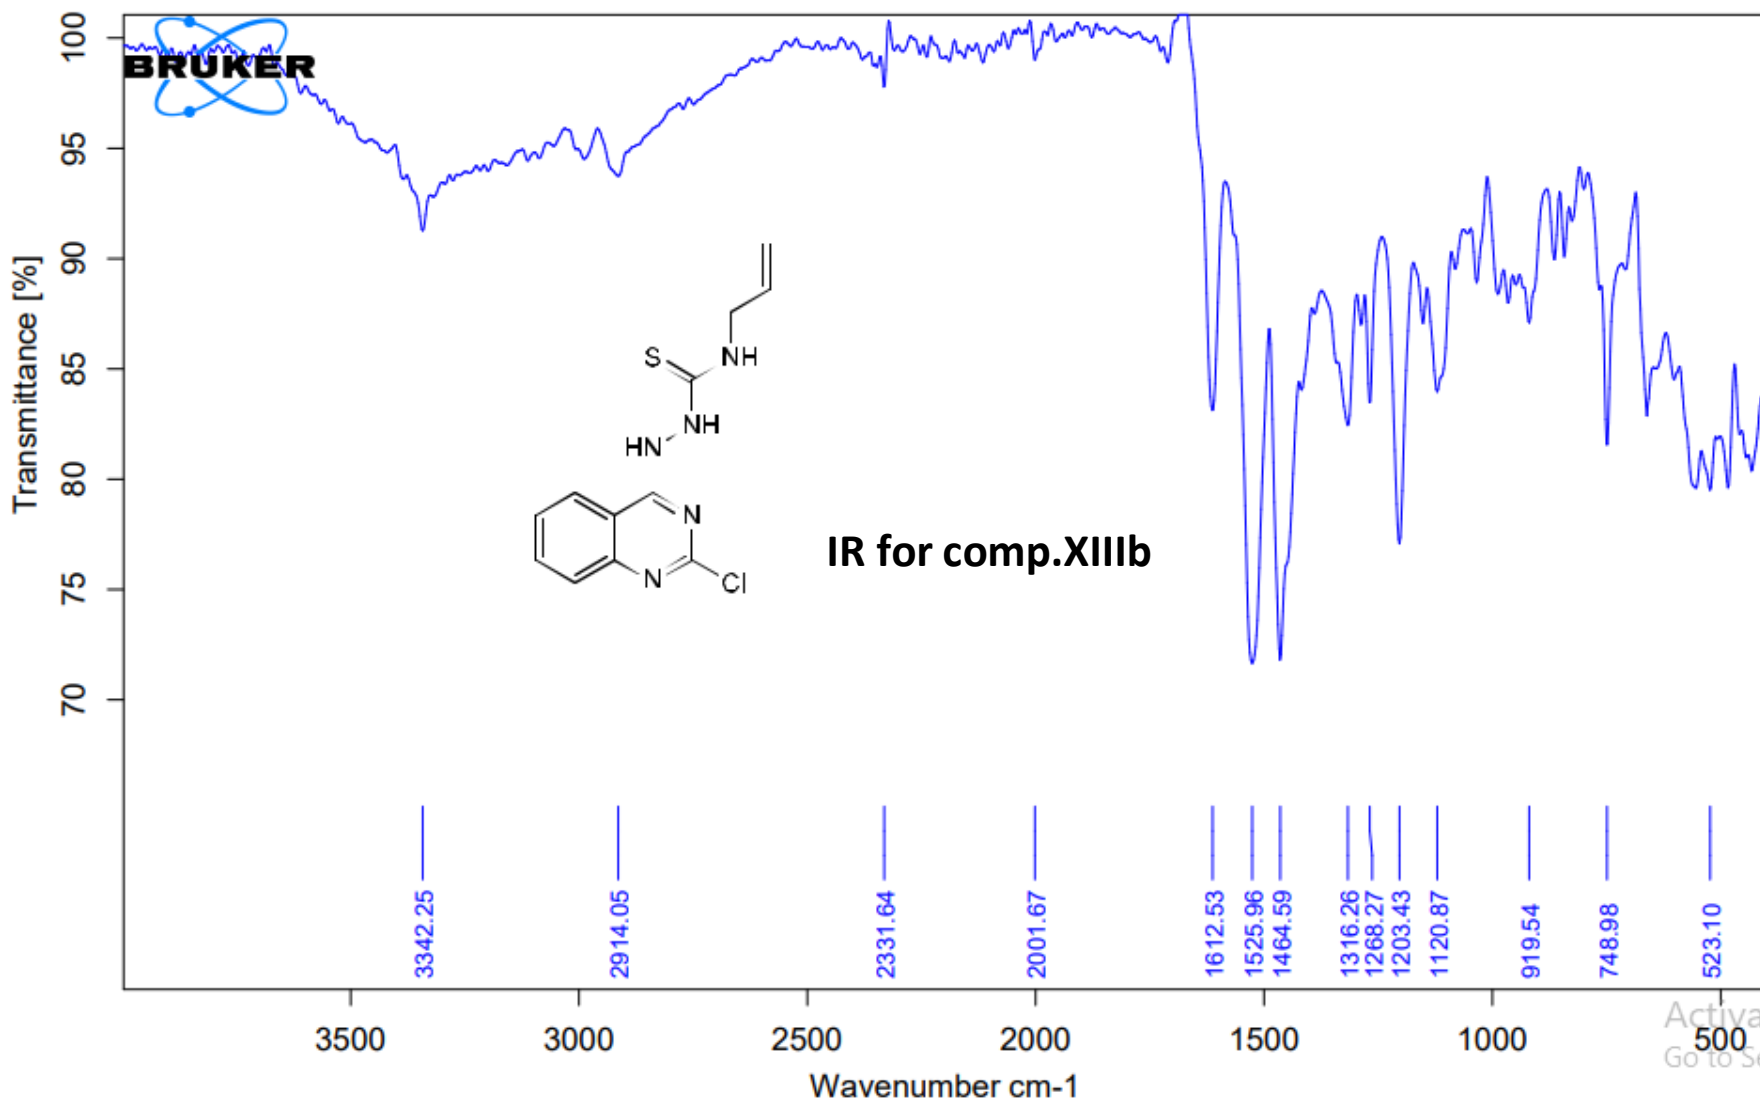

# **<sup>1</sup>H NMR for comp. XIIIId**

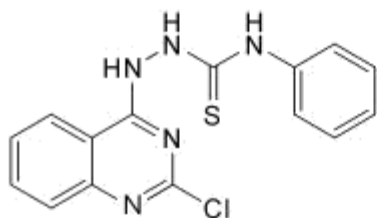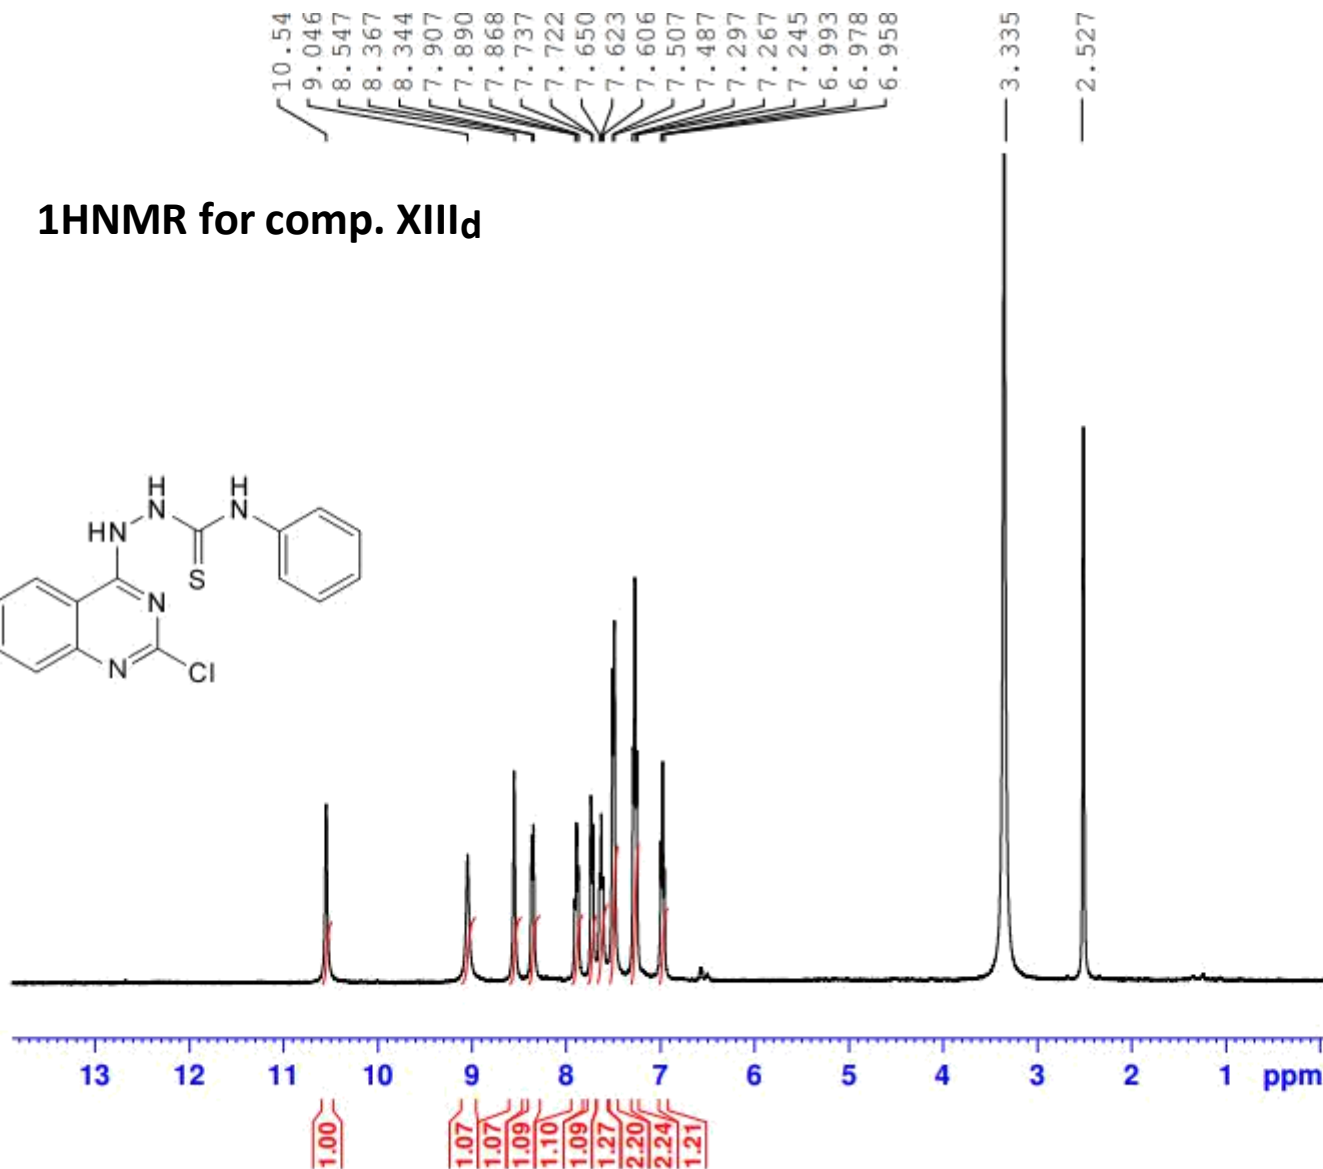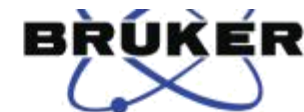

Current Data Parameters  
 NAME Al-Eb-9Ph-iso  
 EXPNO 1  
 PROCNO 1

F2 - Acquisition Parameters  
 Date\_ 20190822  
 Time 9.37  
 INSTRUM spect  
 PROBHD 5 mm PABBO BB/  
 PULPROG zg30  
 TD 65536  
 SOLVENT DMSO  
 NS 28  
 DS 2  
 SWH 8012.820 Hz  
 FIDRES 0.122266 Hz  
 AQ 4.0894465 sec  
 RG 205.37  
 DW 62.400 usec  
 DE 6.50 usec  
 TE 298.0 K  
 D1 1.00000000 sec  
 TDO 1

----- CHANNEL f1 -----  
 SFO1 400.1524711 MHz  
 NUC1 1H  
 P1 12.00 usec  
 PLW1 18.00000000 W

F2 - Processing parameters  
 SI 65536  
 SF 400.1500000 MHz  
 WDW EM  
 SSB 0  
 LB 0.30 Hz  
 GB 0  
 PC 1.00

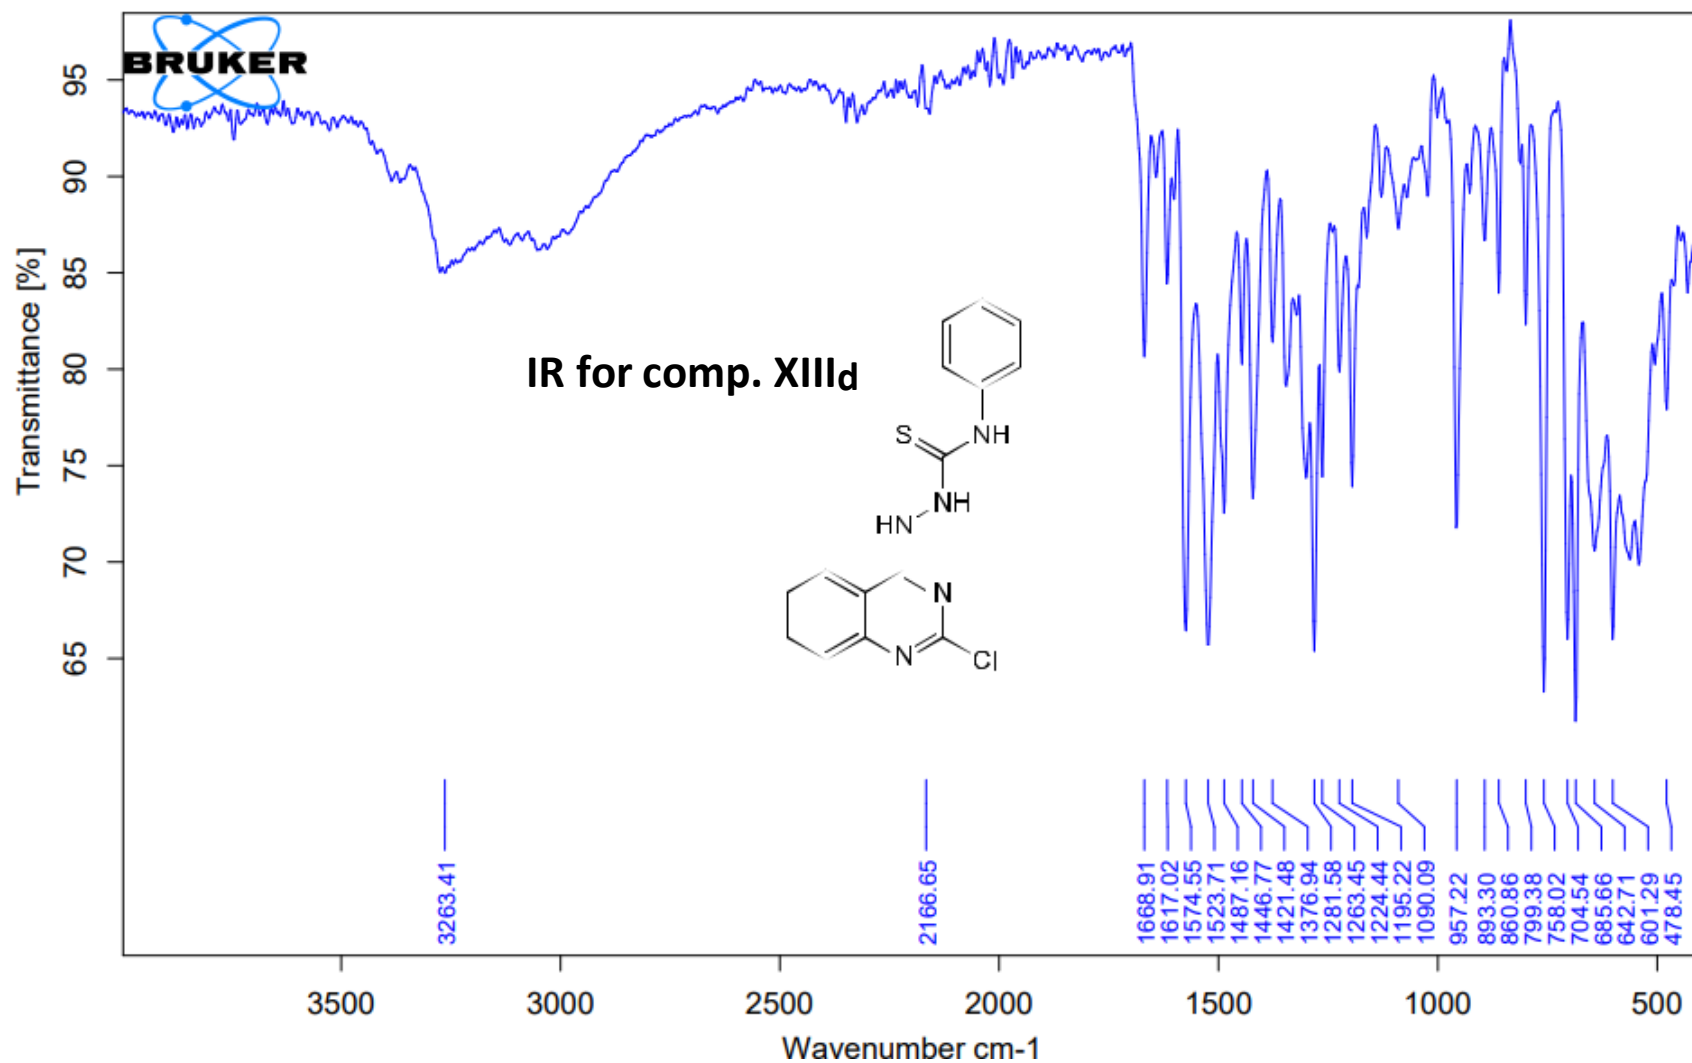

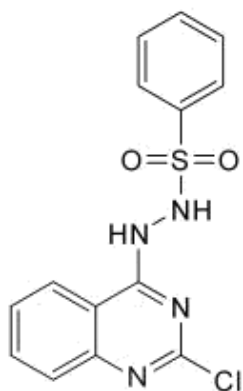

**<sup>1</sup>HNMR for comp. XIVa**

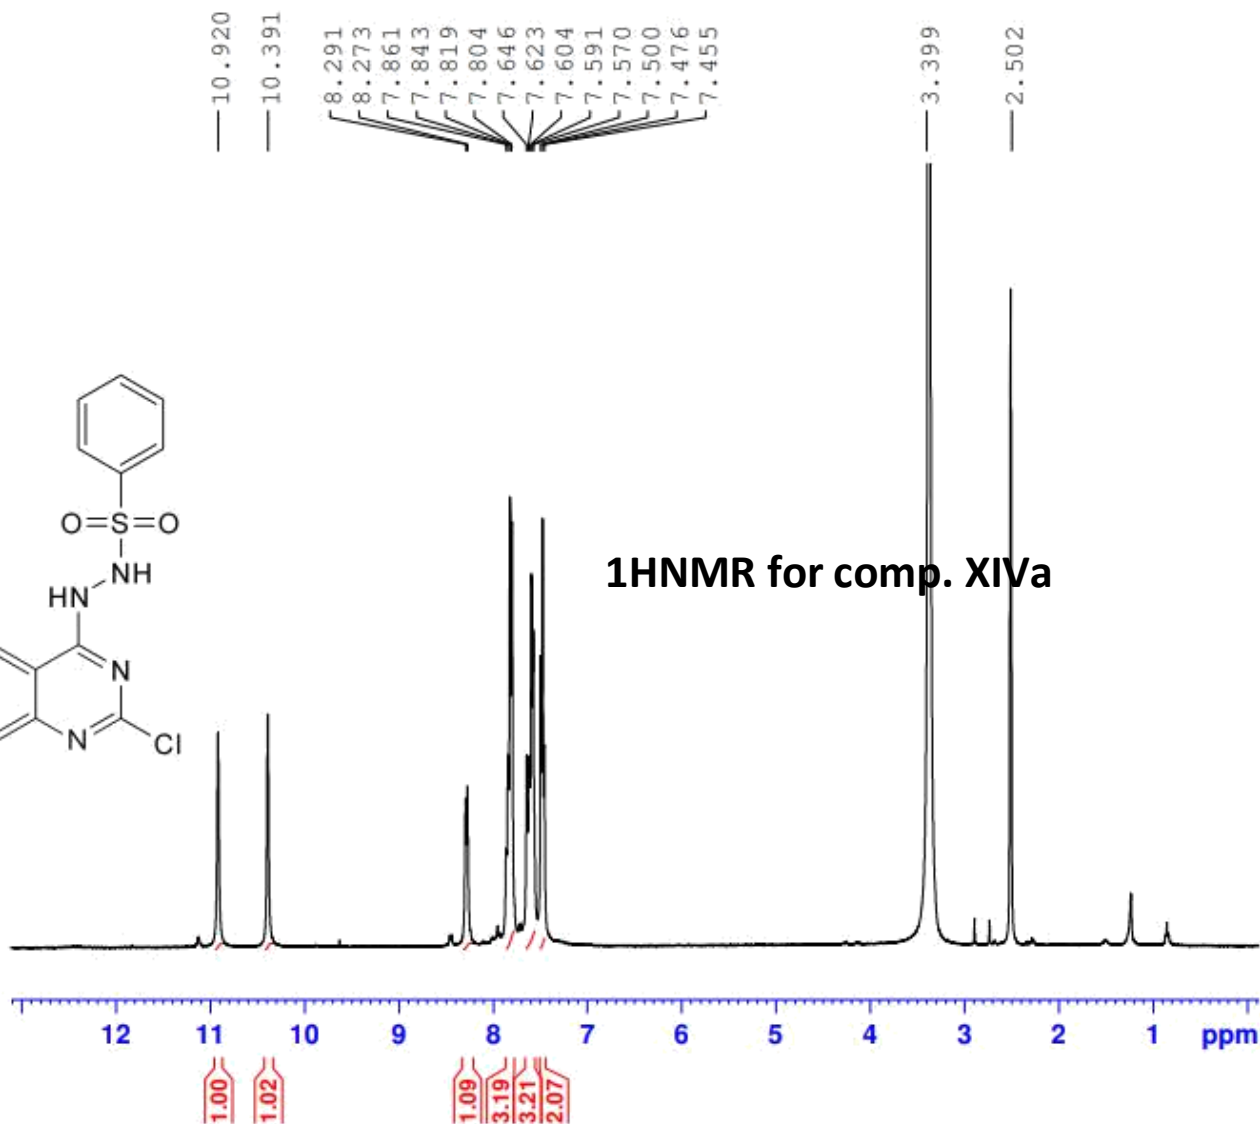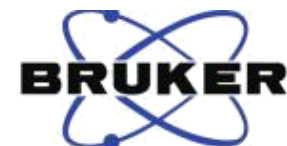

Current Data Parameters  
 NAME RRM-B3  
 EXPNO 1  
 PROCNO 1

F2 - Acquisition Parameters  
 Date\_ 20200116  
 Time 10.55  
 INSTRUM spect  
 PROBHD 5 mm PABBO BB/  
 PULPROG zg30  
 TD 65536  
 SOLVENT DMSO  
 NS 89  
 DS 2  
 SWH 8012.820 Hz  
 FIDRES 0.122266 Hz  
 AQ 4.0894465 sec  
 RG 205.37  
 DW 62.400 usec  
 DE 6.50 usec  
 TE 298.0 K  
 D1 1.00000000 sec  
 TD0 1

----- CHANNEL f1 -----  
 SFO1 400.1524711 MHz  
 NUC1 1H  
 P1 12.00 usec  
 PLW1 18.00000000 W

F2 - Processing parameters  
 SI 65536  
 SF 400.1500000 MHz  
 WDW EM  
 SSB 0  
 LB 0.30 Hz  
 GB 0  
 PC 1.00

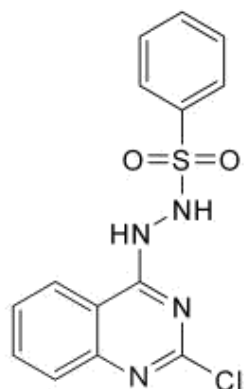

# HNMR for compound XIVa

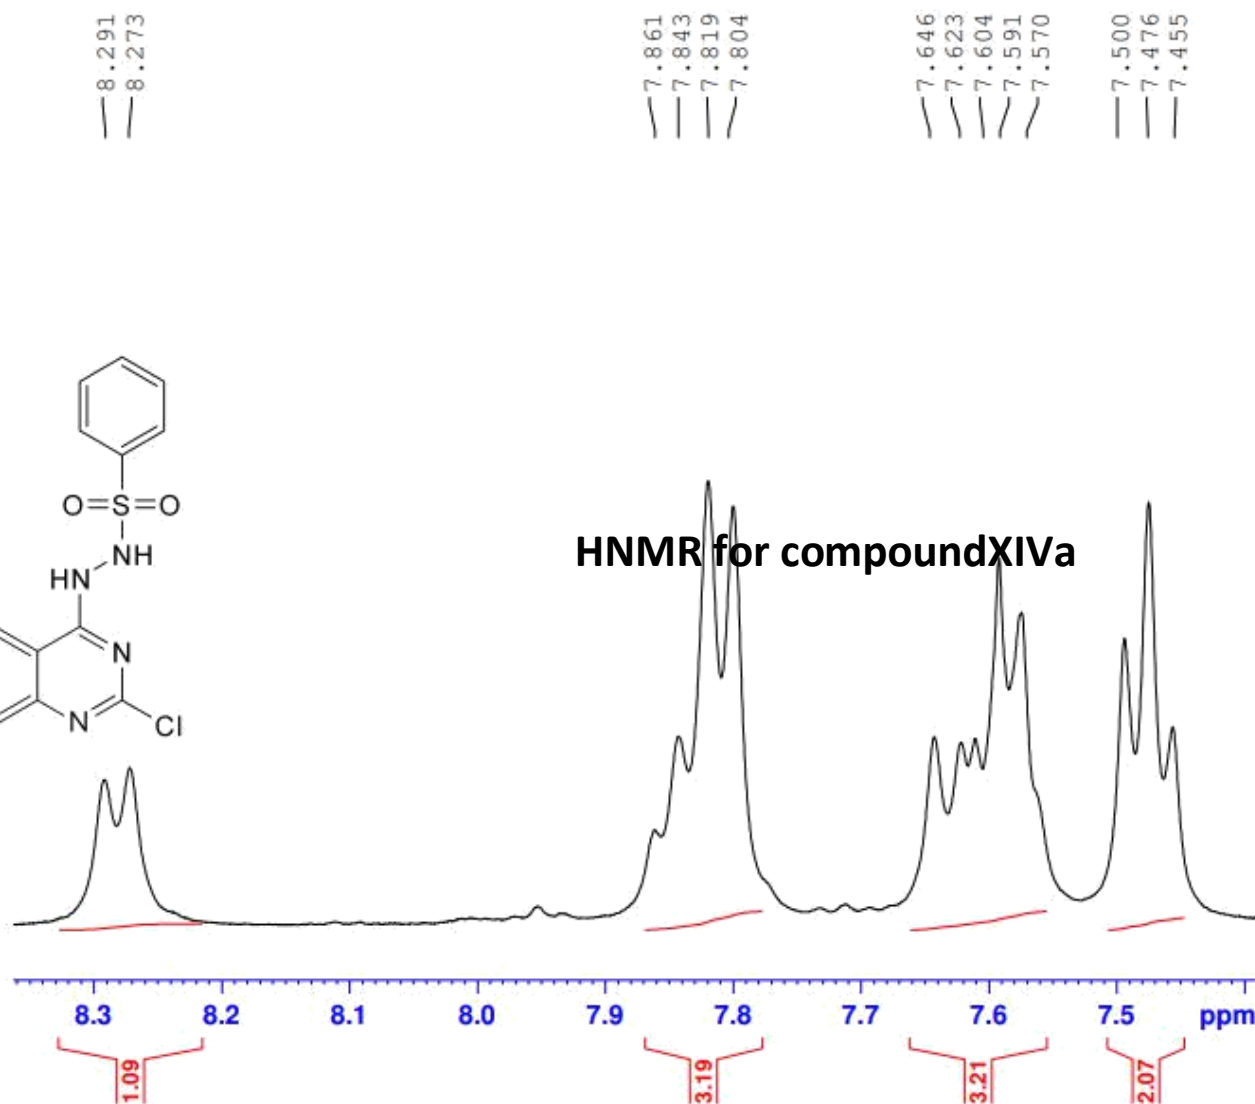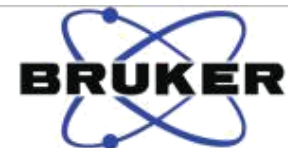

Current Data Parameters  
 NAME RRM-B3  
 EXPNO 1  
 PROCNO 1

F2 - Acquisition Parameters  
 Date\_ 20200116  
 Time 10.55  
 INSTRUM spect  
 PROBHD 5 mm PABBO BB/  
 PULPROG zg30  
 TD 65536  
 SOLVENT DMSO  
 NS 89  
 DS 2  
 SWH 8012.820 Hz  
 FIDRES 0.122266 Hz  
 AQ 4.0894465 sec  
 RG 205.37  
 DW 62.400 usec  
 DE 6.50 usec  
 TE 298.0 K  
 D1 1.00000000 sec  
 TD0 1

----- CHANNEL f1 -----  
 SFO1 400.1524711 MHz  
 NUC1 1H  
 P1 12.00 usec  
 PLW1 18.00000000 W

F2 - Processing parameters  
 SI 65536  
 SF 400.1500000 MHz  
 WDW EM  
 SSB 0  
 LB 0.30 Hz  
 GB 0  
 PC 1.00

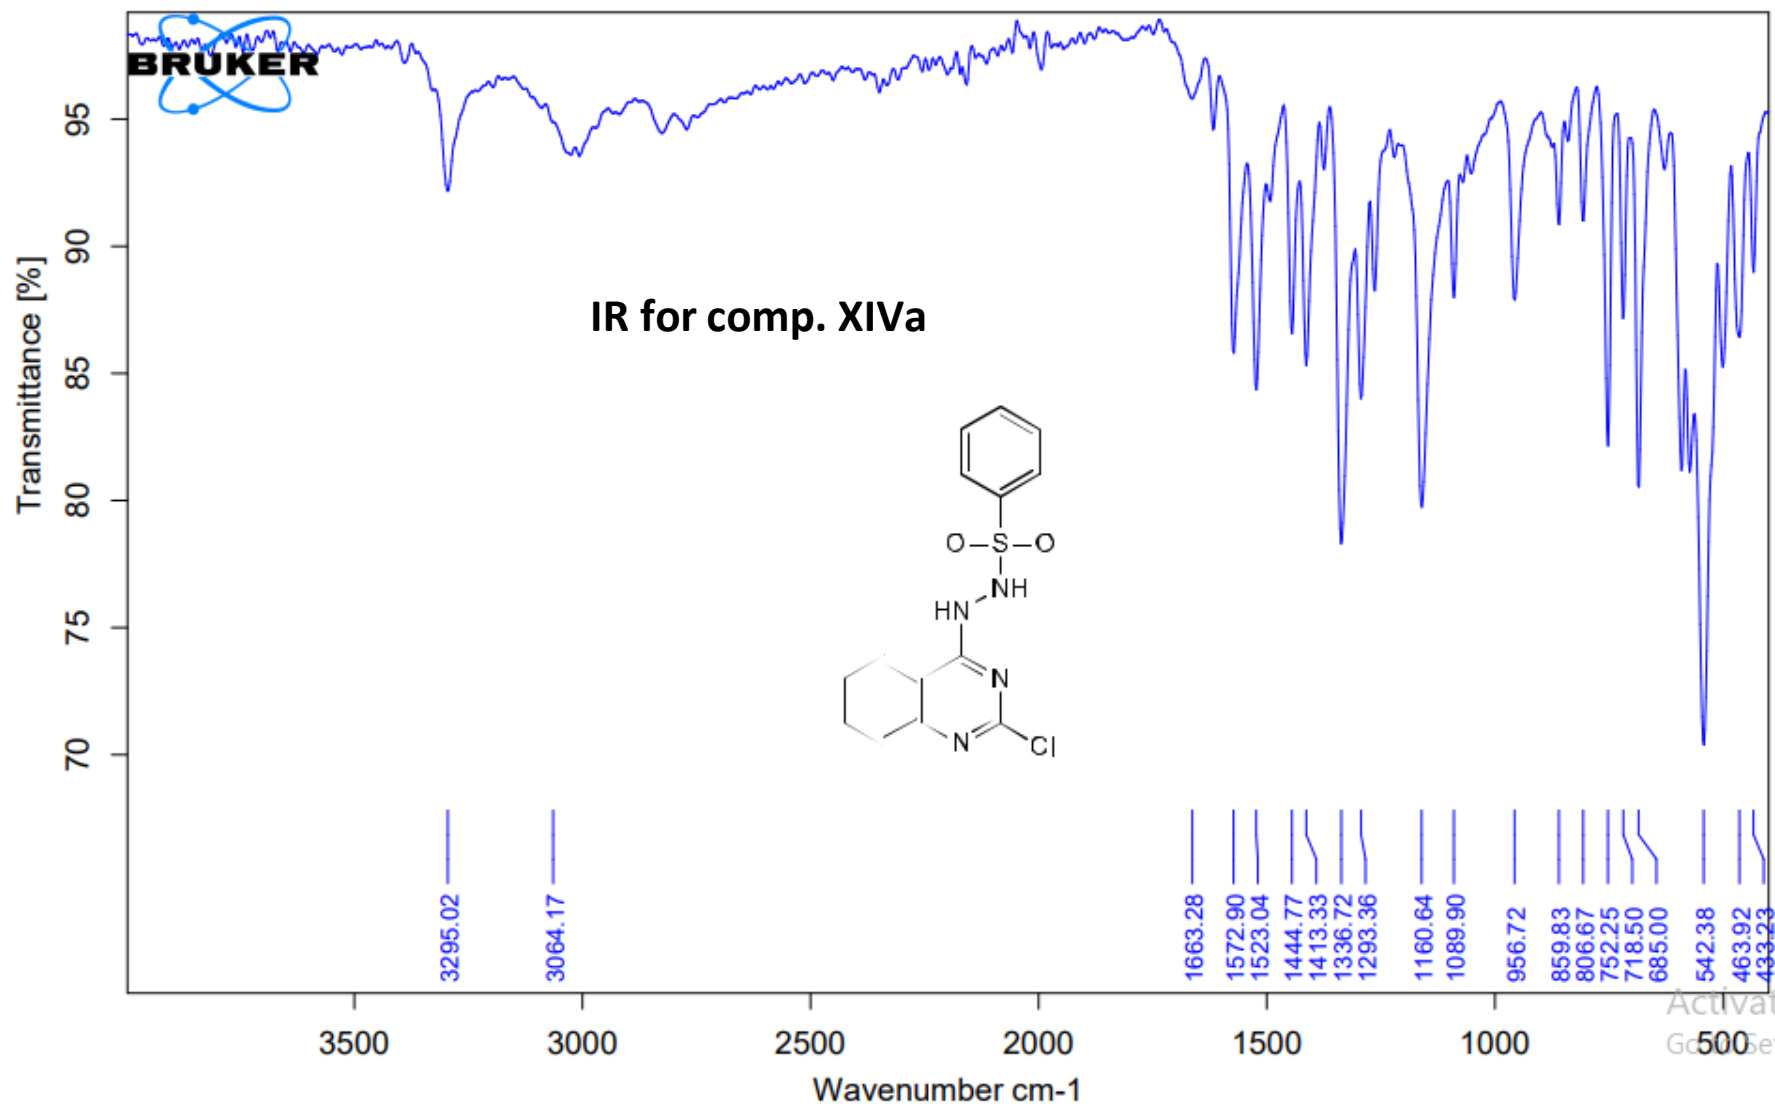

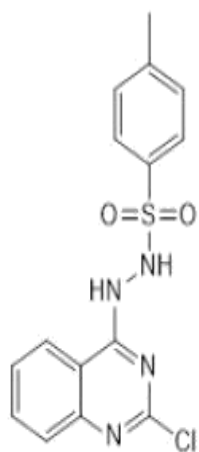

# **<sup>1</sup>H NMR for comp. XIVb**

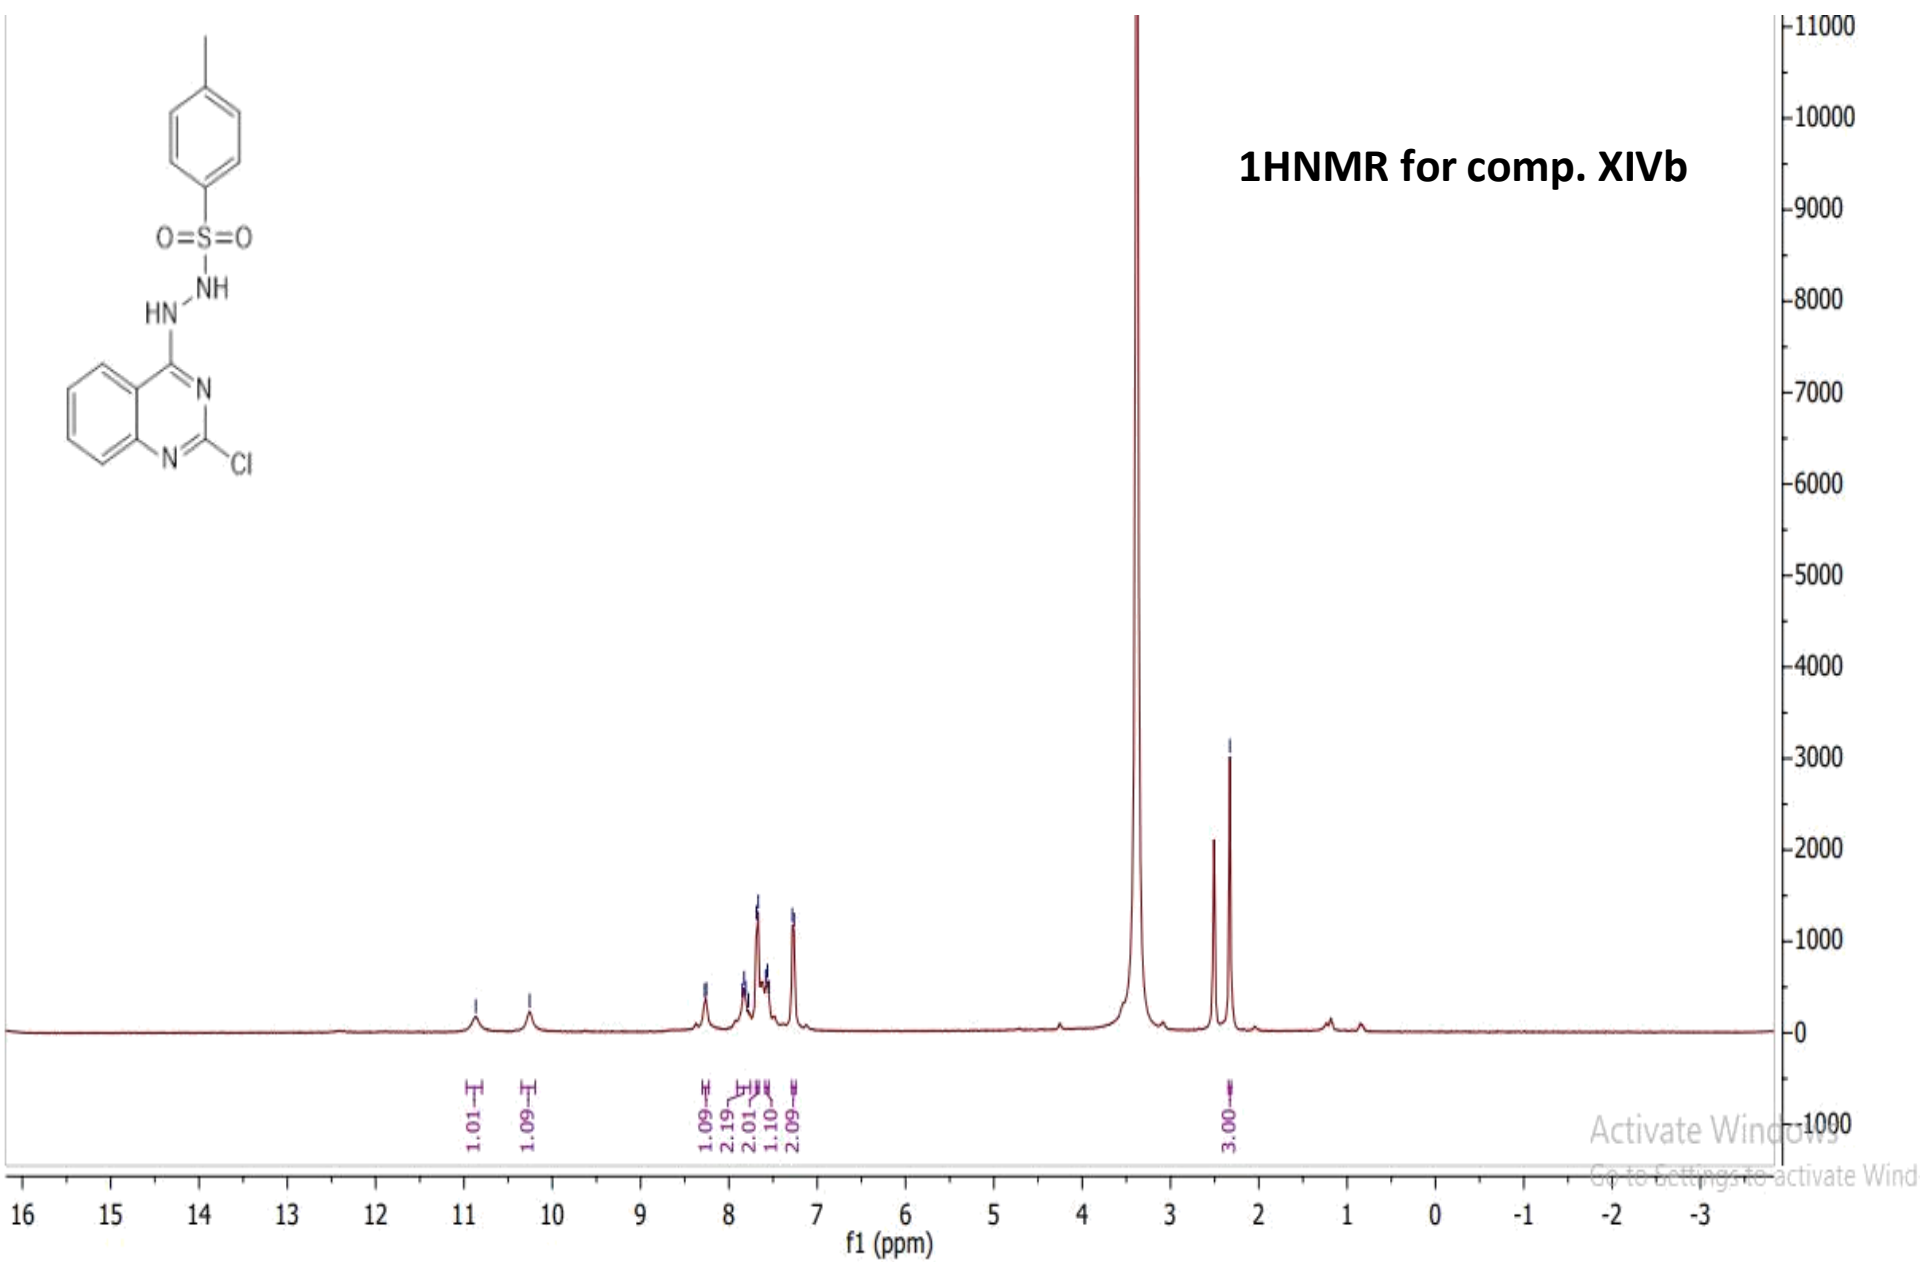



RRM-B6.1.fid

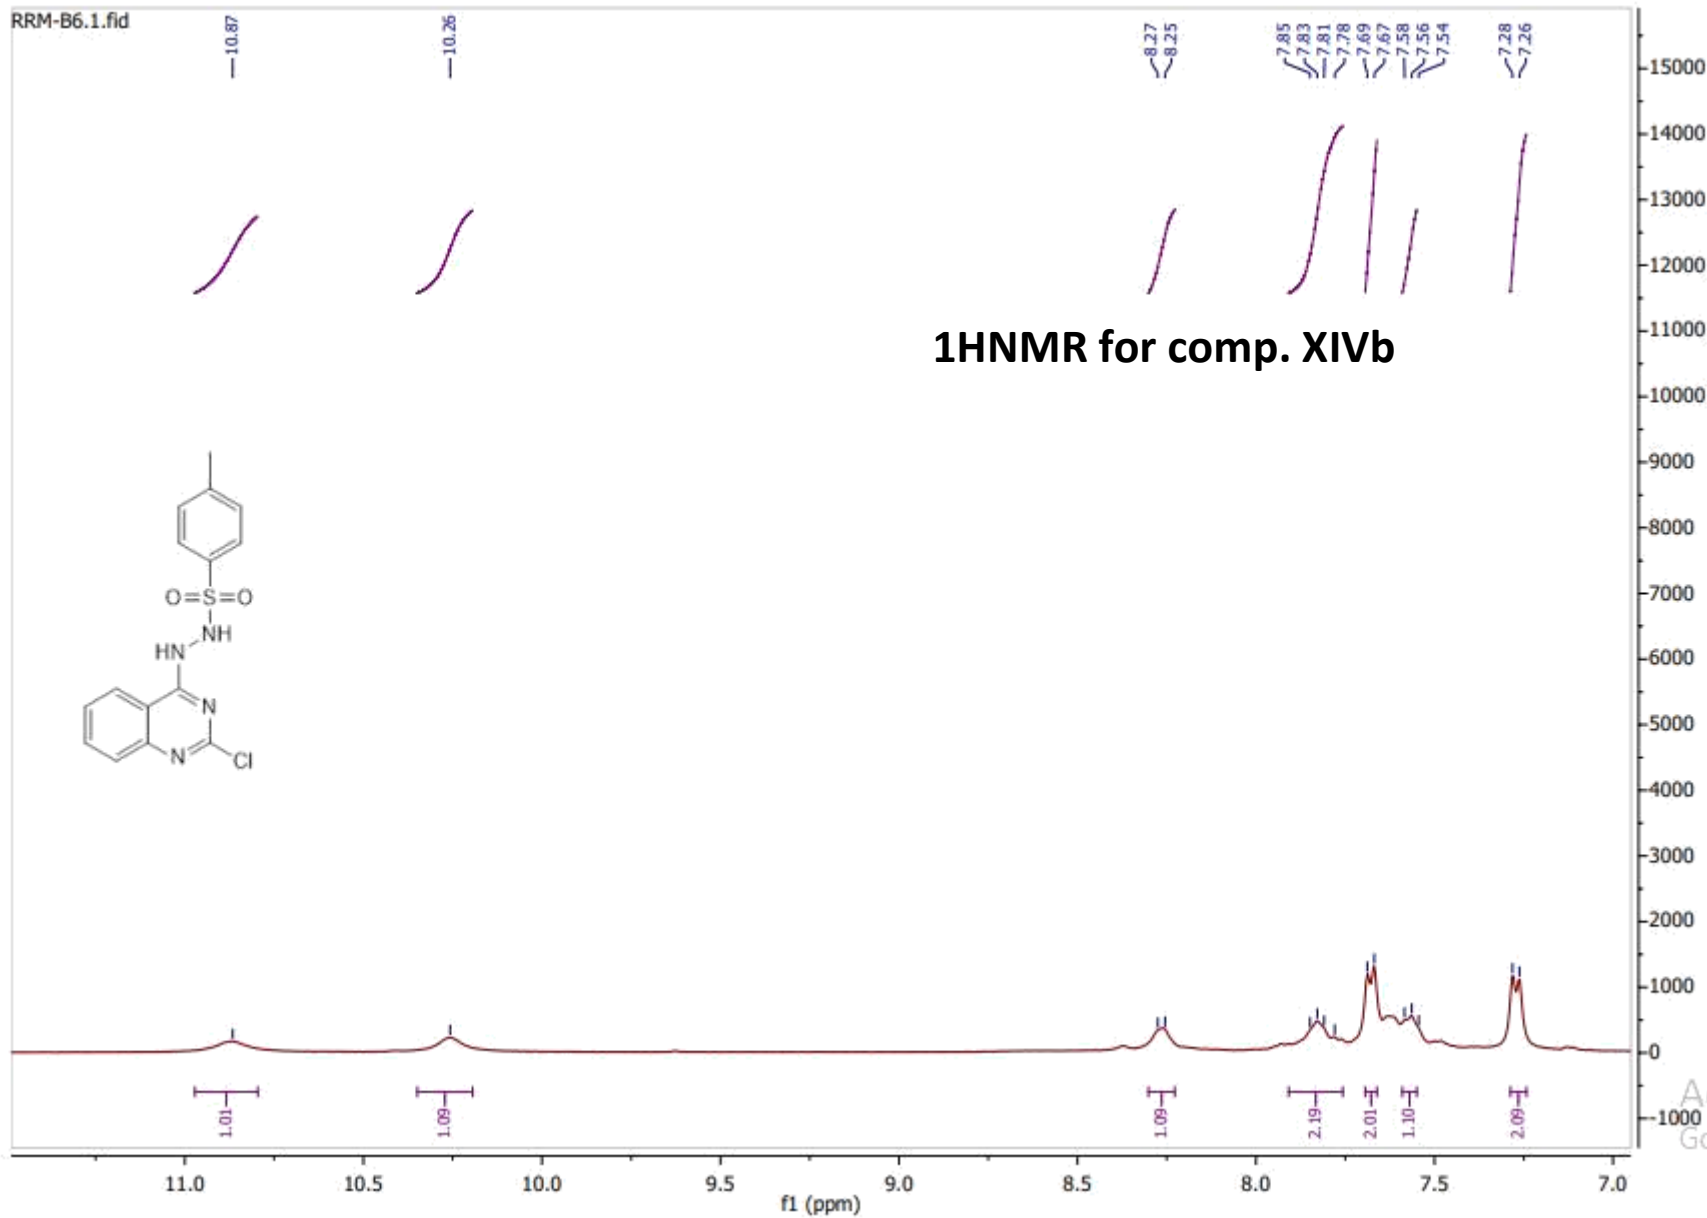

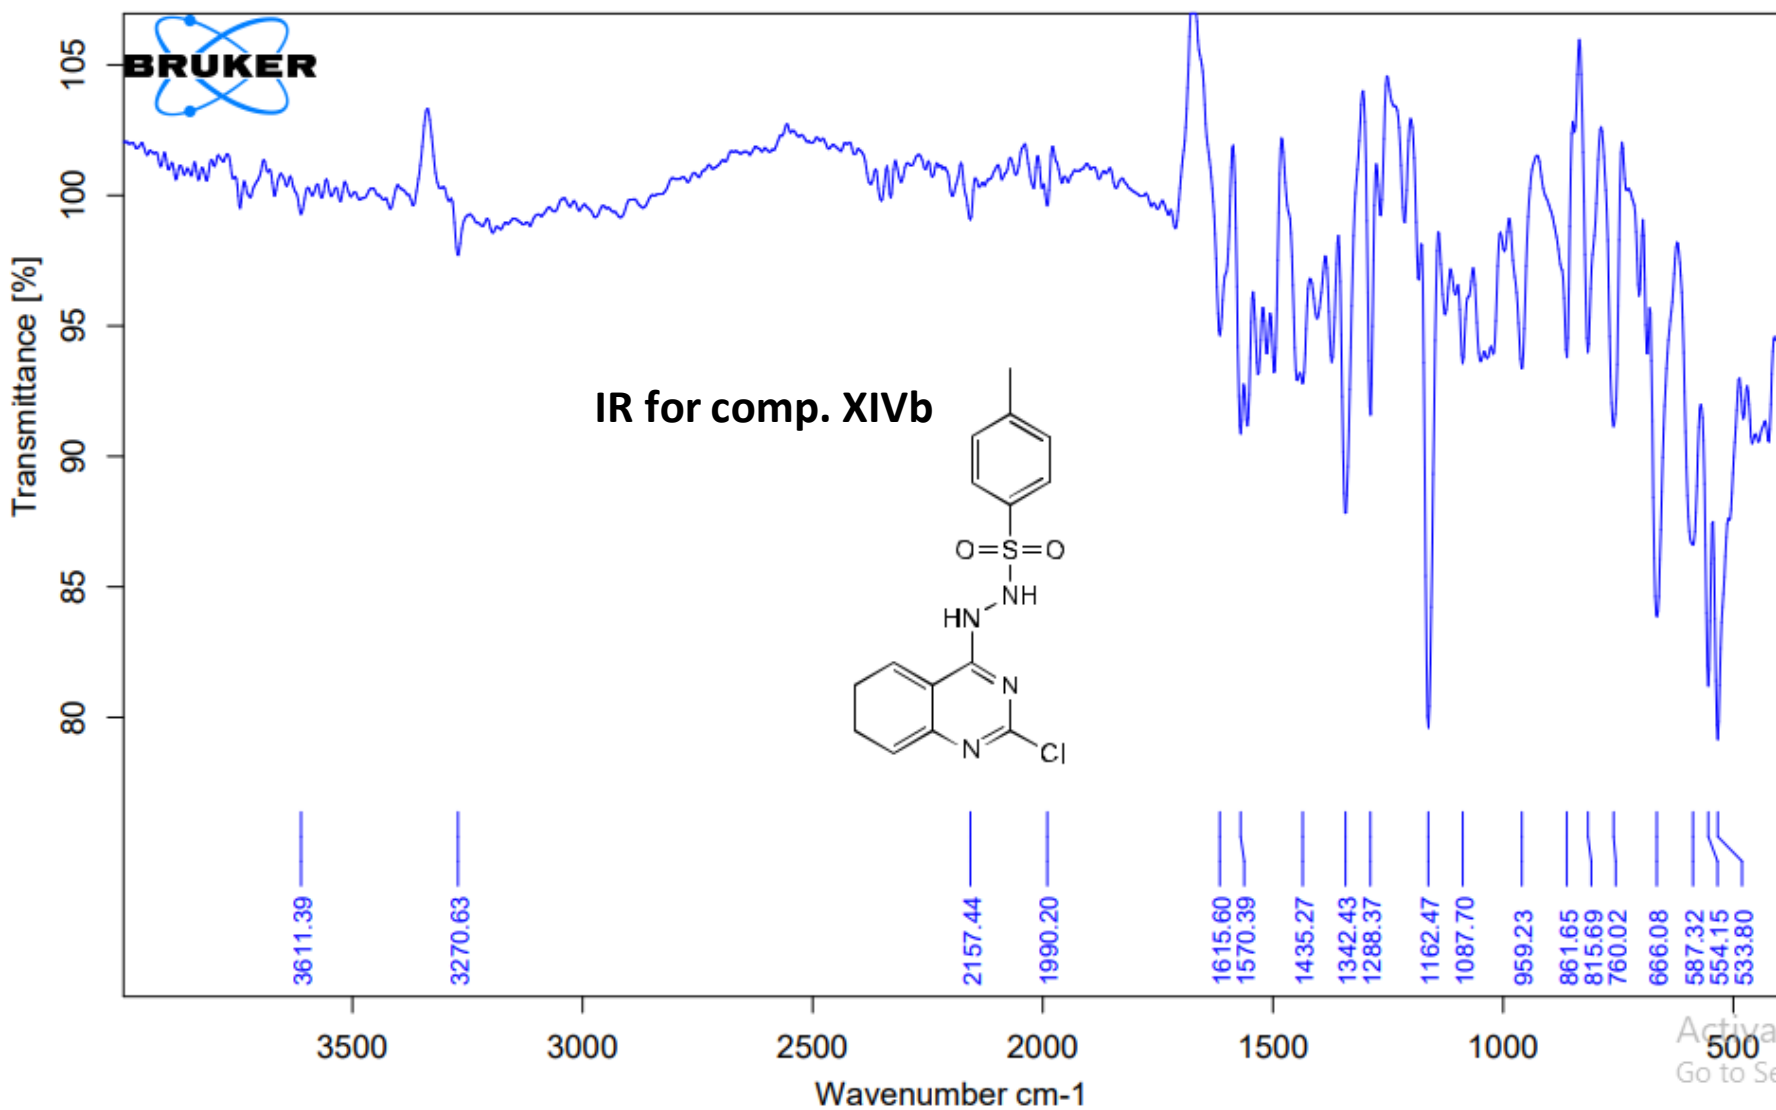

MMI-A5.1.fid

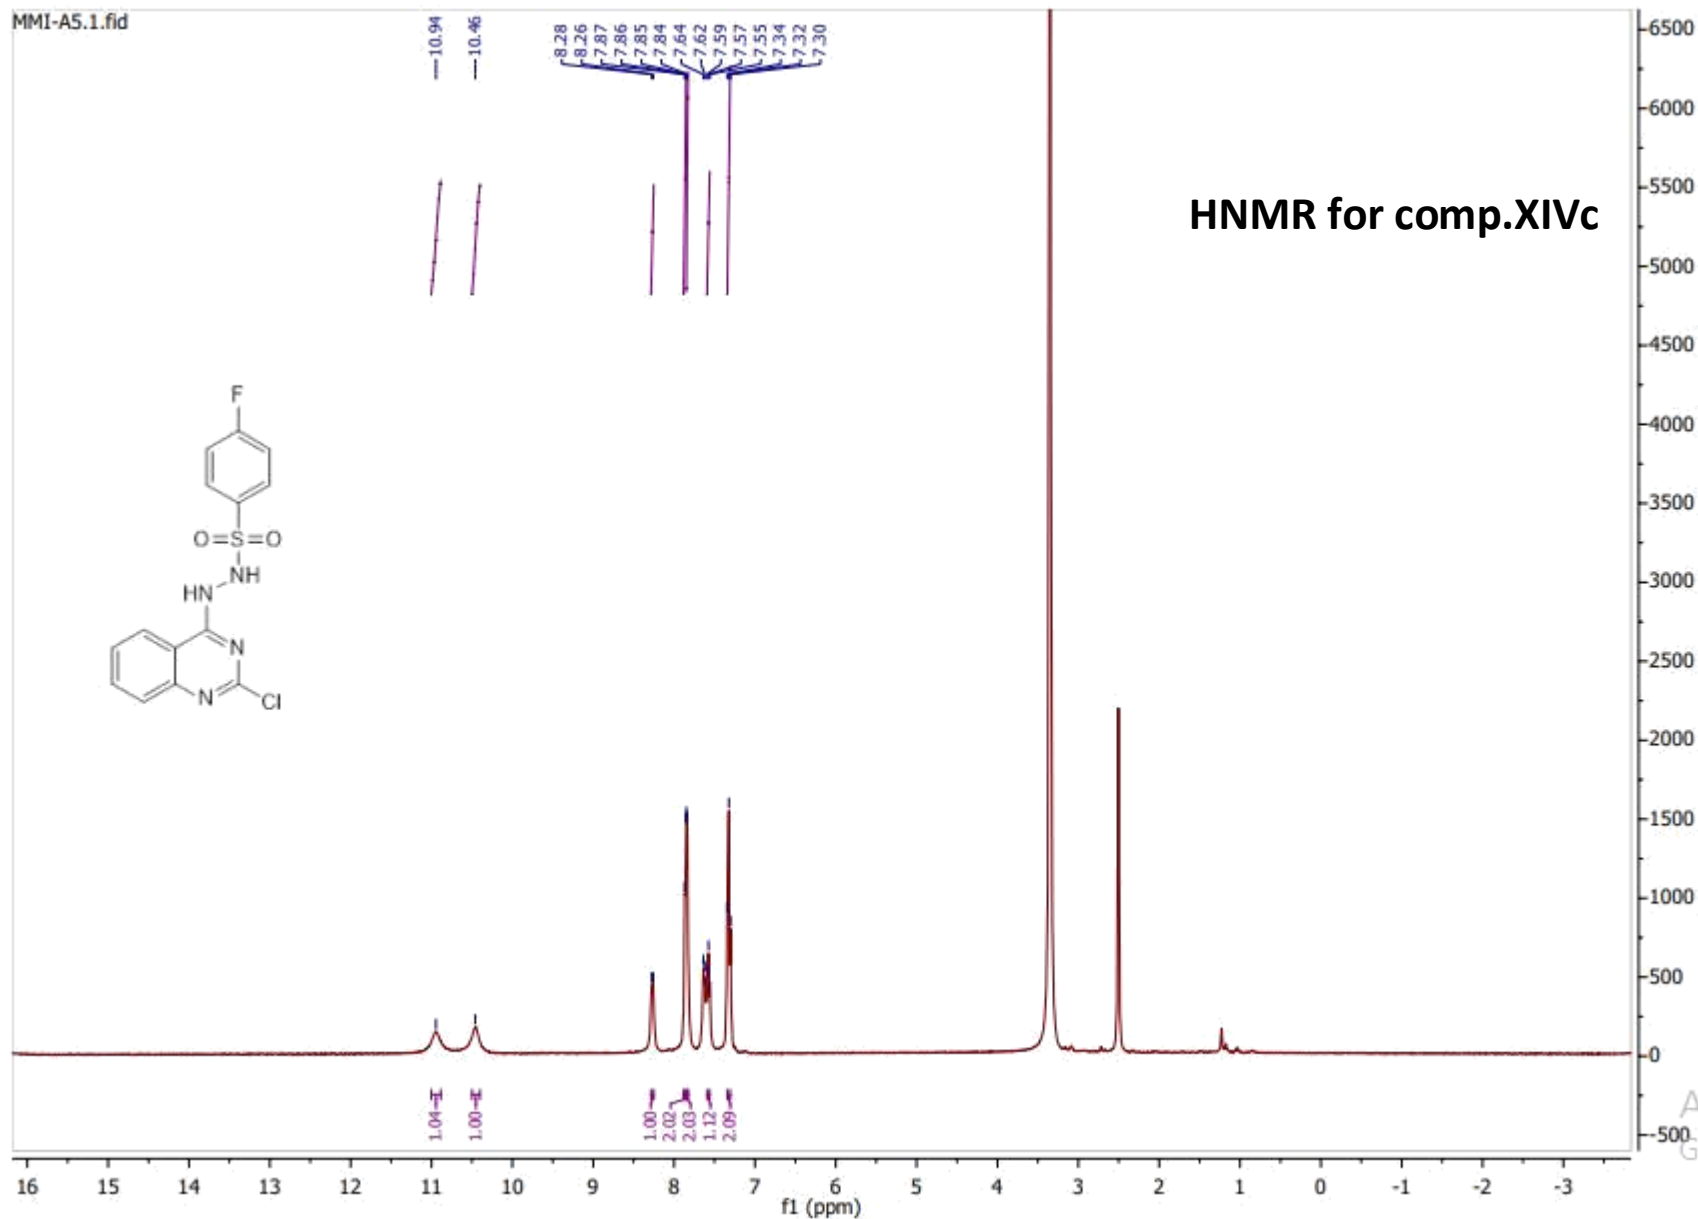

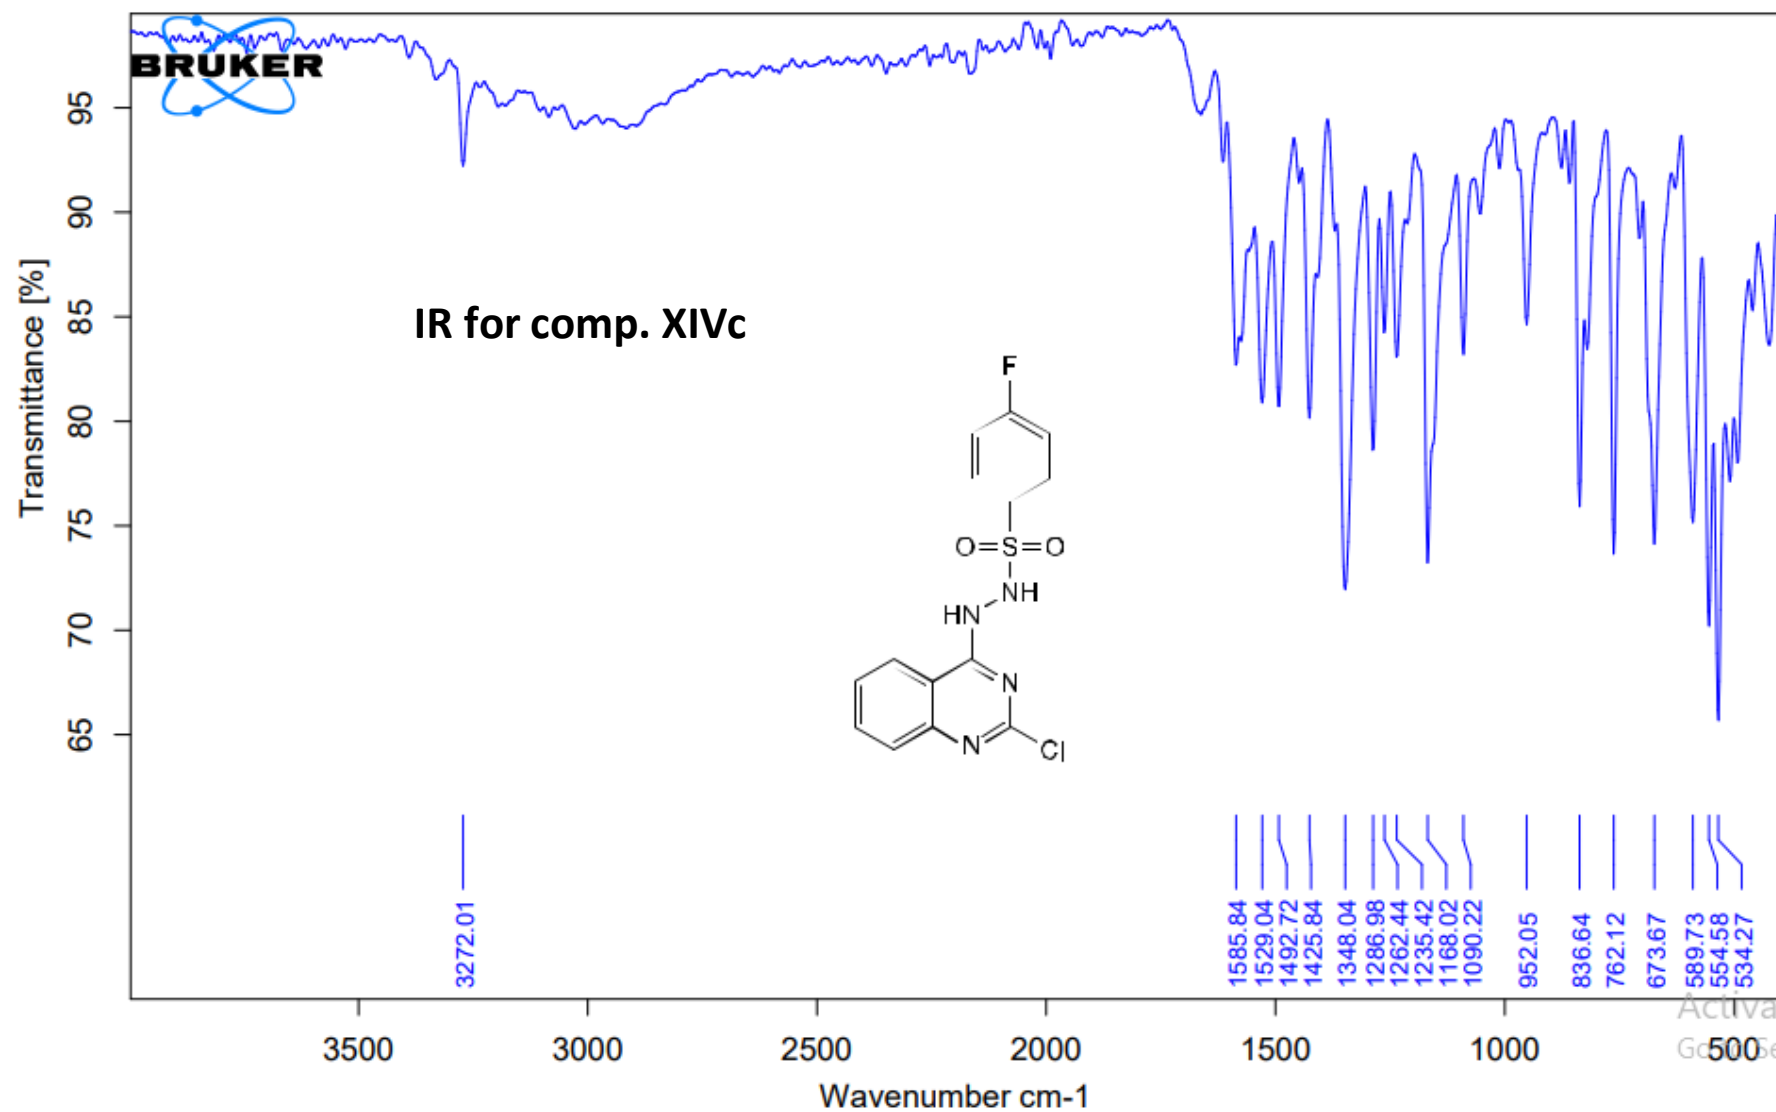

# 1HNMR for comp. XVI

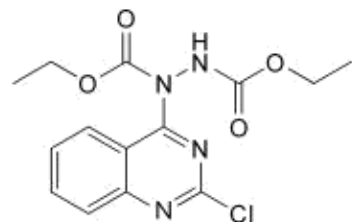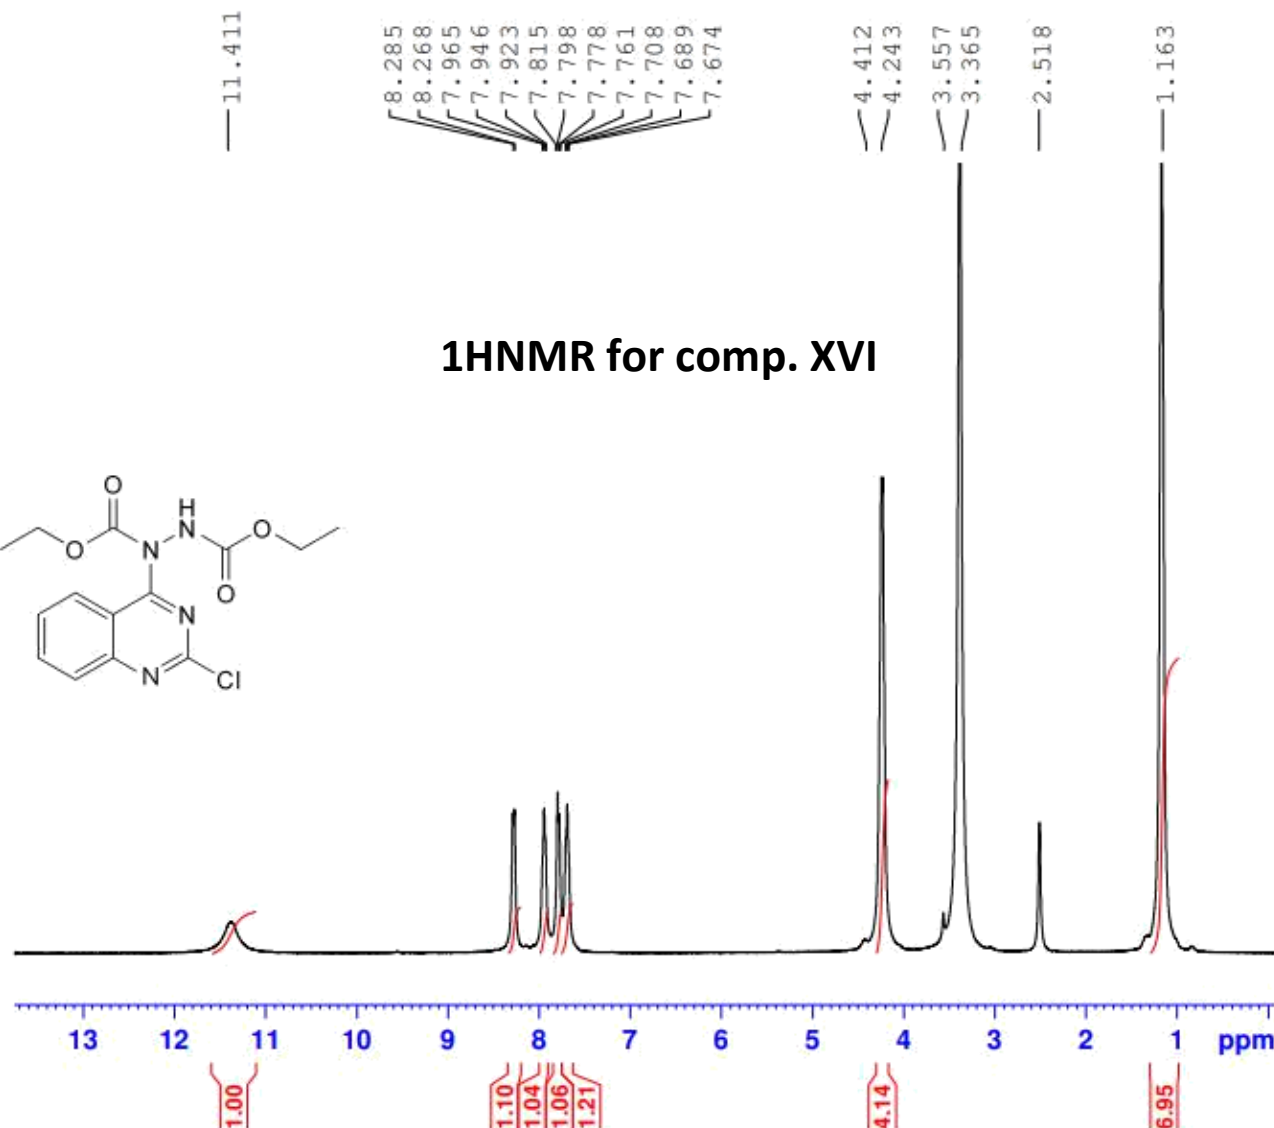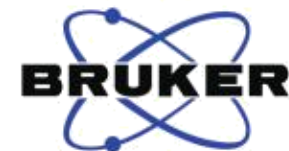

Current Data Parameters  
 NAME RRM-B5  
 EXPNO 1  
 PROCNO 1

F2 - Acquisition Parameters  
 Date\_ 20200116  
 Time 10.42  
 INSTRUM spect  
 PROBHD 5 mm PABBO BB/  
 PULPROG zg30  
 TD 65536  
 SOLVENT DMSO  
 NS 59  
 DS 2  
 SWH 8012.820 Hz  
 FIDRES 0.122266 Hz  
 AQ 4.0894465 sec  
 RG 205.37  
 DW 62.400 usec  
 DE 6.50 usec  
 TE 298.0 K  
 D1 1.00000000 sec  
 TD0 1

----- CHANNEL f1 -----  
 SFO1 400.1524711 MHz  
 NUC1 1H  
 P1 12.00 usec  
 PLW1 18.00000000 W

F2 - Processing parameters  
 SI 65536  
 SF 400.1500000 MHz  
 WDW EM  
 SSB 0  
 LB 0.30 Hz  
 GB 0  
 PC 1.00

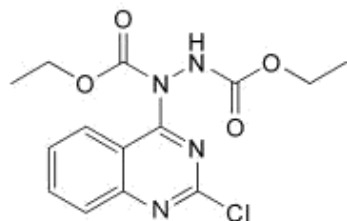

# 1HNMR for comp.XVI

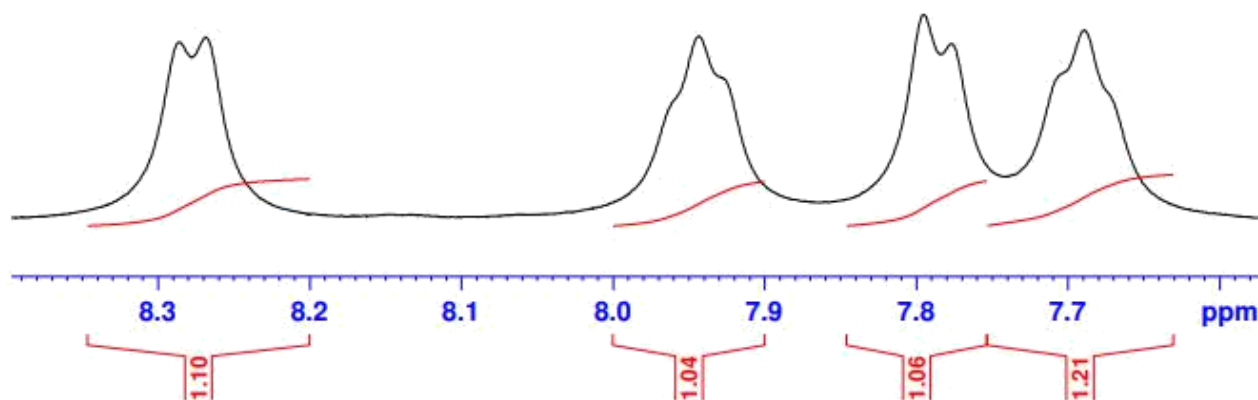

— 8.285  
— 8.268

— 7.965  
— 7.946  
— 7.923

— 7.815  
— 7.798  
— 7.778  
— 7.761

— 7.708  
— 7.689  
— 7.674

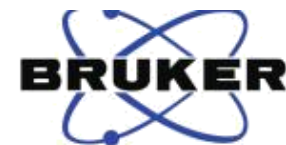

Current Data Parameters  
NAME RRM-B5  
EXPNO 1  
PROCNO 1

F2 - Acquisition Parameters  
Date\_ 20200116  
Time 10.42  
INSTRUM spect  
PROBHD 5 mm PABBO BB/  
PULPROG zg30  
TD 65536  
SOLVENT DMSO  
NS 59  
DS 2  
SWH 8012.820 Hz  
FIDRES 0.122266 Hz  
AQ 4.0894465 sec  
RG 205.37  
DW 62.400 usec  
DE 6.50 usec  
TE 298.0 K  
D1 1.00000000 sec  
TD0 1

----- CHANNEL f1 -----  
SFO1 400.1524711 MHz  
NUC1 1H  
P1 12.00 usec  
PLW1 18.00000000 W

F2 - Processing parameters  
SI 65536  
SF 400.1500000 MHz  
WDW EM  
SSB 0  
LB 0.30 Hz  
GB 0  
PC 1.00

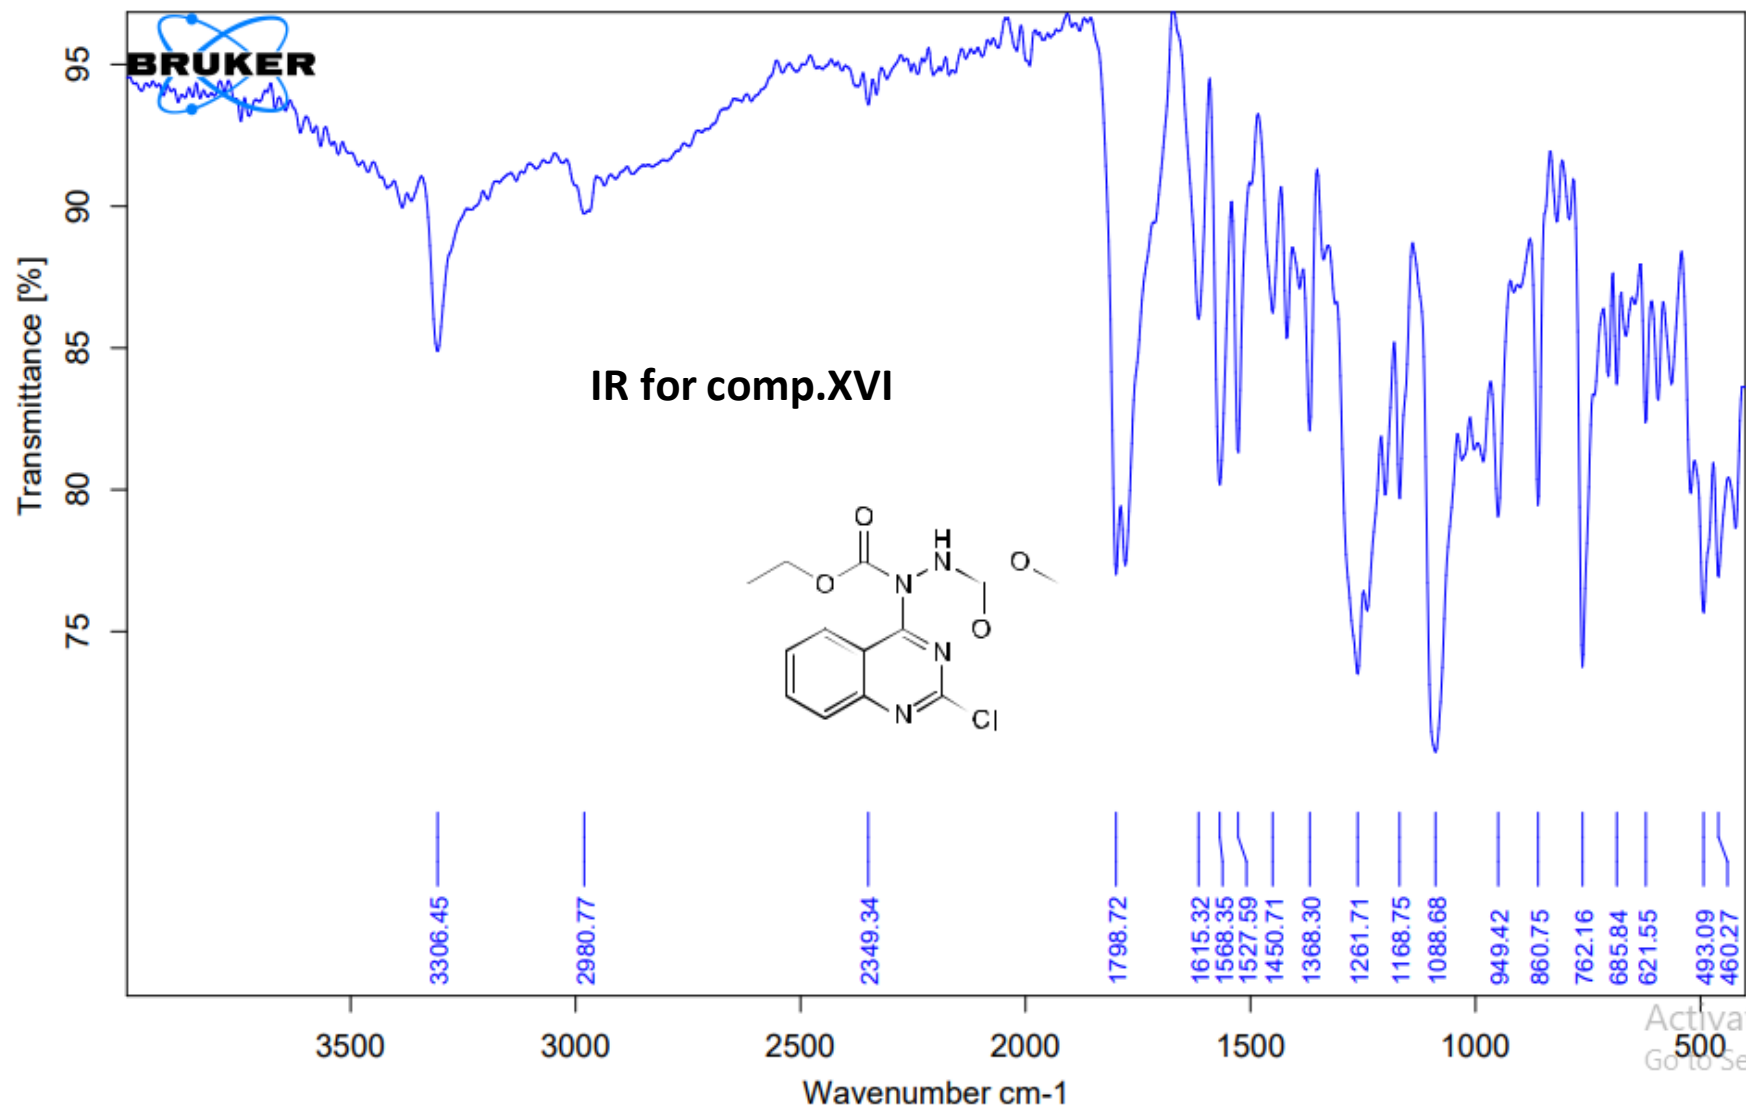

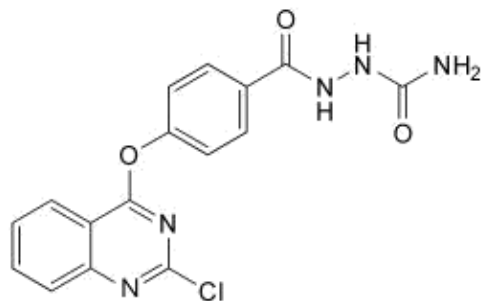

# **<sup>1</sup>H NMR for comp. XIX**

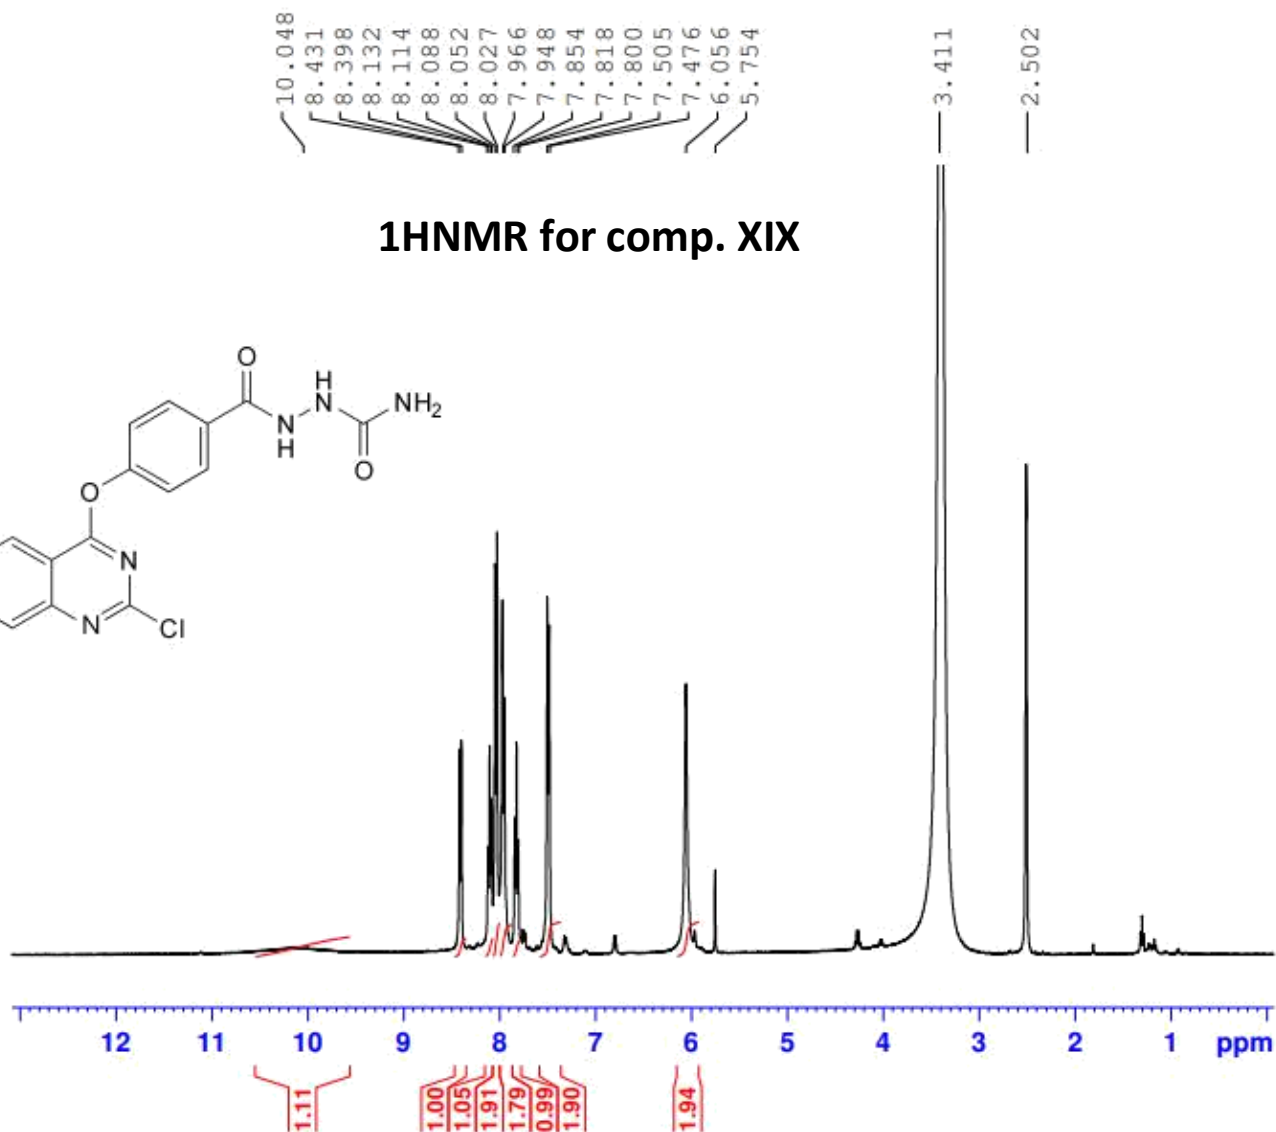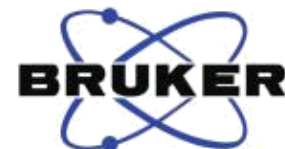

Current Data Parameters  
 NAME RRM-B1  
 EXPNO 1  
 PROCNO 1

F2 - Acquisition Parameters  
 Date\_ 20200116  
 Time 12.08  
 INSTRUM spect  
 PROBHD 5 mm PABBO BB/  
 PULPROG zg30  
 TD 65536  
 SOLVENT DMSO  
 NS 105  
 DS 2  
 SWH 8012.820 Hz  
 FIDRES 0.122266 Hz  
 AQ 4.0894465 sec  
 RG 205.37  
 DW 62.400 usec  
 DE 6.50 usec  
 TE 298.0 K  
 D1 1.00000000 sec  
 TD0 1

----- CHANNEL f1 -----  
 SFO1 400.1524711 MHz  
 NUC1 1H  
 P1 12.00 usec  
 PLW1 18.00000000 W

F2 - Processing parameters  
 SI 65536  
 SF 400.1500000 MHz  
 WDW EM  
 SSB 0  
 LB 0.30 Hz  
 GB 0  
 PC 1.00

Activate Win  
 Go to Settings t



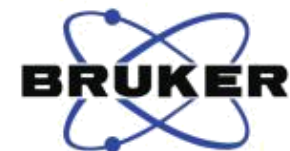

Current Data Parameters  
NAME RRM-B1  
EXPNO 1  
PROCNO 1

F2 - Acquisition Parameters  
Date\_ 20200116  
Time 12.08  
INSTRUM spect  
PROBHD 5 mm PABBO BB/  
PULPROG zg30  
TD 65536  
SOLVENT DMSO  
NS 105  
DS 2  
SWH 8012.820 Hz  
FIDRES 0.122266 Hz  
AQ 4.0894465 sec  
RG 205.37  
DW 62.400 usec  
DE 6.50 usec  
TE 298.0 K  
D1 1.00000000 sec  
TD0 1

----- CHANNEL f1 -----  
SFO1 400.1524711 MHz  
NUC1 1H  
P1 12.00 usec  
PLW1 18.00000000 W

F2 - Processing parameters  
SI 65536  
SF 400.1500000 MHz  
WDW EM  
SSB 0  
LB 0.30 Hz  
GB 0  
PC 1.00

## <sup>1</sup>H NMR for comp. XIX

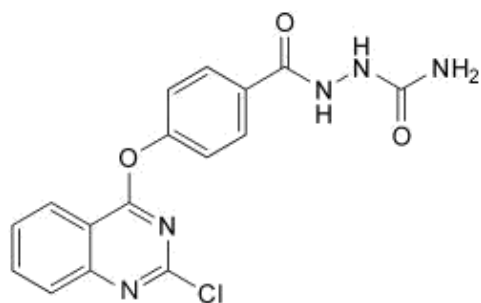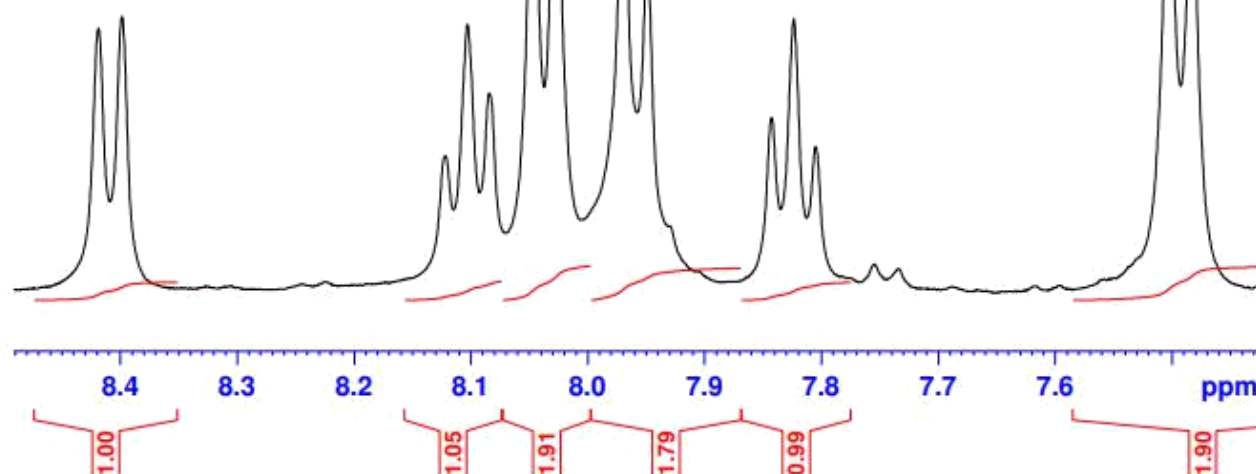

Activate Win  
Go to Settings to

RRM-B1.2.fid

173.25  
168.08  
157.01  
154.91  
154.67  
152.73  
136.47  
131.62  
129.97  
129.04  
127.17  
124.51  
123.22  
122.30  
115.31

**$^{13}\text{C}$  NMR for comp. XIX**

f1 (ppm)

Active  
Go to S

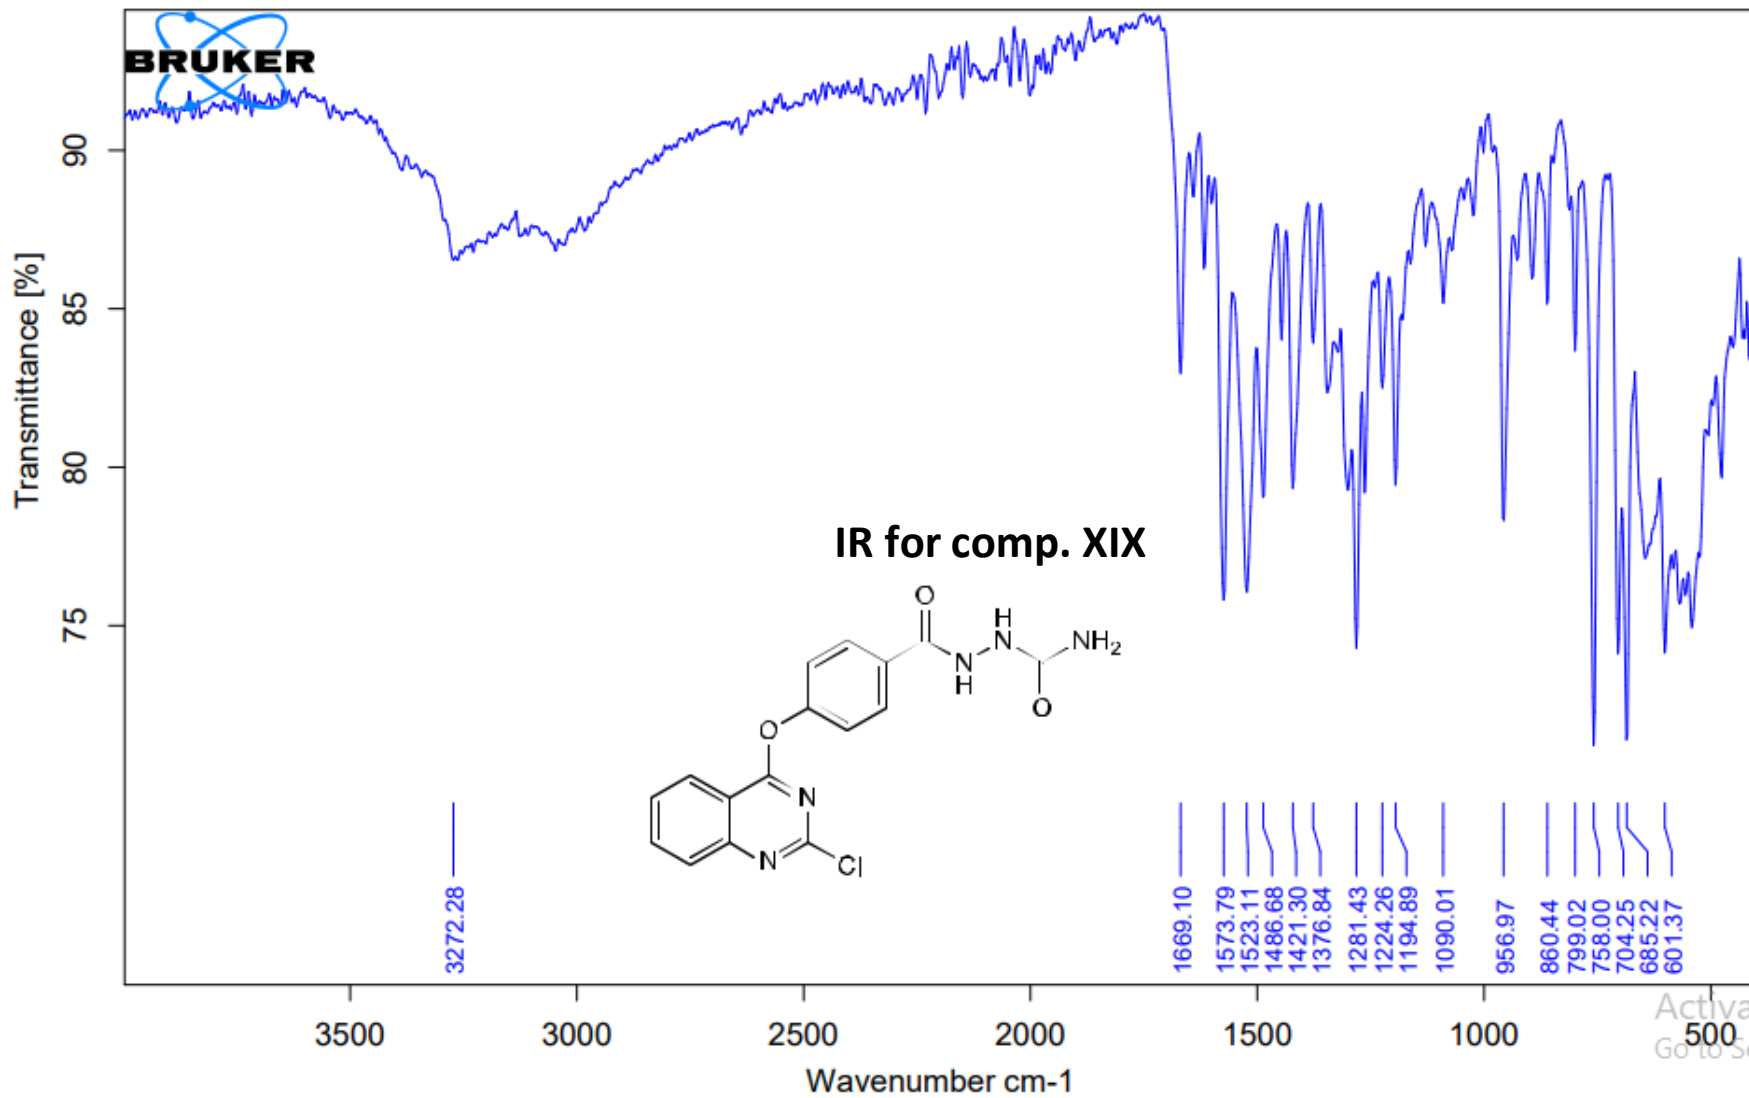

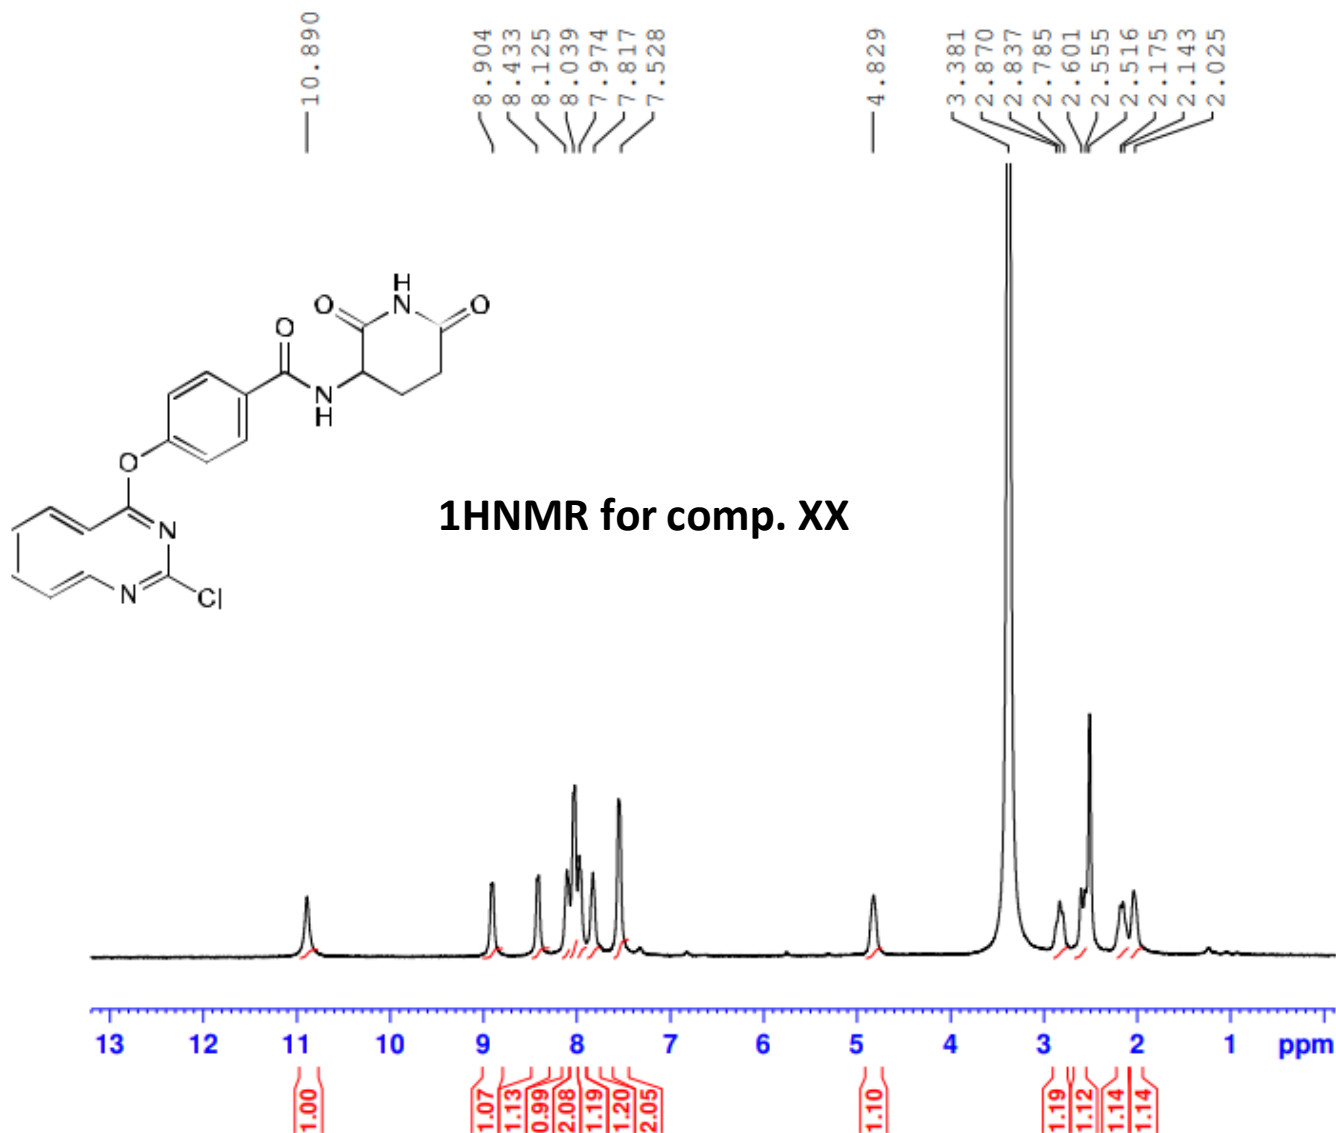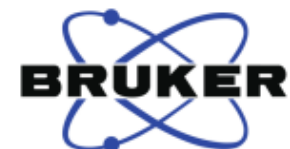

Current Data Parameters  
 NAME RRM-B2  
 EXPNO 1  
 PROCNO 1

F2 - Acquisition Parameters  
 Date\_ 20200116  
 Time 12.16  
 INSTRUM spect  
 PROBHD 5 mm PABBO BB/  
 PULPROG zg30  
 TD 65536  
 SOLVENT DMSO  
 NS 69  
 DS 2  
 SWH 8012.820 Hz  
 FIDRES 0.122266 Hz  
 AQ 4.0894465 sec  
 RG 205.37  
 DW 62.400 usec  
 DE 6.50 usec  
 TE 298.0 K  
 D1 1.00000000 sec  
 TD0 1

----- CHANNEL f1 -----  
 SFO1 400.1524711 MHz  
 NUC1 1H  
 P1 12.00 usec  
 PLW1 18.00000000 W

F2 - Processing parameters  
 SI 65536  
 SF 400.1500000 MHz  
 WDW EM  
 SSB 0  
 LB 0.30 Hz  
 GB 0  
 PC 1.00

RRM-B2.3.fid

# 13CNMR for comp. XIX

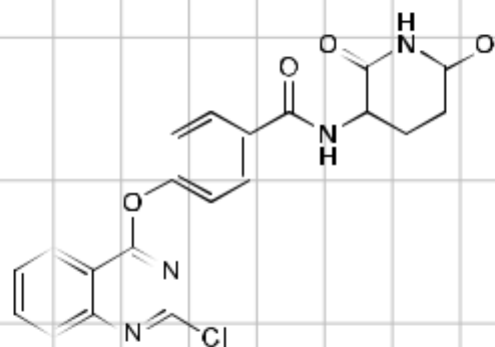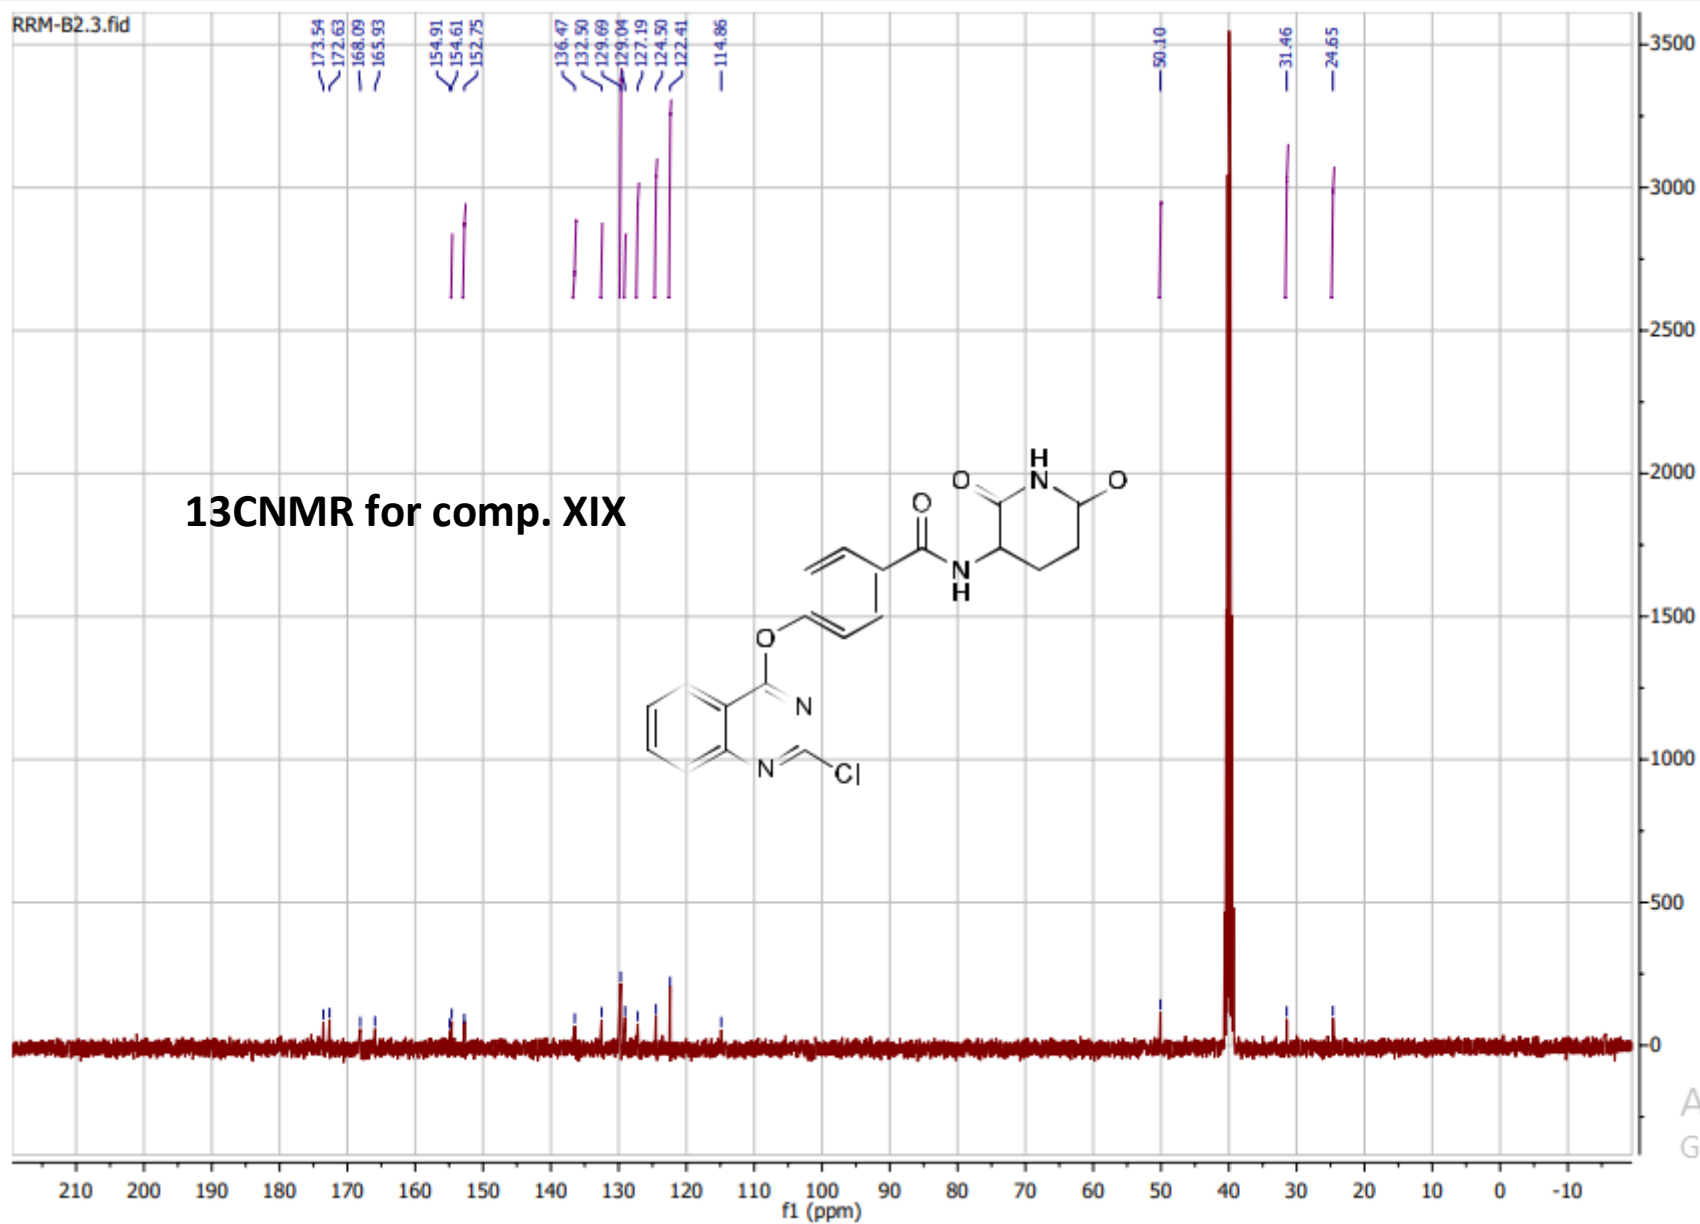

Active  
Go to S

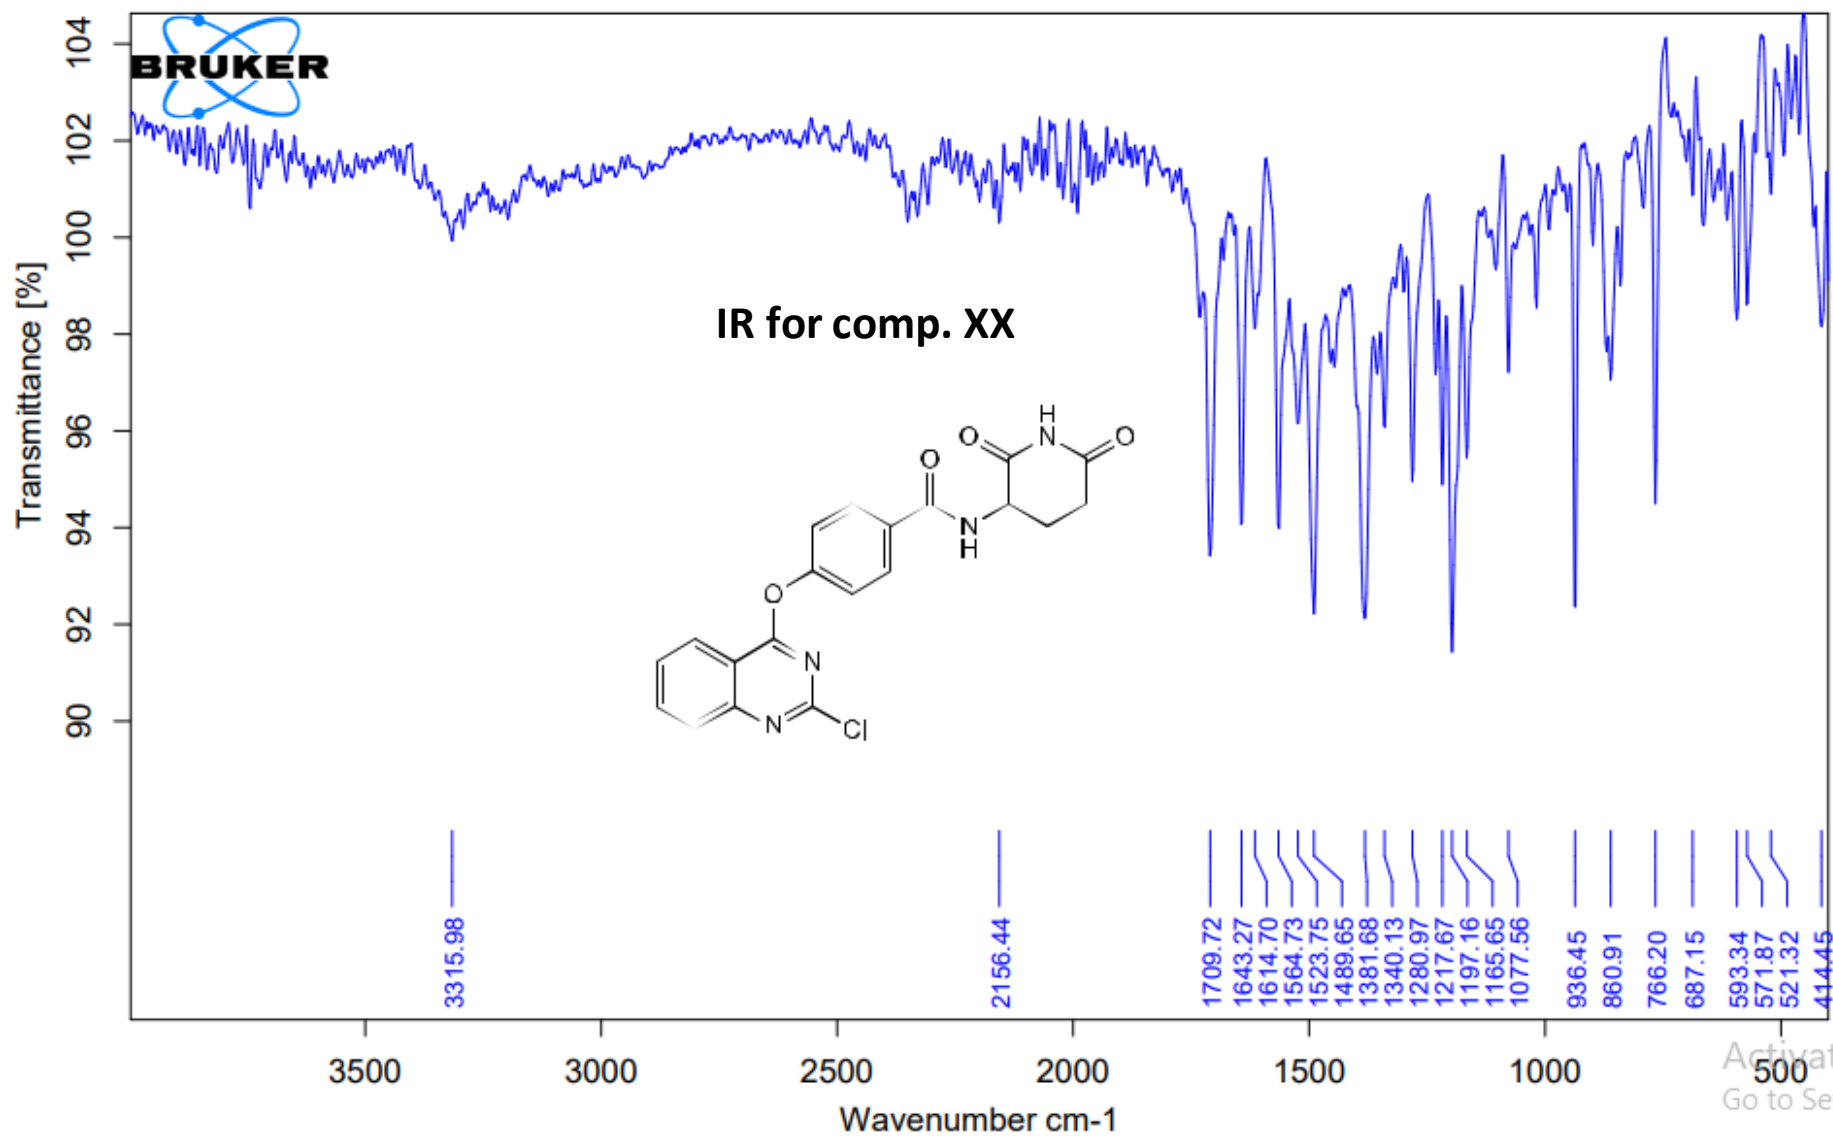

Supplement: s1 [file s1]
